# Supplementary material for: Response of soil pH to biochar application in farmland across China: a meta-analysis
Source: PeerJ. 2025 Apr 28;13:e19400. doi: 10.7717/peerj.19400 (PMC12045268; doi:10.7717/peerj.19400)
Supplement: Supplemental Information 1 [file peerj-13-19400-s001.xlsx]

## Sheet: all
Num.	发表年份	试验年份	试验方法	Original soil pH	Soil pH	Soil depth/cm	Biochar raw materials	Types of biochar	Biochar's pH	Biochar's pH	Biochar preparation temperature/℃	Biochar preparation temperature/℃	Biochar preparation temperature/℃	Control group	The experiment group	Control group biochar addition	Experiment group biochar addition	Experiment group biochar addition	Unit conversion		Control group pH	SD	SE	Experiment group pH	SD	SE
13	2021年		盆栽	6.45	Acid		rubber wood timber.	Wood biochar	＞8	10.26	400-600	450	400-500	No biochar added	Biochar added	0	1%-5%	0.01			6.4	0.13416	0.06	7.2	0.1118	0.05
13	2021年		盆栽	6.45	Acid		rubber wood timber.	Wood biochar	＞8	10.26	400-600	450	400-500	No biochar added	Biochar added	0	1%-5%	0.02			6.4	0.13416	0.06	7.58	0.1118	0.05
13	2021年		盆栽	6.45	Acid		rubber wood timber.	Wood biochar	＞8	10.26	400-600	450	400-500	No biochar added	Biochar added	0	1%-5%	0.03			6.4	0.13416	0.06	7.8	0.06708	0.03
13	2021年		盆栽	6.45	Acid		rubber wood timber.	Wood biochar	＞8	10.26	400-600	450	400-500	No biochar added	Biochar added	0	1%-5%	0.01			6.4	0.13416	0.06	7.11	0.08944	0.04
13	2021年		盆栽	6.45	Acid		rubber wood timber.	Wood biochar	＞8	10.26	400-600	450	400-500	No biochar added	Biochar added	0	1%-5%	0.02			6.4	0.13416	0.06	7.48	0.15652	0.07
13	2021年		盆栽	6.45	Acid		rubber wood timber.	Wood biochar	＞8	10.26	400-600	450	400-500	No biochar added	Biochar added	0	1%-5%	0.03			6.4	0.13416	0.06	7.69	0.04472	0.02
13	2021年		盆栽	6.45	Acid		rubber wood timber.	Wood biochar	＞8	10.26	400-600	450	400-500	No biochar added	Biochar added	0	1%-5%	0.01			6.4	0.13416	0.06	7.24	0.04472	0.02
13	2021年		盆栽	6.45	Acid		rubber wood timber.	Wood biochar	＞8	10.26	400-600	450	400-500	No biochar added	Biochar added	0	1%-5%	0.02			6.4	0.13416	0.06	7.53	0.1118	0.05
13	2021年		盆栽	6.45	Acid		rubber wood timber.	Wood biochar	＞8	10.26	400-600	450	400-500	No biochar added	Biochar added	0	1%-5%	0.03			6.4	0.13416	0.06	7.8	0.04472	0.02
16	2014年	2013年	小区	4.18	Acid	0-10	wheat straw	Straw biochar	＞8	10.35	400-600	400	300-500	No biochar added	Biochar added	0	＜1%	0.0003	0.758 t/ha	758 kg/hm2	4.46	0.09		5.1	0.35
16	2014年	2013年	小区	4.18	Acid	0-10	wheat straw	Straw biochar	＞8	10.35	400-600	400	300-500	No biochar added	Biochar added	0	＜1%	0.0006	1.515 t/ha	1515 kg/hm2	4.46	0.09		5	0.01
16	2014年	2013年	小区	4.18	Acid	10-20	wheat straw	Straw biochar	＞8	10.35	400-600	400	300-500	No biochar added	Biochar added	0	＜1%	0.0003	0.758 t/ha	758 kg/hm2	4.41	0.04		4.53	0.39
16	2014年	2013年	小区	4.18	Acid	10-20	wheat straw	Straw biochar	＞8	10.35	400-600	400	300-500	No biochar added	Biochar added	0	＜1%	0.0006	1.515 t/ha	1515 kg/hm2	4.41	0.04		4.73	0.19
16	2014年	2013年	小区	4.18	Acid	20-40	wheat straw	Straw biochar	＞8	10.35	400-600	400	300-500	No biochar added	Biochar added	0	＜1%	0.0003	0.758 t/ha	758 kg/hm2	4.63	0.01		4.69	0.23
16	2014年	2013年	小区	4.18	Acid	20-40	wheat straw	Straw biochar	＞8	10.35	400-600	400	300-500	No biochar added	Biochar added	0	＜1%	0.0006	1.515 t/ha	1515 kg/hm2	4.63	0.01		4.67	0.17
16	2014年	2013年	小区	4.18	Acid	40-60	wheat straw	Straw biochar	＞8	10.35	400-600	400	300-500	No biochar added	Biochar added	0	＜1%	0.0006	1.515 t/ha	1515 kg/hm2	4.59	0.2		4.66	0.36
17	2020年	2013-2014年	小区	6.36	Acid	0-20	straw	Straw biochar	＞8	9.02	400-600	450	400-500	No biochar added	Biochar added	0	＜1%	0.0008	2 t/hm2		6.56	0.056		6.71	0.06
17	2020年	2013-2014年	小区	6.36	Acid	0-20	straw	Straw biochar	＞8	9.02	400-600	450	400-500	No biochar added	Biochar added	0	1%-5%	0.0167	40 t/hm2		6.56	0.056		6.87	0.05
22	2013年	2012年	小区	5.1	Acid	0-30	rice hull	Straw biochar	＞8	10.4	400-600	500	500	No biochar added	Biochar added	0	＜1%	0.0003	0.75 t/ha	750kg/hm2	5.07	0.507		5.07	0.507
22	2013年	2012年	小区	5.1	Acid	0-30	rice hull	Straw biochar	＞8	10.4	400-600	500	500	No biochar added	Biochar added	0	＜1%	0.0006	1.5 t/ha	1500 kg/hm2	5.07	0.507		5.29	0.529
22	2013年	2012年	小区	5.1	Acid	0-30	rice hull	Straw biochar	＞8	10.4	400-600	500	500	No biochar added	Biochar added	0	＜1%	0.0013	3 t/ha	3000 kg/hm2	5.07	0.507		5.14	0.514
22	2013年	2012年	盆栽	5.1	Acid	0-30	rice hull	Straw biochar	＞8	10.4	400-600	500	500	No biochar added	Biochar added	0	＜1%	0.001			4.95	0.495		5.13	0.272
22	2013年	2012年）	盆栽	5.1	Acid	0-30	rice hull	Straw biochar	＞8	10.4	400-600	500	500	No biochar added	Biochar added	0	1%-5%	0.01			4.95	0.495		6.81	0.238
22	2013年	2012年	盆栽	5.1	Acid	0-30	rice hull	Straw biochar	＞8	10.4	400-600	500	500	No biochar added	Biochar added	0	5%-10%	0.05			4.95	0.495		7.69	0.265
24	2021年	2012-2013年	小区	5.4	Acid	0-15	wheat straw	Straw biochar	＞8	9.3	400-600	500	500	No biochar added	Biochar added	0	1%-5%	0.01	24 t/hm2		5.69	0.08		5.93	0.04
24	2021年	2012-2013年	小区	5.4	Acid	0-15	wheat straw	Straw biochar	＞8	9.3	400-600	500	500	No biochar added	Biochar added	0	1%-5%	0.02	48 t/hm2		5.69	0.08		6.38	0.1
24	2021年	2012-2013年	小区	5.4	Acid	0-15	wheat straw	Straw biochar	＞8	9.3	400-600	500	500	No biochar added	Biochar added	0	1%-5%	0.01	24 t/hm2		5.75	0.08		5.92	0.11
24	2021年	2012-2013年	小区	5.4	Acid	0-15	wheat straw	Straw biochar	＞8	9.3	400-600	500	500	No biochar added	Biochar added	0	1%-5%	0.02	48 t/hm2		5.75	0.08		6.35	0.07
24	2021年	2012-2013年	小区	5.4	Acid	0-15	wheat straw	Straw biochar	＞8	9.3	400-600	500	500	No biochar added	Biochar added	0	1%-5%	0.01	24 t/hm2		5.98	0.2		6.31	0.55
24	2021年	2012-2013年	小区	5.4	Acid	0-15	wheat straw	Straw biochar	＞8	9.3	400-600	500	500	No biochar added	Biochar added	0	1%-5%	0.02	48 t/hm2		5.98	0.2		6.45	0.15
24	2021年	2012-2013年	小区	5.4	Acid	0-15	wheat straw	Straw biochar	＞8	9.3	400-600	500	500	No biochar added	Biochar added	0	1%-5%	0.01	24 t/hm2		5.89	0.2		6.1	0.22
24	2021年	2012-2013年	小区	5.4	Acid	0-15	wheat straw	Straw biochar	＞8	9.3	400-600	500	500	No biochar added	Biochar added	0	1%-5%	0.02	48 t/hm2		5.89	0.2		6.4	0.06
32	2017年	2012-2014年	小区	7.9	Alkaline	0-10	corn straw	Straw biochar	＞8	9.8	400-600	400	400	No biochar added	Biochar added	0	＜1%	0.0042	10 t/hm2		7.87	0.11		7.91	0.07
32	2017年	2012-2014年	小区	7.9	Alkaline	0-10	corn straw	Straw biochar	＞8	9.8	400-600	400	400	No biochar added	Biochar added	0	1%-5%	0.0125	30 t/hm2		7.87	0.11		7.79	0.18
32	2017年	2012-2014年	小区	7.9	Alkaline	10-20	corn straw	Straw biochar	＞8	9.8	400-600	400	400	No biochar added	Biochar added	0	＜1%	0.0042	10 t/hm2		8.01	0.08		8.15	0.18
32	2017年	2012-2014年	小区	7.9	Alkaline	10-20	corn straw	Straw biochar	＞8	9.8	400-600	400	400	No biochar added	Biochar added	0	1%-5%	0.0125	30 t/hm2		8.01	0.08		7.99	0.08
34	2014年	2012年	盆栽	3.78	Acid	0-20	rice straw	Straw biochar	＞8	8.5	400-600	400	400	No biochar added	Biochar added	0	1%-5%	0.01	10 g/kg		3.77	0.01		3.88	0.03
34	2014年	2012年	盆栽	5.31	Acid	0-20	rice straw	Straw biochar	＞8	8.5	400-600	400	400	No biochar added	Biochar added	0	1%-5%	0.01	10 g/kg		5.17	0.03		5.32	0.02
34	2014年	2012年	盆栽	4.55	Acid	0-20	rice straw	Straw biochar	＞8	8.5	400-600	400	400	No biochar added	Biochar added	0	1%-5%	0.01	10 g/kg		4.52	0.04		4.83	0.01
34	2014年	2012年	盆栽	3.78	Acid	0-20	rice straw	Straw biochar	＞8	8.5	400-600	400	400	No biochar added	Biochar added	0	1%-5%	0.01	10 g/kg		3.85	0.01		3.96	0.01
34	2014年	2012年	盆栽	3.77	Acid	0-20	rice straw	Straw biochar	＞8	8.5	400-600	400	400	No biochar added	Biochar added	0	1%-5%	0.01	10 g/kg		3.81	0.02		4.05	0.01
36	2018年	2016年	盆栽	7.79	Alkaline	0-15	Forest logging residues	Wood biochar	＞8	8.89	400-600	500	500	No biochar added	Biochar added	0	＜1%	0.005			7.72	0.03464	0.02	7.73	0.03464	0.02
36	2018年	2016年	盆栽	7.79	Alkaline	0-15	Forest logging residues	Wood biochar	＞8	8.89	400-600	500	500	No biochar added	Biochar added	0	1%-5%	0.01			7.72	0.03464	0.02	7.76	0.05196	0.03
36	2018年	2016年	盆栽	7.79	Alkaline	0-15	Forest logging residues	Wood biochar	＞8	8.89	400-600	500	500	No biochar added	Biochar added	0	1%-5%	0.02			7.72	0.03464	0.02	7.79	0.05196	0.03
36	2018年	2016年	盆栽	7.79	Alkaline	0-15	Forest logging residues	Wood biochar	＞8	8.89	400-600	500	500	No biochar added	Biochar added	0	1%-5%	0.04			7.72	0.03464	0.02	7.83	0.05196	0.03
37	2016年	2014年	小区	5.99	Acid	0-15	wheat straw	Straw biochar	＞8	10.42	400-600	450	350-550	No biochar added	Biochar added	0	＜1%	0.0083	20 t/hm2		5.3	0.03		5.42	0.07
37	2016年	2014年	小区	5.99	Acid	0-15	wheat straw	Straw biochar	＞8	10.42	400-600	450	350-550	No biochar added	Biochar added	0	1%-5%	0.0167	40 t/hm2		5.3	0.03		5.61	0.11
40	2020年	2016年	小区	8.48	Alkaline	0-20	corn straw	Straw biochar	＞8	10.4				No biochar added	Biochar added	0	＜1%	0.0021	5 t/hm2		8.47	0.04		8.33	0.08
40	2020年	2016年	小区	8.48	Alkaline	0-20	corn straw	Straw biochar	＞8	10.4				No biochar added	Biochar added	0	＜1%	0.0042	10 t/hm2		8.47	0.04		8.29	0.06
40	2020年	2016年	小区	8.48	Alkaline	0-20	corn straw	Straw biochar	＞8	10.4				No biochar added	Biochar added	0	＜1%	0.0063	15 t/hm2		8.47	0.04		8.27	0.05
40	2020年	2016年	小区	8.48	Alkaline	0-20	corn straw	Straw biochar	＞8	10.4				No biochar added	Biochar added	0	＜1%	0.0083	20 t/hm2		8.47	0.04		8.15	0.04
40	2020年	2016年	小区	8.48	Alkaline	0-20	corn straw	Straw biochar	＞8	10.4				No biochar added	Biochar added	0	1%-5%	0.0104	25 t/hm2		8.47	0.04		8.26	0.08
40	2020年	2016年	小区	8.48	Alkaline	0-20	corn straw	Straw biochar	＞8	10.4				No biochar added	Biochar added	0	1%-5%	0.0125	30 t/hm2		8.47	0.04		8.28	0.06
40	2020年	2016年	小区	8.48	Alkaline	20-40	corn straw	Straw biochar	＞8	10.4				No biochar added	Biochar added	0	＜1%	0.0021	5 t/hm2		8.47	0.04		8.35	0.04
40	2020年	2016年	小区	8.48	Alkaline	20-40	corn straw	Straw biochar	＞8	10.4				No biochar added	Biochar added	0	＜1%	0.0042	10 t/hm2		8.47	0.04		8.29	0.04
40	2020年	2016年	小区	8.48	Alkaline	20-40	corn straw	Straw biochar	＞8	10.4				No biochar added	Biochar added	0	＜1%	0.0063	15 t/hm2		8.47	0.04		8.28	0.04
40	2020年	2016年	小区	8.48	Alkaline	20-40	corn straw	Straw biochar	＞8	10.4				No biochar added	Biochar added	0	＜1%	0.0083	20 t/hm2		8.47	0.04		8.07	0.07
40	2020年	2016年	小区	8.48	Alkaline	20-40	corn straw	Straw biochar	＞8	10.4				No biochar added	Biochar added	0	1%-5%	0.0104	25 t/hm2		8.47	0.04		8.18	0.04
40	2020年	2016年	小区	8.48	Alkaline	20-40	corn straw	Straw biochar	＞8	10.4				No biochar added	Biochar added	0	1%-5%	0.0125	30 t/hm2		8.47	0.04		8.24	0.02
40	2020年	2016年	小区	8.48	Alkaline	0-20	corn straw	Straw biochar	＞8	10.4				No biochar added	Biochar added	0	＜1%	0.0021	5 t/hm2		8.35	0.1		8.11	0.06
40	2020年	2016年	小区	8.48	Alkaline	0-20	corn straw	Straw biochar	＞8	10.4				No biochar added	Biochar added	0	＜1%	0.0042	10 t/hm2		8.35	0.1		8.03	0.06
40	2020年	2016年	小区	8.48	Alkaline	0-20	corn straw	Straw biochar	＞8	10.4				No biochar added	Biochar added	0	＜1%	0.0063	15 t/hm2		8.35	0.1		7.87	0.1
40	2020年	2016年	小区	8.48	Alkaline	0-20	corn straw	Straw biochar	＞8	10.4				No biochar added	Biochar added	0	＜1%	0.0083	20 t/hm2		8.35	0.1		7.71	0.06
40	2020年	2016年	小区	8.48	Alkaline	0-20	corn straw	Straw biochar	＞8	10.4				No biochar added	Biochar added	0	1%-5%	0.0104	25 t/hm2		8.35	0.1		7.77	0.12
40	2020年	2016年	小区	8.48	Alkaline	0-20	corn straw	Straw biochar	＞8	10.4				No biochar added	Biochar added	0	1%-5%	0.0125	30 t/hm2		8.35	0.1		7.81	0.09
40	2020年	2016年	小区	8.48	Alkaline	20-40	corn straw	Straw biochar	＞8	10.4				No biochar added	Biochar added	0	＜1%	0.0021	5 t/hm2		8.29	0.06		8.17	0.06
40	2020年	2016年	小区	8.48	Alkaline	20-40	corn straw	Straw biochar	＞8	10.4				No biochar added	Biochar added	0	＜1%	0.0042	10 t/hm2		8.29	0.06		8.13	0.1
40	2020年	2016年	小区	8.48	Alkaline	20-40	corn straw	Straw biochar	＞8	10.4				No biochar added	Biochar added	0	＜1%	0.0063	15 t/hm2		8.29	0.06		8.13	0.02
40	2020年	2016年	小区	8.48	Alkaline	20-40	corn straw	Straw biochar	＞8	10.4				No biochar added	Biochar added	0	＜1%	0.0083	20 t/hm2		8.29	0.06		7.93	0.06
40	2020年	2016年	小区	8.48	Alkaline	20-40	corn straw	Straw biochar	＞8	10.4				No biochar added	Biochar added	0	1%-5%	0.0104	25 t/hm2		8.29	0.06		7.96	0.02
40	2020年	2016年	小区	8.48	Alkaline	20-40	corn straw	Straw biochar	＞8	10.4				No biochar added	Biochar added	0	1%-5%	0.0125	30 t/hm2		8.29	0.06		8.12	0.06
48	2014年		盆栽	4.8	Acid	0-10	rice straw	Straw biochar	＞8	9.16	400-600	500	500	No biochar added	Biochar added	0	＜1%	0.0009	2.25 t/ha	2.25 Mg/ha	4.76	0.07		4.8	0.04
48	2014年		盆栽	4.8	Acid	0-10	rice straw	Straw biochar	＞8	9.16	400-600	500	500	No biochar added	Biochar added	0	＜1%	0.0094	22.5 t/ha	22.5 Mg/ha	4.76	0.07		5.05	0.08
48	2014年		盆栽	8.25	Alkaline	0-10	rice straw	Straw biochar	＞8	9.16	400-600	500	500	No biochar added	Biochar added	0	＜1%	0.0009	2.25 t/ha	2.25 Mg/ha	8.43	0.03		8.39	0.03
48	2014年		盆栽	8.25	Alkaline	0-10	rice straw	Straw biochar	＞8	9.16	400-600	500	500	No biochar added	Biochar added	0	＜1%	0.0094	22.5 t/ha	22.5 Mg/ha	8.43	0.03		8.43	0.01
48	2014年		盆栽	4.8	Acid	0-10	rice straw	Straw biochar	＞8	9.16	400-600	500	500	No biochar added	Biochar added	0	＜1%	0.0009	2.25 t/ha	2.25 Mg/ha	4.81	0.02		4.83	0.06
48	2014年		盆栽	4.8	Acid	0-10	rice straw	Straw biochar	＞8	9.16	400-600	500	500	No biochar added	Biochar added	0	＜1%	0.0094	22.5 t/ha	22.5 Mg/ha	4.81	0.02		5.92	0.05
48	2014年		盆栽	8.25	Alkaline	0-10	rice straw	Straw biochar	＞8	9.16	400-600	500	500	No biochar added	Biochar added	0	＜1%	0.0009	2.25 t/ha	2.25 Mg/ha	8.2	0.02		8.23	0.05
48	2014年		盆栽	8.25	Alkaline	0-10	rice straw	Straw biochar	＞8	9.16	400-600	500	500	No biochar added	Biochar added	0	＜1%	0.0094	22.5 t/ha	22.5 Mg/ha	8.2	0.02		8.16	0.03
50	2021年	2018-2019年	小区	5.32	Acid	0-20	tobacco stalks	Straw biochar	＞8	9.5	200-400	380	380	No biochar added	Biochar added	0	＜1%	0.0021	5 t/ha	5 Mg/ha	5.27	0.0866	0.05	5.71	0.38104	0.22
50	2021年	2018-2019年	小区	5.32	Acid	0-20	tobacco stalks	Straw biochar	＞8	9.5	200-400	380	380	No biochar added	Biochar added	0	＜1%	0.0063	15 t/ha	15 Mg/ha	5.27	0.0866	0.05	6.01	0.32908	0.19
50	2021年	2018-2019年	小区	5.32	Acid	0-20	tobacco stalks	Straw biochar	＞8	9.5	200-400	380	380	No biochar added	Biochar added	0	＜1%	0.0083	20 t/ha	20 Mg/ha	5.27	0.0866	0.05	6.12	0.12124	0.07
50	2021年	2018-2019年	小区	5.32	Acid	0-20	tobacco stalks	Straw biochar	＞8	9.5	200-400	380	380	No biochar added	Biochar added	0	1%-5%	0.0167	40 t/ha	40 Mg/ha	5.27	0.0866	0.05	6.25	0.01732	0.01
50	2021年	2018-2019年	小区	6.39	Acid	0-20	tobacco stalks	Straw biochar	＞8	9.5	200-400	380	380	No biochar added	Biochar added	0	＜1%	0.0021	5 t/ha	5 Mg/ha	6.34	0.41568	0.24	6.79	0.12124	0.07
50	2021年	2018-2019年	小区	6.39	Acid	0-20	tobacco stalks	Straw biochar	＞8	9.5	200-400	380	380	No biochar added	Biochar added	0	＜1%	0.0063	15 t/ha	15 Mg/ha	6.34	0.41568	0.24	6.97	0.57156	0.33
50	2021年	2018-2019年	小区	6.39	Acid	0-20	tobacco stalks	Straw biochar	＞8	9.5	200-400	380	380	No biochar added	Biochar added	0	＜1%	0.0083	20 t/ha	20 Mg/ha	6.34	0.41568	0.24	6.99	0.41568	0.24
50	2021年	2018-2019年	小区	6.39	Acid	0-20	tobacco stalks	Straw biochar	＞8	9.5	200-400	380	380	No biochar added	Biochar added	0	1%-5%	0.0167	40 t/ha	40 Mg/ha	6.34	0.41568	0.24	7.23	0.2598	0.15
52	2021年	2015-2019年	盆栽	5.55	Acid	0-20	rice straw	Straw biochar	＜8	7.87	400-600	500	500	No biochar added	Biochar added	0	1%-5%	0.025			5.54	0.24		6.12	0.04
52	2021年	2015-2019年	盆栽	5.55	Acid	0-20	rice straw	Straw biochar	＜8	7.87	400-600	500	500	No biochar added	Biochar added	0	1%-5%	0.025			5.49	0.2		6.03	0.17
52	2021年	2015-2019年	盆栽	5.55	Acid	0-20	rice straw	Straw biochar	＜8	7.87	400-600	500	500	No biochar added	Biochar added	0	1%-5%	0.025			5.37	0.14		5.72	0.06
52	2021年	2015-2019年	盆栽	5.55	Acid	0-20	rice straw	Straw biochar	＜8	7.87	400-600	500	500	No biochar added	Biochar added	0	1%-5%	0.025			5.42	0.02		5.69	0.27
52	2021年	2015-2019年	盆栽	5.55	Acid	0-20	rice straw	Straw biochar	＜8	7.87	400-600	500	500	No biochar added	Biochar added	0	1%-5%	0.025			5.23	0.09		5.71	0.11
53	2021年	2019年	露天栽培	6.4	Acid		Maotai distiller 's grains	Other biochar	＞8	8.8	400-600	550	550	No biochar added	Biochar added	0	＜1%	0.005			6.51	0.0866	0.05	6.53	0.12124	0.07
53	2021年	2019年	露天栽培	6.4	Acid		Maotai distiller 's grains	Other biochar	＞8	8.8	400-600	550	550	No biochar added	Biochar added	0	1%-5%	0.01			6.51	0.0866	0.05	6.53	0.13856	0.08
53	2021年	2019年	露天栽培	6.4	Acid		Maotai distiller 's grains	Other biochar	＞8	8.8	400-600	550	550	No biochar added	Biochar added	0	1%-5%	0.02			6.51	0.0866	0.05	6.59	0.0866	0.05
53	2021年	2019年	露天栽培	6.4	Acid		Maotai distiller 's grains	Other biochar	＞8	8.8	400-600	550	550	No biochar added	Biochar added	0	1%-5%	0.04			6.51	0.0866	0.05	6.62	0.12124	0.07
54	2020年	2017年	盆栽	5.2	Acid		peanut shell	Straw biochar	＞8	8.76	400-600	400	400	No biochar added	Biochar added	0	1%-5%	0.02			5.71	0.571		6.62	0.662
56	2019年	2016年	小区	4.4	Acid	0-20	corn straw	Straw biochar	＞8	10.2	400-600	465	450-480	No biochar added	Biochar added	0	＜1%	0.0004	1 t/ha	1 Mg/ha	4.61	0.1732	0.1	4.65	0.22516	0.13
56	2019年	2016年	小区	4.4	Acid	0-20	corn straw	Straw biochar	＞8	10.2	400-600	465	450-480	No biochar added	Biochar added	0	＜1%	0.0021	5 t/ha	5 Mg/ha	4.61	0.1732	0.1	4.82	0.12124	0.07
56	2019年	2016年	小区	4.4	Acid	0-20	corn straw	Straw biochar	＞8	10.2	400-600	465	450-480	No biochar added	Biochar added	0	＜1%	0.0042	10 t/ha	10 Mg/ha	4.61	0.1732	0.1	4.86	0.1732	0.1
56	2019年	2016年	小区	4.4	Acid	0-20	corn straw	Straw biochar	＞8	10.2	400-600	465	450-480	No biochar added	Biochar added	0	＜1%	0.0083	20 t/ha	20 Mg/ha	4.61	0.1732	0.1	5.22	0.24248	0.14
60	2017年	2015年	室外	5.3	Acid	0-20	wheat straw	Straw biochar	＞8	9.8	400-600	450	450	No biochar added	Biochar added	0	＜1%	0.0083	20 t/ha		5.46	0.546		6.69	0.669
60	2017年	2015年	室外	5.3	Acid	0-20	wheat straw	Straw biochar	＞8	9.8	400-600	450	450	No biochar added	Biochar added	0	＜1%	0.0083	20 t/ha		5.17	0.517		6.64	0.664
60	2017年	2015年	室外	5.3	Acid	0-20	wheat straw	Straw biochar	＞8	9.8	400-600	450	450	No biochar added	Biochar added	0	＜1%	0.0083	20 t/ha		4.97	0.497		6.27	0.627
61	2017年		盆栽	8.07	Alkaline	0-20	wheat straw	Straw biochar	＞8	9.46	400-600	520	520	No biochar added	Biochar added	0	1%-5%	0.015			8.06	0.05		8.15	0.05
61	2017年		盆栽	8.07	Alkaline	0-20	wheat straw	Straw biochar	＞8	9.46	400-600	520	520	No biochar added	Biochar added	0	1%-5%	0.03			8.06	0.05		8.17	0.07
61	2017年		盆栽	8.07	Alkaline	0-20	wheat straw	Straw biochar	＞8	9.46	400-600	520	520	No biochar added	Biochar added	0	5%-10%	0.06			8.06	0.05		8.18	0.03
66	2012年	2007年	小区	8.1	Alkaline	0-20	corncob	Straw biochar	＜8	7.8	200-400	360	360	No biochar added	Biochar added	0	＜1%	0.0009	2.25 t/ha	2250 kg/ha	8.01	0.01		8.07	0.04
66	2012年	2007年	小区	8.1	Alkaline	0-20	corncob	Straw biochar	＜8	7.8	200-400	360	360	No biochar added	Biochar added	0	＜1%	0.0019	4.5 t/ha	4500 kg/ha	8.01	0.01		8.09	0.05
68	2012年		室外	6.5	Neutral	0-15	wheat straw	Straw biochar	＞8	10.4	400-600	450	350-550	No biochar added	Biochar added	0	＜1%	0.0042	10 t/ha		6.53	0.11		6.75	0.08
68	2012年		室外	6.5	Neutral	0-15	wheat straw	Straw biochar	＞8	10.4	400-600	450	350-550	No biochar added	Biochar added	0	＜1%	0.0083	20 t/ha		6.53	0.11		6.77	0.18
68	2012年		室外	6.5	Neutral	0-15	wheat straw	Straw biochar	＞8	10.4	400-600	450	350-550	No biochar added	Biochar added	0	1%-5%	0.0167	40 t/ha		6.53	0.11		6.77	0.12
68	2012年		室外	6.5	Neutral	0-15	wheat straw	Straw biochar	＞8	10.4	400-600	450	350-550	No biochar added	Biochar added	0	＜1%	0.0042	10 t/ha		6.53	0.04		6.73	0.21
68	2012年		室外	6.5	Neutral	0-15	wheat straw	Straw biochar	＞8	10.4	400-600	450	350-550	No biochar added	Biochar added	0	＜1%	0.0083	20 t/ha		6.53	0.04		6.77	0.05
68	2012年		室外	6.5	Neutral	0-15	wheat straw	Straw biochar	＞8	10.4	400-600	450	350-550	No biochar added	Biochar added	0	1%-5%	0.0167	40 t/ha		6.53	0.04		6.89	0.11
76	2015年		盆栽	4.65	Acid	0-15	wheat straw	Straw biochar	＞8	9.92	400-600	450	450	No biochar added	Biochar added	0	1%-5%	0.03			4.63	0.463		5.32	0.532
76	2015年		盆栽	4.65	Acid	0-15	wheat straw	Straw biochar	＞8	9.92	400-600	450	450	No biochar added	Biochar added	0	1%-5%	0.03			5.04	0.504		5.9	0.59
76	2015年		盆栽	4.65	Acid	0-15	wheat straw	Straw biochar	＞8	9.92	400-600	450	450	No biochar added	Biochar added	0	1%-5%	0.03			5.32	0.532		6	0.6
76	2015年		盆栽	4.65	Acid	0-15	wheat straw	Straw biochar	＞8	9.92	400-600	450	450	No biochar added	Biochar added	0	1%-5%	0.03			4.84	0.484		5.45	0.545
76	2015年		盆栽	4.65	Acid	0-15	wheat straw	Straw biochar	＞8	9.92	400-600	450	450	No biochar added	Biochar added	0	1%-5%	0.03			5.13	0.513		5.91	0.591
76	2015年		盆栽	4.65	Acid	0-15	wheat straw	Straw biochar	＞8	9.92	400-600	450	450	No biochar added	Biochar added	0	1%-5%	0.03			6.08	0.608		6.08	0.608
79	2016年	2013年	田间试验	5.78	Acid	0-15	wheat straw	Straw biochar	＞8	9.92	400-600	450	450	No biochar added	Biochar added	0	＜1%	0.0081	19.5 t/ha		5.4	0.3		6	0.2
79	2016年	2013年	田间试验	5.78	Acid	0-15	wheat straw	Straw biochar	＞8	9.92	400-600	450	450	No biochar added	Biochar added	0	＜1%	0.0081	19.5 t/ha		5.4	0.2		6.6	0.1
79	2016年	2013年	田间试验	5.78	Acid	0-15	wheat straw	Straw biochar	＞8	9.92	400-600	450	450	No biochar added	Biochar added	0	＜1%	0.0081	19.5 t/ha		5.3	0.2		6.2	0.4
79	2016年	2013年	田间试验	5.78	Acid	0-15	wheat straw	Straw biochar	＞8	9.92	400-600	450	450	No biochar added	Biochar added	0	＜1%	0.0081	19.5 t/ha		5.2	0		5.7	0.5
79	2016年	2013年	田间试验	5.78	Acid	0-15	wheat straw	Straw biochar	＞8	9.92	400-600	450	450	No biochar added	Biochar added	0	＜1%	0.0081	19.5 t/ha		5.2	0.2		6	0.4
79	2016年	2013年	田间试验	5.78	Acid	0-15	wheat straw	Straw biochar	＞8	9.92	400-600	450	450	No biochar added	Biochar added	0	＜1%	0.0081	19.5 t/ha		5.5	0.6		5.8	0.3
86	2021年	2018年	田间试验	3.84	Acid	0-20	Mushroom substrate	Straw biochar	＞8	9.4	400-600	500	500	No biochar added	Biochar added	0	＜1%	0.0006	1.35 t/ha	1350 kg/ha	3.9	0.02		4	0.05
87	2021年		盆栽	4.61	Acid	0-20	rice straw	Straw biochar	＜8	7.64	200-400	250	250	No biochar added	Biochar added	0	1%-5%	0.01			4.61	0.11		4.89	0.01
87	2021年		盆栽	4.61	Acid	0-20	rice straw	Straw biochar	＞8	9.94	200-400	350	350	No biochar added	Biochar added	0	1%-5%	0.01			4.61	0.11		4.96	0.01
87	2021年		盆栽	4.61	Acid	0-20	rice straw	Straw biochar	＞8	10.6	400-600	450	450	No biochar added	Biochar added	0	1%-5%	0.01			4.61	0.11		4.94	0.02
87	2021年		盆栽	4.61	Acid	0-20	rice straw	Straw biochar	＞8	11.1	400-600	550	550	No biochar added	Biochar added	0	1%-5%	0.01			4.61	0.11		4.98	0.03
87	2021年		盆栽	4.61	Acid	0-20	rice straw	Straw biochar	＞8	11.3	600-800	650	650	No biochar added	Biochar added	0	1%-5%	0.01			4.61	0.11		4.89	0.04
87	2021年		盆栽	4.61	Acid	0-20	rapeseed straw	Straw biochar	＜8	7.19	200-400	250	250	No biochar added	Biochar added	0	1%-5%	0.01			4.61	0.11		5.02	0.02
87	2021年		盆栽	4.61	Acid	0-20	rapeseed straw	Straw biochar	＞8	10.6	200-400	350	350	No biochar added	Biochar added	0	1%-5%	0.01			4.61	0.11		4.96	0.02
87	2021年		盆栽	4.61	Acid	0-20	rapeseed straw	Straw biochar	＞8	10.6	400-600	450	450	No biochar added	Biochar added	0	1%-5%	0.01			4.61	0.11		5.2	0
87	2021年		盆栽	4.61	Acid	0-20	rapeseed straw	Straw biochar	＞8	10.8	400-600	550	550	No biochar added	Biochar added	0	1%-5%	0.01			4.61	0.11		4.72	0.05
87	2021年		盆栽	4.78	Acid	0-20	rice straw	Straw biochar	＜8	7.64	200-400	250	250	No biochar added	Biochar added	0	1%-5%	0.01			5.07	0.15		5.12	0.1
87	2021年		盆栽	4.78	Acid	0-20	rice straw	Straw biochar	＞8	9.94	200-400	350	350	No biochar added	Biochar added	0	1%-5%	0.01			5.07	0.15		5.25	0.13
87	2021年		盆栽	4.78	Acid	0-20	rice straw	Straw biochar	＞8	10.6	400-600	450	450	No biochar added	Biochar added	0	1%-5%	0.01			5.07	0.15		5.37	0.13
87	2021年		盆栽	4.78	Acid	0-20	rice straw	Straw biochar	＞8	11.1	400-600	550	550	No biochar added	Biochar added	0	1%-5%	0.01			5.07	0.15		5.25	0.01
87	2021年		盆栽	4.78	Acid	0-20	rice straw	Straw biochar	＞8	11.3	600-800	650	650	No biochar added	Biochar added	0	1%-5%	0.01			5.07	0.15		5.44	0.07
87	2021年		盆栽	4.78	Acid	0-20	rapeseed straw	Straw biochar	＜8	7.19	200-400	250	250	No biochar added	Biochar added	0	1%-5%	0.01			5.07	0.15		5.07	0.1
87	2021年		盆栽	4.78	Acid	0-20	rapeseed straw	Straw biochar	＞8	10.6	200-400	350	350	No biochar added	Biochar added	0	1%-5%	0.01			5.07	0.15		5.15	0.08
87	2021年		盆栽	4.78	Acid	0-20	rapeseed straw	Straw biochar	＞8	10.6	400-600	450	450	No biochar added	Biochar added	0	1%-5%	0.01			5.07	0.15		5.35	0.21
87	2021年		盆栽	4.78	Acid	0-20	rapeseed straw	Straw biochar	＞8	10.8	400-600	550	550	No biochar added	Biochar added	0	1%-5%	0.01			5.07	0.15		5.27	0.18
87	2021年		盆栽	4.78	Acid	0-20	rapeseed straw	Straw biochar	＞8	11	600-800	650	650	No biochar added	Biochar added	0	1%-5%	0.01			5.07	0.15		5.11	0.03
91	2018年		盆栽	8.29	Alkaline	0-20	peanut shell	Straw biochar	＞8	8.57	200-400	375	300-450	No biochar added	Biochar added	0	1%-5%	0.02	20 g/kg		8.28	0.05196	0.03	7.93	0.41568	0.24
91	2018年		盆栽	8.29	Alkaline	0-20	peanut shell	Straw biochar	＞8	8.57	200-400	375	300-450	No biochar added	Biochar added	0	1%-5%	0.03	30 g/kg		8.28	0.05196	0.03	8.14	0.05196	0.03
91	2018年		盆栽	8.29	Alkaline	0-20	peanut shell	Straw biochar	＞8	8.57	200-400	375	300-450	No biochar added	Biochar added	0	5%-10%	0.05	50 g/kg		8.28	0.05196	0.03	8.15	0.03464	0.02
96	2021年	2016年	室内盆栽	4.33	Acid	0-20	bamboo.	Wood biochar	＞8	11.3	600-800	775	750-800	No biochar added	Biochar added	0	1%-5%	0.025			4.3	0.02		4.74	0.06
96	2021年	2016年	室内盆栽	4.33	Acid	0-20	bamboo.	Wood biochar	＞8	11.3	600-800	775	750-800	No biochar added	Biochar added	0	5%-10%	0.05			4.3	0.02		5.2	0.01
96	2021年	2016年	室内盆栽	4.33	Acid	0-20	rice straw	Straw biochar	＞8	11	400-600	550	550	No biochar added	Biochar added	0	1%-5%	0.025			4.3	0.02		5.11	0.04
96	2021年	2016年	室内盆栽	4.33	Acid	0-20	rice straw	Straw biochar	＞8	11	400-600	550	550	No biochar added	Biochar added	0	5%-10%	0.05			4.3	0.02		5.3	0.11
105	2014年		室内盆栽	4.48	Acid	0-20	rice straw	Straw biochar	＞8	10.3	400-600	500	500	No biochar added	Biochar added	0	5%-10%	0.05			4.48	0.04	0.02	6.03	0.04	0.02
105	2014年		室内盆栽	4.48	Acid	0-20	rice straw	Straw biochar	＞8	10.3	400-600	500	500	No biochar added	Biochar added	0	5%-10%	0.05			4.56	0.04	0.02	6.17	0.02	0.01
111	2022年	2019年	室内盆栽	6.77	Neutral	0-20	corn straw	Straw biochar	＜8	7.59	400-600	400	400	No biochar added	Biochar added	0	1%-5%	0.02			6.67	0.03		6.74	0.03
111	2022年	2019年	室内盆栽	6.77	Neutral	0-20	corn straw	Straw biochar	＜8	7.59	400-600	400	400	No biochar added	Biochar added	0	1%-5%	0.02			6.64	0.01		6.71	0.05
111	2022年	2019年	室内盆栽	6.77	Neutral	0-20	corn straw	Straw biochar	＜8	7.59	400-600	400	400	No biochar added	Biochar added	0	1%-5%	0.02			6.62	0.03		6.69	0.02
111	2022年	2019年	室内盆栽	6.77	Neutral	0-20	corn straw	Straw biochar	＜8	7.59	400-600	400	400	No biochar added	Biochar added	0	1%-5%	0.02			6.71	0.04		6.76	0.02
111	2022年	2019年	室内盆栽	6.77	Neutral	0-20	corn straw	Straw biochar	＜8	7.59	400-600	400	400	No biochar added	Biochar added	0	1%-5%	0.02			6.72	0.01		6.75	0.04
111	2022年	2019年	室内盆栽	6.77	Neutral	0-20	corn straw	Straw biochar	＜8	7.59	400-600	400	400	No biochar added	Biochar added	0	1%-5%	0.02			6.72	0.02		6.75	0.01
112	2021年	2014年	田间试验	4.13	Acid	0-20	wheat straw	Straw biochar	＞8	9.3				No biochar added	Biochar added	0	＜1%	0.0042	10 t/ha	10 Mg/ha	4.4	0.1732	0.1	4.6	0.19052	0.11
112	2021年	2014年	田间试验	4.13	Acid	0-20	wheat straw	Straw biochar	＞8	9.3				No biochar added	Biochar added	0	1%-5%	0.0167	40 t/ha	40 Mg/ha	4.4	0.1732	0.1	4.84	0.19052	0.11
112	2021年	2014年	田间试验	4.13	Acid	0-20	wheat straw	Straw biochar	＞8	9.3				No biochar added	Biochar added	0	＜1%	0.0042	10 t/ha	10 Mg/ha	4.4	0.19052	0.11	4.69	0.1732	0.1
112	2021年	2014年	田间试验	4.13	Acid	0-20	wheat straw	Straw biochar	＞8	9.3				No biochar added	Biochar added	0	1%-5%	0.0167	40 t/ha	40 Mg/ha	4.4	0.19052	0.11	5.14	0.20784	0.12
112	2021年	2014年	田间试验	4.13	Acid	0-20	wheat straw	Straw biochar	＞8	9.3				No biochar added	Biochar added	0	＜1%	0.0042	10 t/ha	10 Mg/ha	4.2	0.1732	0.1	4.39	0.19052	0.11
112	2021年	2014年	田间试验	4.13	Acid	0-20	wheat straw	Straw biochar	＞8	9.3				No biochar added	Biochar added	0	1%-5%	0.0167	40 t/ha	40 Mg/ha	4.2	0.1732	0.1	4.87	0.20784	0.12
112	2021年	2014年	田间试验	4.13	Acid	0-20	wheat straw	Straw biochar	＞8	9.3				No biochar added	Biochar added	0	＜1%	0.0042	10 t/ha	10 Mg/ha	4.14	0.15588	0.09	4.32	0.1732	0.1
112	2021年	2014年	田间试验	4.13	Acid	0-20	wheat straw	Straw biochar	＞8	9.3				No biochar added	Biochar added	0	1%-5%	0.0167	40 t/ha	40 Mg/ha	4.14	0.15588	0.09	4.64	0.19052	0.11
115	2018年	2012年	田间试验	5.7	Acid	0-20	wheat straw	Straw biochar	＞8	9.4	400-600	400	400	No biochar added	Biochar added	0	1%-5%	0.0167	40 t/ha		5.67	0.22516	0.13	6.32	0.15588	0.09
115	2018年	2012年	田间试验	5.7	Acid	0-20	wheat straw	Straw biochar	＞8	9.4	400-600	400	400	No biochar added	Biochar added	0	1%-5%	0.0167	40 t/ha		6.02	0.06928	0.04	6.24	0.13856	0.08
115	2018年	2012年	田间试验	5.7	Acid	0-20	wheat straw	Straw biochar	＞8	9.4	400-600	400	400	No biochar added	Biochar added	0	1%-5%	0.0167	40 t/ha		6.32	0.12124	0.07	6.5	0	0
115	2018年	2012年	田间试验	5.7	Acid	0-20	wheat straw	Straw biochar	＞8	9.4	400-600	400	400	No biochar added	Biochar added	0	1%-5%	0.0167	40 t/ha		5.75	0.0866	0.05	6.06	0.0866	0.05
115	2018年	2012年	田间试验	5.7	Acid	0-20	wheat straw	Straw biochar	＞8	9.4	400-600	400	400	No biochar added	Biochar added	0	1%-5%	0.0167	40 t/ha		5.89	0.13856	0.08	6.11	0.13856	0.08
115	2018年	2012年	田间试验	5.7	Acid	0-20	wheat straw	Straw biochar	＞8	9.4	400-600	400	400	No biochar added	Biochar added	0	1%-5%	0.0167	40 t/ha		5.67	0.22516	0.13	6.24	0.22516	0.13
115	2018年	2012年	田间试验	5.7	Acid	0-20	wheat straw	Straw biochar	＞8	9.4	400-600	400	400	No biochar added	Biochar added	0	1%-5%	0.0167	40 t/ha		6.02	0.06928	0.04	6.5	0.06928	0.04
115	2018年	2012年	田间试验	5.7	Acid	0-20	wheat straw	Straw biochar	＞8	9.4	400-600	400	400	No biochar added	Biochar added	0	1%-5%	0.0167	40 t/ha		6.32	0.12124	0.07	6.5	0.06928	0.04
115	2018年	2012年	田间试验	5.7	Acid	0-20	wheat straw	Straw biochar	＞8	9.4	400-600	400	400	No biochar added	Biochar added	0	1%-5%	0.0167	40 t/ha		5.75	0.0866	0.05	6.06	0.0866	0.05
115	2018年	2012年	田间试验	5.7	Acid	0-20	wheat straw	Straw biochar	＞8	9.4	400-600	400	400	No biochar added	Biochar added	0	1%-5%	0.0167	40 t/ha		5.89	0.13856	0.08	6.32	0.31176	0.18
125	2018年	2015年	小区	5.1	Acid	0-20	wheat straw	Straw biochar	＞8	9.3	400-600	500	500	No biochar added	Biochar added	0	1%-5%	0.01			5.2	0	0	5.5	0	0
125	2018年	2015年	小区	5.1	Acid	0-20	wheat straw	Straw biochar	＞8	9.3	400-600	500	500	No biochar added	Biochar added	0	1%-5%	0.02			5.2	0	0	5.9	0	0
128	2018年	2014年	室内盆栽	5.71	Acid		bamboo.	Wood biochar	＞8	9.5	400-600	450	450	No biochar added	Biochar added	0	＜1%	0.005			5.71	0.05196	0.03	5.96	0.03464	0.02
128	2018年	2014年	室内盆栽	5.71	Acid		bamboo.	Wood biochar	＞8	9.5	400-600	450	450	No biochar added	Biochar added	0	1%-5%	0.01			5.71	0.05196	0.03	6.17	0.0866	0.05
128	2018年	2014年	室内盆栽	5.71	Acid		bamboo.	Wood biochar	＞8	9.5	400-600	450	450	No biochar added	Biochar added	0	1%-5%	0.025			5.71	0.05196	0.03	6.33	0.03464	0.02
128	2018年	2014年	室内盆栽	7.81	Alkaline		bamboo.	Wood biochar	＞8	9.5	400-600	450	450	No biochar added	Biochar added	0	＜1%	0.005			8	0.03464	0.02	8.07	0.03464	0.02
128	2018年	2014年	室内盆栽	7.81	Alkaline		bamboo.	Wood biochar	＞8	9.5	400-600	450	450	No biochar added	Biochar added	0	1%-5%	0.01			8	0.03464	0.02	8.11	0.06928	0.04
128	2018年	2014年	室内盆栽	7.81	Alkaline		bamboo.	Wood biochar	＞8	9.5	400-600	450	450	No biochar added	Biochar added	0	1%-5%	0.025			8	0.03464	0.02	8.13	0.03464	0.02
134	2013年		盆栽	4.31	Acid	0-10	rapeseed straw	Straw biochar	＜8	6.48	200-400	300	300	No biochar added	Biochar added	0	5%-10%	0.0667			3.95	0.01732	0.01	4.3	0.01732	0.01
134	2013年		盆栽	4.31	Acid	0-10	rapeseed straw	Straw biochar	＞8	9.39	400-600	500	500	No biochar added	Biochar added	0	5%-10%	0.0667			3.95	0.01732	0.01	4.6	0	0
134	2013年		盆栽	4.31	Acid	0-10	rapeseed straw	Straw biochar	＞8	10.76	600-800	700	700	No biochar added	Biochar added	0	5%-10%	0.0667			3.95	0.01732	0.01	5.17	0.03464	0.02
134	2013年		盆栽	4.31	Acid	0-10	corn straw	Straw biochar	＞8	9.37	200-400	300	300	No biochar added	Biochar added	0	5%-10%	0.0667			3.95	0.01732	0.01	4.35	0	0
134	2013年		盆栽	4.31	Acid	0-10	corn straw	Straw biochar	＞8	10.77	400-600	500	500	No biochar added	Biochar added	0	5%-10%	0.0667			3.95	0.01732	0.01	4.48	0.01732	0.01
134	2013年		盆栽	4.31	Acid	0-10	corn straw	Straw biochar	＞8	11.32	600-800	700	700	No biochar added	Biochar added	0	5%-10%	0.0667			3.95	0.01732	0.01	4.8	0.01732	0.01
134	2013年		盆栽	4.31	Acid	0-10	soybean straw	Straw biochar	＜8	7.66	200-400	300	300	No biochar added	Biochar added	0	5%-10%	0.0667			3.95	0.01732	0.01	4.36	0	0
134	2013年		盆栽	4.31	Acid	0-10	soybean straw	Straw biochar	＞8	10.92	400-600	500	500	No biochar added	Biochar added	0	5%-10%	0.0667			3.95	0.01732	0.01	4.82	0.05196	0.03
134	2013年		盆栽	4.31	Acid	0-10	soybean straw	Straw biochar	＞8	11.1	600-800	700	700	No biochar added	Biochar added	0	5%-10%	0.0667			3.95	0.01732	0.01	5.2	0.01732	0.01
134	2013年		盆栽	4.31	Acid	0-10	peanut stalk	Straw biochar	＞8	8.6	200-400	300	300	No biochar added	Biochar added	0	5%-10%	0.0667			3.95	0.01732	0.01	4.4	0	0
134	2013年		盆栽	4.31	Acid	0-10	peanut stalk	Straw biochar	＞8	10.86	400-600	500	500	No biochar added	Biochar added	0	5%-10%	0.0667			3.95	0.01732	0.01	4.86	0.01732	0.01
134	2013年		盆栽	4.31	Acid	0-10	peanut stalk	Straw biochar	＞8	11.15	600-800	700	700	No biochar added	Biochar added	0	5%-10%	0.0667			3.95	0.01732	0.01	5.22	0.01732	0.01
136	2015年		盆栽	4.33	Acid	0-10	germ bran	Other biochar	＜8	7.97	200-400	300	300	No biochar added	Biochar added	0	1%-5%	0.01			4.08	0.408		4.35	0.435
136	2015年		盆栽	4.33	Acid	0-10	germ bran	Other biochar	＜8	7.97	200-400	300	300	No biochar added	Biochar added	0	1%-5%	0.02			4.08	0.408		4.55	0.435
140	2021年	2013年	小区	5.8	Acid	0-20	corn straw	Straw biochar	＞8	9.2	400-600	450	450	No biochar added	Biochar added	0	＜1%	0.0066	15.75 t/ha		5.7	0.01		5.78	0.02
140	2021年	2013年	小区	5.8	Acid	0-20	corn straw	Straw biochar	＞8	9.2	400-600	450	450	No biochar added	Biochar added	0	1%-5%	0.0131	31.5 t/ha		5.7	0.01		6	0.05
140	2021年	2013年	小区	5.8	Acid	0-20	corn straw	Straw biochar	＞8	9.2	400-600	450	450	No biochar added	Biochar added	0	1%-5%	0.0197	47.25 t/ha		5.7	0.01		6.15	0.05
146	2016年		盆栽	8.59	Alkaline		wheat straw	Straw biochar	＜8	6.93	200-400	300	300	No biochar added	Biochar added	0	＜1%	0.005	5 g/kg		8.08	0.808		7.88	0.788
146	2016年		盆栽	8.59	Alkaline		wheat straw	Straw biochar	＜8	6.93	200-400	300	300	No biochar added	Biochar added	0	1%-5%	0.01	10 g/kg		8.08	0.808		7.86	0.786
146	2016年		盆栽	8.59	Alkaline		wheat straw	Straw biochar	＜8	6.93	200-400	300	300	No biochar added	Biochar added	0	1%-5%	0.02	20 g/kg		8.08	0.808		7.85	0.785
146	2016年		盆栽	8.59	Alkaline		corn straw	Straw biochar	＞8	8.01	200-400	300	300	No biochar added	Biochar added	0	1%-5%	0.01	10 g/kg		8.08	0.808		8.05	0.805
146	2016年		盆栽	8.59	Alkaline		peanut shell	Straw biochar	＜8	7.71	200-400	300	300	No biochar added	Biochar added	0	1%-5%	0.02	10 g/kg		8.08	0.808		7.99	0.799
148	2012年		田间试验	6.03	Acid	0-15	corncob	Straw biochar	＞8	8.28				No biochar added	Biochar added	0	＜1%	0.0003	0.75 t/ha	750 kg/hm2	6.64	0.02		6.67	0.03
148	2012年		田间试验	6.03	Acid	0-15	corncob	Straw biochar	＞8	8.28				No biochar added	Biochar added	0	＜1%	0.0006	1.5 t/ha	1500 kg/hm2	6.64	0.02		6.82	0.02
148	2012年		田间试验	6.03	Acid	0-15	corncob	Straw biochar	＞8	8.28				No biochar added	Biochar added	0	＜1%	0.0013	3 t/ha	3000 kg/hm2	6.64	0.02		6.94	0.02
148	2012年		田间试验	6.03	Acid	0-15	corncob	Straw biochar	＞8	8.28				No biochar added	Biochar added	0	＜1%	0.0025	6 t/ha	6000 kg/hm2	6.64	0.02		7.09	0.01
155	2018年	2015年	田间试验	5.06	Acid	0-15	rice straw	Straw biochar	＞8	9.71	600-800	600	550-650	No biochar added	Biochar added	0	＜1%	0.0009	2.25 t/ha		5.01	0.501		5.23	0.523
155	2018年	2015年	田间试验	5.06	Acid	0-15	rice straw	Straw biochar	＞8	9.71	600-800	600	550-650	No biochar added	Biochar added	0	＜1%	0.0009	2.25 t/ha		5.09	0.509		5.11	0.511
155	2018年	2015年	田间试验	5.06	Acid	0-15	rice straw	Straw biochar	＞8	9.71	600-800	600	550-650	No biochar added	Biochar added	0	＜1%	0.0009	2.25 t/ha		5.04	0.504		5.16	0.516
161	2014年	2011年	田间试验	5.31	Acid	0-20	wheat straw	Straw biochar	＞8	9.8				No biochar added	Biochar added	0	＜1%	0.0031	7.5 t/ha		5.26	0.12124	0.07	5.43	0.19052	0.11
161	2014年	2011年	田间试验	5.31	Acid	0-20	wheat straw	Straw biochar	＞8	9.8				No biochar added	Biochar added	0	＜1%	0.0094	22.5 t/ha		5.26	0.12124	0.07	5.76	0.29444	0.17
161	2014年	2011年	田间试验	5.31	Acid	0-20	wheat straw	Straw biochar	＞8	9.8				No biochar added	Biochar added	0	＜1%	0.0031	7.5 t/ha		5.74	0.24248	0.14	5.97	0.06928	0.04
161	2014年	2011年	田间试验	5.31	Acid	0-20	wheat straw	Straw biochar	＞8	9.8				No biochar added	Biochar added	0	＜1%	0.0094	22.5 t/ha		5.74	0.24248	0.14	6.4	0.13856	0.08
162	2018年	2014年	温室	7.7	Alkaline	0-20	wheat straw	Straw biochar	＞8	9.9	400-600	450	350-550	No biochar added	Biochar added	0	1%-5%	0.02			8.44	0.844		8.65	0.865
162	2018年	2014年	温室	7.7	Alkaline	0-20	wheat straw	Straw biochar	＞8	9.9	400-600	450	350-550	No biochar added	Biochar added	0	1%-5%	0.04			8.44	0.844		8.68	0.868
162	2018年	2014年	温室	7.7	Alkaline	0-20	wheat straw	Straw biochar	＞8	9.9	400-600	450	350-550	No biochar added	Biochar added	0	5%-10%	0.06			8.44	0.844		8.7	0.87
162	2018年	2014年	温室	7.7	Alkaline	0-20	wheat straw	Straw biochar	＞8	9.9	400-600	450	350-550	No biochar added	Biochar added	0	1%-5%	0.02			8.41	0.841		8.54	0.854
162	2018年	2014年	温室	7.7	Alkaline	0-20	wheat straw	Straw biochar	＞8	9.9	400-600	450	350-550	No biochar added	Biochar added	0	1%-5%	0.04			8.41	0.841		8.56	0.856
162	2018年	2014年	温室	7.7	Alkaline	0-20	wheat straw	Straw biochar	＞8	9.9	400-600	450	350-550	No biochar added	Biochar added	0	5%-10%	0.06			8.41	0.841		8.56	0.856
162	2018年	2014年	温室	7.7	Alkaline	0-20	wheat straw	Straw biochar	＞8	9.9	400-600	450	350-550	No biochar added	Biochar added	0	1%-5%	0.02			8.31	0.831		8.4	0.84
162	2018年	2014年	温室	7.7	Alkaline	0-20	wheat straw	Straw biochar	＞8	9.9	400-600	450	350-550	No biochar added	Biochar added	0	1%-5%	0.04			8.31	0.831		8.43	0.843
162	2018年	2014年	温室	7.7	Alkaline	0-20	wheat straw	Straw biochar	＞8	9.9	400-600	450	350-550	No biochar added	Biochar added	0	5%-10%	0.06			8.31	0.831		8.45	0.845
162	2018年	2014年	温室	7.7	Alkaline	0-20	wheat straw	Straw biochar	＞8	9.9	400-600	450	350-550	No biochar added	Biochar added	0	1%-5%	0.02			8.46	0.846		8.69	0.869
162	2018年	2014年	温室	7.7	Alkaline	0-20	wheat straw	Straw biochar	＞8	9.9	400-600	450	350-550	No biochar added	Biochar added	0	1%-5%	0.04			8.46	0.846		8.71	0.871
162	2018年	2014年	温室	7.7	Alkaline	0-20	wheat straw	Straw biochar	＞8	9.9	400-600	450	350-550	No biochar added	Biochar added	0	5%-10%	0.06			8.46	0.846		8.73	0.873
162	2018年	2014年	温室	7.7	Alkaline	0-20	wheat straw	Straw biochar	＞8	9.9	400-600	450	350-550	No biochar added	Biochar added	0	1%-5%	0.02			8.42	0.842		8.55	0.855
162	2018年	2014年	温室	7.7	Alkaline	0-20	wheat straw	Straw biochar	＞8	9.9	400-600	450	350-550	No biochar added	Biochar added	0	1%-5%	0.04			8.42	0.842		8.56	0.856
162	2018年	2014年	温室	7.7	Alkaline	0-20	wheat straw	Straw biochar	＞8	9.9	400-600	450	350-550	No biochar added	Biochar added	0	5%-10%	0.06			8.42	0.842		8.58	0.858
162	2018年	2014年	温室	7.7	Alkaline	0-20	wheat straw	Straw biochar	＞8	9.9	400-600	450	350-550	No biochar added	Biochar added	0	1%-5%	0.02			8.33	0.833		8.42	0.842
162	2018年	2014年	温室	7.7	Alkaline	0-20	wheat straw	Straw biochar	＞8	9.9	400-600	450	350-550	No biochar added	Biochar added	0	1%-5%	0.04			8.33	0.833		8.44	0.844
162	2018年	2014年	温室	7.7	Alkaline	0-20	wheat straw	Straw biochar	＞8	9.9	400-600	450	350-550	No biochar added	Biochar added	0	5%-10%	0.06			8.33	0.833		8.46	0.846
175	2021年	2019年	野外试验	8.25	Alkaline	0-10	apple branch	Wood biochar	＞8	8.75	400-600	550	550	No biochar added	Biochar added	0	1%-5%	0.025			8.25	0.06		8.18	0.03
175	2021年	2019年	野外试验	8.25	Alkaline	0-10	apple branch	Wood biochar	＞8	8.75	400-600	550	550	No biochar added	Biochar added	0	5%-10%	0.055			8.25	0.06		8.11	0.04
175	2021年	2019年	野外试验	8.25	Alkaline	0-10	apple branch	Wood biochar	＞8	8.75	400-600	550	550	No biochar added	Biochar added	0	5%-10%	0.07			8.25	0.06		7.99	0.01
208	2017年	2014年	室内盆栽	4.3	Acid	0-15	rapeseed straw	Straw biochar	＜8	7.2	400-600	400	400	No biochar added	Biochar added	0	1%-5%	0.01			4.31	0.01732	0.01	4.39	0.03464	0.02
208	2017年	2014年	室内盆栽	4.3	Acid	0-15	peanut stalk	Straw biochar	＞8	8.6	400-600	400	400	No biochar added	Biochar added	0	1%-5%	0.01			4.31	0.01732	0.01	4.54	0.01732	0.01
208	2017年	2014年	室内盆栽	4.3	Acid	0-15	wheat straw	Straw biochar	＜8	7.1	400-600	400	400	No biochar added	Biochar added	0	1%-5%	0.01			4.31	0.01732	0.01	4.67	0.10392	0.06
208	2017年	2014年	室内盆栽	4.3	Acid	0-15	rapeseed straw	Straw biochar	＜8	7.2	400-600	400	400	No biochar added	Biochar added	0	1%-5%	0.01			4.29	0.03464	0.02	4.73	0.10392	0.06
208	2017年	2014年	室内盆栽	4.3	Acid	0-15	peanut stalk	Straw biochar	＞8	8.6	400-600	400	400	No biochar added	Biochar added	0	1%-5%	0.01			4.29	0.03464	0.02	4.4	0.1732	0.1
208	2017年	2014年	室内盆栽	4.3	Acid	0-15	wheat straw	Straw biochar	＜8	7.1	400-600	400	400	No biochar added	Biochar added	0	1%-5%	0.01			4.29	0.03464	0.02	4.51	0.05196	0.03
209	2017年	2014年	盆栽	4.36	Acid	0-15	rapeseed straw	Straw biochar	＜8	7.2	400-600	400	400	No biochar added	Biochar added	0	1%-5%	0.01			3.47	0.347		4.75	0.475
209	2017年	2014年	盆栽	4.36	Acid	0-15	peanut stalk	Straw biochar	＞8	8.6	400-600	400	400	No biochar added	Biochar added	0	＜1%	0.005			3.47	0.347		3.74	0.374
209	2017年	2014年	盆栽	4.36	Acid	0-15	peanut stalk	Straw biochar	＞8	8.6	400-600	400	400	No biochar added	Biochar added	0	1%-5%	0.01			3.47	0.347		4	0.4
209	2017年	2014年	盆栽	4.36	Acid	0-15	peanut stalk	Straw biochar	＞8	8.6	400-600	400	400	No biochar added	Biochar added	0	1%-5%	0.02			3.47	0.347		4.41	0.441
209	2017年	2014年	盆栽	4.36	Acid	0-15	wheat straw	Straw biochar	＜8	7.1	400-600	400	400	No biochar added	Biochar added	0	1%-5%	0.01			3.47	0.347		3.71	0.371
209	2017年	2014年	盆栽	4.36	Acid	0-15	peanut stalk	Straw biochar	＞8	8.6	400-600	400	400	No biochar added	Biochar added	0	1%-5%	0.01			3.69	0.369		4.71	0.471
211	2018年		盆栽	5	Acid		sewage sludge	Other biochar	＞8	8.3	400-600	500	500	No biochar added	Biochar added	0	1%-5%	0.02			4.74	0.11		5.88	0.15
211	2018年		盆栽	5	Acid		sewage sludge	Other biochar	＞8	8.3	400-600	500	500	No biochar added	Biochar added	0	1%-5%	0.04			4.74	0.11		6.56	0.25
211	2018年		盆栽	5	Acid		wheat straw	Straw biochar	＞8	8.6	400-600	500	500	No biochar added	Biochar added	0	1%-5%	0.02			4.74	0.11		4.82	0.19
211	2018年		盆栽	5	Acid		wheat straw	Straw biochar	＞8	8.6	400-600	500	500	No biochar added	Biochar added	0	1%-5%	0.04			4.74	0.11		4.97	0.05
219	2018年	2014年	盆栽	6.03	Acid	0-20	bamboo.	Wood biochar	＞8	9.84	600-800	600	600	No biochar added	Biochar added	0	1%-5%	0.04	40 g/kg		6.42	0.05		6.68	0.12
226	2019年	2010年	小区	6	Acid	0-15	wheat straw	Straw biochar	＞8	10.4	400-600	450	350-550	No biochar added	Biochar added	0	＜1%	0.0083	20 t/ha		5.63	0.563		5.84	0.584
226	2019年	2010年	小区	6	Acid	0-15	wheat straw	Straw biochar	＞8	10.4	400-600	450	350-550	No biochar added	Biochar added	0	1%-5%	0.0167	40 t/ha		5.63	0.563		5.93	0.593
226	2019年	2010年	小区	6	Acid	0-15	wheat straw	Straw biochar	＞8	10.4	400-600	450	350-550	No biochar added	Biochar added	0	＜1%	0.0083	20 t/ha		5.38	0.538		5.49	0.549
226	2019年	2010年	小区	6	Acid	0-15	wheat straw	Straw biochar	＞8	10.4	400-600	450	350-550	No biochar added	Biochar added	0	1%-5%	0.0167	40 t/ha		5.38	0.538		5.79	0.579
229	2017年	2011年	田间试验	6	Acid	0-15	corn straw	Straw biochar	＞8	9.6	400-600	400	400	No biochar added	Biochar added	0	1%-5%	0.02	48 t/ha		5.95	0.1		6.88	0.1
231	2016年	2011年-2012年	田间试验	6.16	Acid	0-20	bamboo.	Wood biochar	＞8	9.8	600-800	600	600	No biochar added	Biochar added	0	＜1%	0.0019	4.5 t/ha		6.01	0.033		6.16	0.066
231	2016年	2011年-2012年	田间试验	6.16	Acid	0-20	rice straw	Straw biochar	＞8	10.2	600-800	600	600	No biochar added	Biochar added	0	＜1%	0.0019	4.5 t/ha		6.01	0.033		6.19	0.063
231	2016年	2011年-2012年	田间试验	6.16	Acid	0-20	bamboo.	Wood biochar	＞8	9.8	600-800	600	600	No biochar added	Biochar added	0	＜1%	0.0019	4.5 t/ha		5.06	0.038		5.13	0.068
231	2016年	2011年-2012年	田间试验	6.16	Acid	0-20	rice straw	Straw biochar	＞8	10.2	600-800	600	600	No biochar added	Biochar added	0	＜1%	0.0019	4.5 t/ha		5.06	0.038		5.16	0.097
232	2015年		室内盆栽	7.05	Neutral	5-20	municipal refuse	Other biochar	＞8	8.31	600-800	600	600	No biochar added	Biochar added	0	＜1%	0.005			7.17	0.717		7.35	0.735
232	2015年		室内盆栽	7.05	Neutral	5-20	municipal refuse	Other biochar	＞8	8.31	600-800	600	600	No biochar added	Biochar added	0	1%-5%	0.01			7.17	0.717		7.4	0.74
232	2015年		室内盆栽	7.05	Neutral	5-20	municipal refuse	Other biochar	＞8	8.31	600-800	600	600	No biochar added	Biochar added	0	1%-5%	0.02			7.17	0.717		7.43	0.743
232	2015年		室内盆栽	7.05	Neutral	5-20	municipal refuse	Other biochar	＞8	8.31	600-800	700	700	No biochar added	Biochar added	0	＜1%	0.005			7.17	0.717		7.34	0.734
232	2015年		室内盆栽	7.05	Neutral	5-20	municipal refuse	Other biochar	＞8	8.31	600-800	700	700	No biochar added	Biochar added	0	1%-5%	0.01			7.17	0.717		7.55	0.755
232	2015年		室内盆栽	7.05	Neutral	5-20	municipal refuse	Other biochar	＞8	8.31	600-800	700	700	No biochar added	Biochar added	0	1%-5%	0.02			7.17	0.717		7.65	0.765
232	2015年		室内盆栽	7.05	Neutral	5-20	municipal refuse	Other biochar	＞8	8.31	600-800	800	800	No biochar added	Biochar added	0	＜1%	0.005			7.17	0.717		7.63	0.763
232	2015年		室内盆栽	7.05	Neutral	5-20	municipal refuse	Other biochar	＞8	8.31	600-800	800	800	No biochar added	Biochar added	0	1%-5%	0.01			7.17	0.717		7.7	0.77
232	2015年		室内盆栽	7.05	Neutral	5-20	municipal refuse	Other biochar	＞8	8.31	600-800	800	800	No biochar added	Biochar added	0	1%-5%	0.02			7.17	0.717		7.79	0.779
233	2014年	2012年	小区	5.1	Acid	0-20	wheat straw	Straw biochar	＞8	9.3	400-600	500	500	No biochar added	Biochar added	0	1%-5%	0.01			5.83	0.583		6.36	0.636
233	2014年	2012年	小区	5.1	Acid	0-20	wheat straw	Straw biochar	＞8	9.3	400-600	500	500	No biochar added	Biochar added	0	1%-5%	0.02			5.83	0.583		6.65	0.665
235	2018年		室内盆栽	4.41	Acid	0-20	peanut shell	Straw biochar	＜8	7.8	400-600	400	400	No biochar added	Biochar added	0	1%-5%	0.02			4.5	0.16	0.08	4.92	0.16	0.08
240	2014年	2009年	田间试验	8.02	Alkaline	0-20	Rice husk and cottonseed hull	Straw biochar	＞8	10.64	400-600	400	400	No biochar added	Biochar added	0	1%-5%	0.0125	30 t/hm2		7.08	0.2598	0.15	7.23	0.3464	0.2
240	2014年	2009年	田间试验	8.02	Alkaline	0-20	Rice husk and cottonseed hull	Straw biochar	＞8	10.64	400-600	400	400	No biochar added	Biochar added	0	1%-5%	0.025	60 t/hm2		7.08	0.2598	0.15	7.22	0.2598	0.15
240	2014年	2009年	田间试验	8.02	Alkaline	0-20	Rice husk and cottonseed hull	Straw biochar	＞8	10.64	400-600	400	400	No biochar added	Biochar added	0	1%-5%	0.0375	90 t/hm2		7.08	0.2598	0.15	7.41	0.48496	0.28
240	2014年	2009年	田间试验	8.02	Alkaline	0-20	Rice husk and cottonseed hull	Straw biochar	＞8	10.64	400-600	400	400	No biochar added	Biochar added	0	1%-5%	0.0125	30 t/hm2		7.66	0.2598	0.15	7.7	0.2598	0.15
240	2014年	2009年	田间试验	8.02	Alkaline	0-20	Rice husk and cottonseed hull	Straw biochar	＞8	10.64	400-600	400	400	No biochar added	Biochar added	0	1%-5%	0.025	60 t/hm2		7.66	0.2598	0.15	7.81	0.39836	0.23
240	2014年	2009年	田间试验	8.02	Alkaline	0-20	Rice husk and cottonseed hull	Straw biochar	＞8	10.64	400-600	400	400	No biochar added	Biochar added	0	1%-5%	0.0375	90 t/hm2		7.66	0.2598	0.15	7.94	0.79672	0.46
241	2021年	2015年	野外试验	8.62	Alkaline	0-20	cotton straw	Straw biochar	＞8	9.37	400-600	400	400	No biochar added	Biochar added	0	＜1%	0.0008	2 t/hm2	2 kg/m2	8.63	0.06928	0.04	8.89	0.03464	0.02
263	2021年	2011年	田间试验	4.54	Acid	0-15	wheat straw	Straw biochar	＞8	10.35	400-600	450	450	No biochar added	Biochar added	0	＜1%	0.001	2.5 t/ha		4.8	0.13856	0.08	4.97	0.10392	0.06
263	2021年	2011年	田间试验	4.54	Acid	0-15	wheat straw	Straw biochar	＞8	10.35	400-600	450	450	No biochar added	Biochar added	0	＜1%	0.0021	5 t/ha		4.8	0.13856	0.08	4.97	0.24248	0.14
263	2021年	2011年	田间试验	4.54	Acid	0-15	wheat straw	Straw biochar	＞8	10.35	400-600	450	450	No biochar added	Biochar added	0	＜1%	0.0042	10 t/ha		4.8	0.13856	0.08	5.12	0.31176	0.18
263	2021年	2011年	田间试验	4.54	Acid	0-15	wheat straw	Straw biochar	＞8	10.35	400-600	450	450	No biochar added	Biochar added	0	＜1%	0.0083	20 t/ha		4.8	0.13856	0.08	5.04	0.19052	0.11
263	2021年	2011年	田间试验	4.54	Acid	0-15	wheat straw	Straw biochar	＞8	10.35	400-600	450	450	No biochar added	Biochar added	0	1%-5%	0.0125	30 t/ha		4.8	0.13856	0.08	5.21	0.29444	0.17
263	2021年	2011年	田间试验	4.54	Acid	0-15	wheat straw	Straw biochar	＞8	10.35	400-600	450	450	No biochar added	Biochar added	0	1%-5%	0.0167	40 t/ha		4.8	0.13856	0.08	5.23	0.10392	0.06
263	2021年	2011年	田间试验	4.54	Acid	0-15	wheat straw	Straw biochar	＞8	10.35	400-600	450	450	No biochar added	Biochar added	0	＜1%	0.0021	5 t/ha		4.81	0.06928	0.04	4.81	0.20784	0.12
263	2021年	2011年	田间试验	4.54	Acid	0-15	wheat straw	Straw biochar	＞8	10.35	400-600	450	450	No biochar added	Biochar added	0	＜1%	0.0042	10 t/ha		4.81	0.06928	0.04	4.87	0.19052	0.11
263	2021年	2011年	田间试验	4.54	Acid	0-15	wheat straw	Straw biochar	＞8	10.35	400-600	450	450	No biochar added	Biochar added	0	＜1%	0.0083	20 t/ha		4.81	0.06928	0.04	4.91	0.12124	0.07
263	2021年	2011年	田间试验	4.54	Acid	0-15	wheat straw	Straw biochar	＞8	10.35	400-600	450	450	No biochar added	Biochar added	0	1%-5%	0.0125	30 t/ha		4.81	0.06928	0.04	4.87	0.15588	0.09
263	2021年	2011年	田间试验	4.54	Acid	0-15	wheat straw	Straw biochar	＞8	10.35	400-600	450	450	No biochar added	Biochar added	0	1%-5%	0.0167	40 t/ha		4.81	0.06928	0.04	5.13	0.24248	0.14
265	2019年	2011年	田间试验	4.24	Acid	0-15	wheat straw	Straw biochar	＞8	10.35	400-600	450	450	No biochar added	Biochar added	0	＜1%	0.001	2.5 t/ha		4.79	0.09		4.84	0.07
265	2019年	2011年	田间试验	4.24	Acid	0-15	wheat straw	Straw biochar	＞8	10.35	400-600	450	450	No biochar added	Biochar added	0	＜1%	0.0021	5 t/ha		4.79	0.09		4.88	0.07
265	2019年	2011年	田间试验	4.24	Acid	0-15	wheat straw	Straw biochar	＞8	10.35	400-600	450	450	No biochar added	Biochar added	0	＜1%	0.0042	10 t/ha		4.79	0.09		5.02	0.08
265	2019年	2011年	田间试验	4.24	Acid	0-15	wheat straw	Straw biochar	＞8	10.35	400-600	450	450	No biochar added	Biochar added	0	＜1%	0.0083	20 t/ha		4.79	0.09		5.19	0.07
265	2019年	2011年	田间试验	4.24	Acid	0-15	wheat straw	Straw biochar	＞8	10.35	400-600	450	450	No biochar added	Biochar added	0	1%-5%	0.0125	30 t/ha		4.79	0.09		5.21	0.05
265	2019年	2011年	田间试验	4.24	Acid	0-15	wheat straw	Straw biochar	＞8	10.35	400-600	450	450	No biochar added	Biochar added	0	1%-5%	0.0167	40 t/ha		4.79	0.09		5.32	0.04
265	2019年	2011年	田间试验	4.24	Acid	0-15	wheat straw	Straw biochar	＞8	10.35	400-600	450	450	No biochar added	Biochar added	0	＜1%	0.001	2.5 t/ha		4.65	0.08		4.76	0.05
265	2019年	2011年	田间试验	4.24	Acid	0-15	wheat straw	Straw biochar	＞8	10.35	400-600	450	450	No biochar added	Biochar added	0	＜1%	0.0021	5 t/ha		4.65	0.08		4.88	0.08
265	2019年	2011年	田间试验	4.24	Acid	0-15	wheat straw	Straw biochar	＞8	10.35	400-600	450	450	No biochar added	Biochar added	0	＜1%	0.0042	10 t/ha		4.65	0.08		4.8	0.08
265	2019年	2011年	田间试验	4.24	Acid	0-15	wheat straw	Straw biochar	＞8	10.35	400-600	450	450	No biochar added	Biochar added	0	＜1%	0.0083	20 t/ha		4.65	0.08		4.91	0.06
265	2019年	2011年	田间试验	4.24	Acid	0-15	wheat straw	Straw biochar	＞8	10.35	400-600	450	450	No biochar added	Biochar added	0	1%-5%	0.0125	30 t/ha		4.65	0.08		5.04	0.06
265	2019年	2011年	田间试验	4.24	Acid	0-15	wheat straw	Straw biochar	＞8	10.35	400-600	450	450	No biochar added	Biochar added	0	1%-5%	0.0167	40 t/ha		4.65	0.08		5.04	0.08
265	2019年	2011年	田间试验	4.24	Acid	0-15	wheat straw	Straw biochar	＞8	10.35	400-600	450	450	No biochar added	Biochar added	0	＜1%	0.001	2.5 t/ha		4.63	0.05		4.75	0.08
265	2019年	2011年	田间试验	4.24	Acid	0-15	wheat straw	Straw biochar	＞8	10.35	400-600	450	450	No biochar added	Biochar added	0	＜1%	0.0021	5 t/ha		4.63	0.05		4.73	0.07
265	2019年	2011年	田间试验	4.24	Acid	0-15	wheat straw	Straw biochar	＞8	10.35	400-600	450	450	No biochar added	Biochar added	0	＜1%	0.0042	10 t/ha		4.63	0.05		4.8	0.07
265	2019年	2011年	田间试验	4.24	Acid	0-15	wheat straw	Straw biochar	＞8	10.35	400-600	450	450	No biochar added	Biochar added	0	＜1%	0.0083	20 t/ha		4.63	0.05		4.88	0.05
265	2019年	2011年	田间试验	4.24	Acid	0-15	wheat straw	Straw biochar	＞8	10.35	400-600	450	450	No biochar added	Biochar added	0	1%-5%	0.0125	30 t/ha		4.63	0.05		4.81	0.07
265	2019年	2011年	田间试验	4.24	Acid	0-15	wheat straw	Straw biochar	＞8	10.35	400-600	450	450	No biochar added	Biochar added	0	1%-5%	0.0167	40 t/ha		4.63	0.05		5.02	0.04
265	2019年	2011年	田间试验	4.24	Acid	0-15	wheat straw	Straw biochar	＞8	10.35	400-600	450	450	No biochar added	Biochar added	0	＜1%	0.001	2.5 t/ha		4.57	0.07		4.6	0.06
265	2019年	2011年	田间试验	4.24	Acid	0-15	wheat straw	Straw biochar	＞8	10.35	400-600	450	450	No biochar added	Biochar added	0	＜1%	0.0021	5 t/ha		4.57	0.07		4.76	0.07
265	2019年	2011年	田间试验	4.24	Acid	0-15	wheat straw	Straw biochar	＞8	10.35	400-600	450	450	No biochar added	Biochar added	0	＜1%	0.0042	10 t/ha		4.57	0.07		4.73	0.07
265	2019年	2011年	田间试验	4.24	Acid	0-15	wheat straw	Straw biochar	＞8	10.35	400-600	450	450	No biochar added	Biochar added	0	＜1%	0.0083	20 t/ha		4.57	0.07		4.79	0.04
265	2019年	2011年	田间试验	4.24	Acid	0-15	wheat straw	Straw biochar	＞8	10.35	400-600	450	450	No biochar added	Biochar added	0	1%-5%	0.0125	30 t/ha		4.57	0.07		4.8	0.07
265	2019年	2011年	田间试验	4.24	Acid	0-15	wheat straw	Straw biochar	＞8	10.35	400-600	450	450	No biochar added	Biochar added	0	1%-5%	0.0167	40 t/ha		4.57	0.07		4.75	0.05
265	2019年	2011年	田间试验	4.24	Acid	0-15	wheat straw	Straw biochar	＞8	10.35	400-600	450	450	No biochar added	Biochar added	0	＜1%	0.001	2.5 t/ha		4.34	0.04		4.36	0.07
265	2019年	2011年	田间试验	4.24	Acid	0-15	wheat straw	Straw biochar	＞8	10.35	400-600	450	450	No biochar added	Biochar added	0	＜1%	0.0021	5 t/ha		4.34	0.04		4.36	0.05
265	2019年	2011年	田间试验	4.24	Acid	0-15	wheat straw	Straw biochar	＞8	10.35	400-600	450	450	No biochar added	Biochar added	0	＜1%	0.0042	10 t/ha		4.34	0.04		4.58	0.06
265	2019年	2011年	田间试验	4.24	Acid	0-15	wheat straw	Straw biochar	＞8	10.35	400-600	450	450	No biochar added	Biochar added	0	＜1%	0.0083	20 t/ha		4.34	0.04		4.52	0.04
265	2019年	2011年	田间试验	4.24	Acid	0-15	wheat straw	Straw biochar	＞8	10.35	400-600	450	450	No biochar added	Biochar added	0	1%-5%	0.0125	30 t/ha		4.34	0.04		4.65	0.04
265	2019年	2011年	田间试验	4.24	Acid	0-15	wheat straw	Straw biochar	＞8	10.35	400-600	450	450	No biochar added	Biochar added	0	1%-5%	0.0167	40 t/ha		4.34	0.04		4.66	0.05
276	2017年		盆栽	5.8	Acid	0-20	rice hull	Straw biochar	＞8	10.4	600-800	600	600	No biochar added	Biochar added	0	＜1%	0.0083	20 t/ha	20 Mg/ha	5.75	0.02		5.82	0.03
276	2017年		盆栽	5.8	Acid	0-20	rice hull	Straw biochar	＞8	10.4	600-800	600	600	No biochar added	Biochar added	0	1%-5%	0.0167	40 t/ha	40 Mg/ha	5.75	0.02		5.89	0.02
283	2018年	2013年	田间试验	5.6	Acid	0-20	wheat straw	Straw biochar	＞8	10.7	400-600	450	450	No biochar added	Biochar added	0	＜1%	0.0031	7.5 t/ha		6.07	0.12	0.06	6.07	0.12	0.06
283	2018年	2013年	田间试验	5.6	Acid	0-20	wheat straw	Straw biochar	＞8	10.7	400-600	450	450	No biochar added	Biochar added	0	＜1%	0.0063	15 t/ha		6.07	0.12	0.06	6.19	0.08	0.04
283	2018年	2013年	田间试验	5.6	Acid	0-20	wheat straw	Straw biochar	＞8	10.7	400-600	450	450	No biochar added	Biochar added	0	＜1%	0.0031	7.5 t/ha		5.66	0.04	0.02	6.09	0.08	0.04
283	2018年	2013年	田间试验	5.6	Acid	0-20	wheat straw	Straw biochar	＞8	10.7	400-600	450	450	No biochar added	Biochar added	0	＜1%	0.0063	15 t/ha		5.66	0.04	0.02	6.21	0.12	0.06
293	2019年		盆栽	5.9	Acid		wheat straw	Straw biochar	＞8	10				No biochar added	Biochar added	0	1%-5%	0.02			5.9	0.3464	0.2	6.5	0.0866	0.05
301	2020年	2017年	田间试验	6.7	Neutral	0-15	corn straw	Straw biochar	＞8	9.2	400-600	500	500	No biochar added	Biochar added	0	1%-5%	0.04			6.69	0.13856	0.08	7.08	0.06928	0.04
301	2020年	2017年	田间试验	6.7	Neutral	0-15	corn straw	Straw biochar	＞8	9.2	400-600	500	500	No biochar added	Biochar added	0	5%-10%	0.08			6.69	0.13856	0.08	7.14	0.06928	0.04
301	2020年	2017年	田间试验	6.7	Neutral	0-15	corn straw	Straw biochar	＞8	9.2	400-600	500	500	No biochar added	Biochar added	0	10%-20%	0.12			6.69	0.13856	0.08	7.17	0.10392	0.06
302	2021年		室内盆栽	8.08	Alkaline	0-20	sewage sludge	Other biochar	＞8	9				No biochar added	Biochar added	0	1%-5%	0.01			8.08	0.02		8.26	0.03
302	2021年		室内盆栽	8.08	Alkaline	0-20	sewage sludge	Other biochar	＞8	9				No biochar added	Biochar added	0	1%-5%	0.01			7.22	0.03		7.62	0.03
303	2018年	2010年-2016年	田间试验	8.16	Alkaline	0-20	peanut shell	Straw biochar	＞8	9.12	400-600	500	500	No biochar added	Biochar added	0	1%-5%	0.01			8.03	0.803		8.36	0.836
303	2018年	2010年-2016年	田间试验	8.16	Alkaline	0-20	peanut shell	Straw biochar	＞8	9.12	400-600	500	500	No biochar added	Biochar added	0	1%-5%	0.01			8.3	0.83		8.24	0.824
303	2018年	2010年-2016年	田间试验	8.16	Alkaline	0-20	peanut shell	Straw biochar	＞8	9.12	400-600	500	500	No biochar added	Biochar added	0	1%-5%	0.01			8.23	0.823		8.39	0.839
303	2018年	2010年-2016年	田间试验	8.16	Alkaline	0-20	peanut shell	Straw biochar	＞8	9.12	400-600	500	500	No biochar added	Biochar added	0	1%-5%	0.01			8.3	0.83		8.24	0.824
319	2016年	2013年	小区	7.9	Alkaline	0-20	corn straw	Straw biochar	＞8	9.2				No biochar added	Biochar added	0	＜1%	0.0083	20 t/hm2		8.18	0.12124	0.07	8.4	0.20784	0.12
322	2020年	2018年	盆栽	5.87	Acid	0-20	bamboo residue	Wood biochar	＞8	8.32				No biochar added	Biochar added	0	1%-5%	0.03			5.56	0.0866	0.05	6.33	0.10392	0.06
322	2020年	2018年	盆栽	5.87	Acid	0-20	bamboo residue	Wood biochar	＞8	8.32				No biochar added	Biochar added	0	5%-10%	0.06			5.56	0.0866	0.05	6.67	0.0866	0.05
322	2020年	2018年	盆栽	5.87	Acid	0-20	bamboo residue	Wood biochar	＞8	8.32				No biochar added	Biochar added	0	1%-5%	0.03			3.83	0.19052	0.11	4.17	0.0866	0.05
322	2020年	2018年	盆栽	5.87	Acid	0-20	bamboo residue	Wood biochar	＞8	8.32				No biochar added	Biochar added	0	5%-10%	0.06			3.83	0.19052	0.11	4.56	0.0866	0.05
324	2018年	2016年	田间试验	5.37	Acid	0-20	rice straw	Straw biochar	＞8	9.93	400-600	500	500	No biochar added	Biochar added	0	5%-10%	0.05			5.36	0.05		5.59	0.02
324	2018年	2016年	田间试验	5.37	Acid	0-20	rice straw	Straw biochar	＞8	9.93	400-600	500	500	No biochar added	Biochar added	0	10%-20%	0.1			5.36	0.05		5.63	0.05
324	2018年	2016年	田间试验	5.37	Acid	0-20	rice straw	Straw biochar	＞8	9.93	400-600	500	500	No biochar added	Biochar added	0	10%-20%	0.15			5.36	0.05		5.69	0.06
324	2018年	2016年	田间试验	5.37	Acid	0-20	rice straw	Straw biochar	＞8	9.93	400-600	500	500	No biochar added	Biochar added	0	10%-20%	0.2			5.36	0.05		5.74	0.03
326	2017年	2011年	大田	5.93	Acid	0-15	wheat straw	Straw biochar	＞8	10.4	400-600	450	350-550	No biochar added	Biochar added	0	＜1%	0.0083	20 t/ha		5.93	0.6062	0.35	6.11	0.15588	0.09
326	2017年	2011年	大田	5.93	Acid	0-15	wheat straw	Straw biochar	＞8	10.4	400-600	450	350-550	No biochar added	Biochar added	0	1%-5%	0.0167	40 t/ha		5.93	0.6062	0.35	6.46	0.03464	0.02
332	2015年	2010年	田间试验	4.89	Acid	0-20	wheat straw	Straw biochar	＞8	10.42	400-600	450	350-550	No biochar added	Biochar added	0	＜1%	0.0083	20 t/ha		4.88	0.05		4.99	0.13
332	2015年	2010年	田间试验	4.89	Acid	0-20	wheat straw	Straw biochar	＞8	10.42	400-600	450	350-550	No biochar added	Biochar added	0	1%-5%	0.0167	40 t/ha		4.88	0.05		5.12	0.01
332	2015年	2010年	田间试验	6.21	Acid	0-20	wheat straw	Straw biochar	＞8	10.42	400-600	450	350-550	No biochar added	Biochar added	0	＜1%	0.0083	20 t/ha		6.01	0.06		6.15	0.02
332	2015年	2010年	田间试验	6.21	Acid	0-20	wheat straw	Straw biochar	＞8	10.42	400-600	450	350-550	No biochar added	Biochar added	0	1%-5%	0.0167	40 t/ha		6.01	0.06		6.29	0.15
332	2015年	2010年	田间试验	5.99	Acid	0-20	wheat straw	Straw biochar	＞8	10.42	400-600	450	350-550	No biochar added	Biochar added	0	＜1%	0.0083	20 t/ha		5.54	0.23		5.89	0.05
332	2015年	2010年	田间试验	5.99	Acid	0-20	wheat straw	Straw biochar	＞8	10.42	400-600	450	350-550	No biochar added	Biochar added	0	1%-5%	0.0167	40 t/ha		5.54	0.23		6.26	0.17
333	2015年	2010年	田间试验	5.99	Acid	0-20	wheat straw	Straw biochar	＞8	10.4	400-600	450	350-550	No biochar added	Biochar added	0	＜1%	0.0083	20 t/ha		6.09	0.06		6.14	0.07
333	2013年	2010年	田间试验	5.99	Acid	0-20	wheat straw	Straw biochar	＞8	10.4	400-600	450	350-550	No biochar added	Biochar added	0	1%-5%	0.0167	40 t/ha		6.09	0.06		6.65	0.05
342	2021年	2011年	田间试验	5.24	Acid	0-20	rice straw	Straw biochar	＞8	10.4	400-600	550	550	No biochar added	Biochar added	0	＜1%	0.0047	11.3 t/ha	11.3 Mg/ha	5.51	0.05196	0.03	6.23	0.15588	0.09
342	2021年	2011年	田间试验	8.22	Alkaline	0-20	rice straw	Straw biochar	＞8	10.4	400-600	550	550	No biochar added	Biochar added	0	＜1%	0.0047	11.3 t/ha	11.3 Mg/ha	8.73	0.03464	0.02	8.78	0.15588	0.09
342	2021年	2011年	田间试验	5.24	Acid	0-20	rice straw	Straw biochar	＞8	10.4	400-600	550	550	No biochar added	Biochar added	0	＜1%	0.0047	11.3 t/ha	11.3 Mg/ha	5.42	0.06928	0.04	6.5	0.05196	0.03
342	2021年	2011年	田间试验	8.22	Alkaline	0-20	rice straw	Straw biochar	＞8	10.4	400-600	550	550	No biochar added	Biochar added	0	＜1%	0.0047	11.3 t/ha	11.3 Mg/ha	8.75	0.36372	0.21	8.68	0.10392	0.06
342	2021年	2011年	田间试验	5.24	Acid	0-20	rice straw	Straw biochar	＞8	10.4	400-600	550	550	No biochar added	Biochar added	0	＜1%	0.0047	11.3 t/ha	11.3 Mg/ha	5.32	0.29444	0.17	6.26	0.0866	0.05
342	2021年	2011年	田间试验	8.22	Alkaline	0-20	rice straw	Straw biochar	＞8	10.4	400-600	550	550	No biochar added	Biochar added	0	＜1%	0.0047	11.3 t/ha	11.3 Mg/ha	8.36	0.2598	0.15	8.52	0.3464	0.2
353	2020年	2018年	田间试验	5.18	Acid	0-20	rice straw	Straw biochar	＞8	10.4	600-800	650	650	No biochar added	Biochar added	0	＜1%	0.0083	20 t/ha		5.11	0.06928	0.04	5.15	0	0
353	2020年	2018年	田间试验	5.18	Acid	0-20	rice straw	Straw biochar	＞8	10.4	600-800	650	650	No biochar added	Biochar added	0	1%-5%	0.0167	40 t/ha		5.11	0.06928	0.04	5.31	0	0
353	2020年	2018年	田间试验	5.18	Acid	0-20	rice straw	Straw biochar	＞8	10.4	600-800	650	650	No biochar added	Biochar added	0	＜1%	0.0083	20 t/ha		5.06	0.506		5.15	0.515
353	2020年	2018年	田间试验	5.18	Acid	0-20	rice straw	Straw biochar	＞8	10.4	600-800	650	650	No biochar added	Biochar added	0	1%-5%	0.0167	40 t/ha		5.06	0.506		5.1	0.51
366	2020年		室内盆栽	5.91	Acid	15-25	tobacco stalks	Straw biochar	＞8	10.3	400-600	450	450	No biochar added	Biochar added	0	1%-5%	0.02			5.9	0.28		7.58	0.39
370	2020年	2017年	盆栽	7.02	Neutral	0-20	corn straw	Straw biochar	＞8	8.89	600-800	600	600	No biochar added	Biochar added	0	5%-10%	0.05			7.31	0.35		7.61	0.32
370	2020年	2017年	盆栽	7.02	Neutral	0-20	corn straw	Straw biochar	＞8	8.89	600-800	600	600	No biochar added	Biochar added	0	10%-20%	0.1			7.31	0.35		7.81	0.15
370	2020年	2017年	盆栽	7.02	Neutral	0-20	corn straw	Straw biochar	＞8	8.89	600-800	600	600	No biochar added	Biochar added	0	10%-20%	0.15			7.31	0.35		8.06	0.1
370	2020年	2017年	盆栽	7.02	Neutral	0-20	corn straw	Straw biochar	＞8	8.89	600-800	600	600	No biochar added	Biochar added	0	10%-20%	0.2			7.31	0.35		8.18	0.15
370	2020年	2017年	盆栽	7.02	Neutral	0-20	corn straw	Straw biochar	＞8	8.89	600-800	600	600	No biochar added	Biochar added	0	5%-10%	0.05			7.24	0.1		7.46	0.03
370	2020年	2017年	盆栽	7.02	Neutral	0-20	corn straw	Straw biochar	＞8	8.89	600-800	600	600	No biochar added	Biochar added	0	10%-20%	0.1			7.24	0.1		7.51	0.23
370	2020年	2017年	盆栽	7.02	Neutral	0-20	corn straw	Straw biochar	＞8	8.89	600-800	600	600	No biochar added	Biochar added	0	10%-20%	0.15			7.24	0.1		7.49	0.05
370	2020年	2017年	盆栽	7.02	Neutral	0-20	corn straw	Straw biochar	＞8	8.89	600-800	600	600	No biochar added	Biochar added	0	10%-20%	0.2			7.24	0.1		8.03	0.1
392	2020年	2010年	盆栽	4.8	Acid	0-20	rice straw	Straw biochar	＞8	9.16	400-600	500	500	No biochar added	Biochar added	0	＜1%	0.0009	2.25 t/ha	2.25 Mg/ha	4.77	0.477		4.81	0.481
392	2020年	2010年	盆栽	4.8	Acid	0-20	rice straw	Straw biochar	＞8	9.16	400-600	500	500	No biochar added	Biochar added	0	＜1%	0.0094	22.5 t/ha	22.5 Mg/ha	4.77	0.477		5.05	0.505
392	2020年	2010年	盆栽	4.8	Acid	0-20	rice straw	Straw biochar	＞8	9.16	400-600	500	500	No biochar added	Biochar added	0	＜1%	0.0009	2.25 t/ha	2.25 Mg/ha	4.6	0.46		4.77	0.477
392	2020年	2010年	盆栽	4.8	Acid	0-20	rice straw	Straw biochar	＞8	9.16	400-600	500	500	No biochar added	Biochar added	0	＜1%	0.0094	22.5 t/ha	22.5 Mg/ha	4.6	0.46		6.18	0.618
392	2020年	2010年	盆栽	4.8	Acid	0-20	rice straw	Straw biochar	＞8	9.16	400-600	500	500	No biochar added	Biochar added	0	＜1%	0.0009	2.25 t/ha	2.25 Mg/ha	4.39	0.439		4.53	0.453
392	2020年	2010年	盆栽	4.8	Acid	0-20	rice straw	Straw biochar	＞8	9.16	400-600	500	500	No biochar added	Biochar added	0	＜1%	0.0094	22.5 t/ha	22.5 Mg/ha	4.39	0.439		6.45	0.645
392	2020年	2010年	盆栽	4.8	Acid	0-20	rice straw	Straw biochar	＞8	9.16	400-600	500	500	No biochar added	Biochar added	0	＜1%	0.0009	2.25 t/ha	2.25 Mg/ha	4.7	0.47		5.05	0.505
392	2020年	2010年	盆栽	4.8	Acid	0-20	rice straw	Straw biochar	＞8	9.16	400-600	500	500	No biochar added	Biochar added	0	＜1%	0.0094	22.5 t/ha	22.5 Mg/ha	4.7	0.47		7.28	0.728
392	2020年	2010年	盆栽	4.8	Acid	0-20	rice straw	Straw biochar	＞8	9.16	400-600	500	500	No biochar added	Biochar added	0	＜1%	0.0009	2.25 t/ha	2.25 Mg/ha	4.12	0.412		4.6	0.46
392	2020年	2010年	盆栽	4.8	Acid	0-20	rice straw	Straw biochar	＞8	9.16	400-600	500	500	No biochar added	Biochar added	0	＜1%	0.0094	22.5 t/ha	22.5 Mg/ha	4.12	0.412		7.18	0.718
392	2020年	2010年	盆栽	4.8	Acid	0-20	rice straw	Straw biochar	＞8	9.16	400-600	500	500	No biochar added	Biochar added	0	＜1%	0.0009	2.25 t/ha	2.25 Mg/ha	4.81	0.481		4.84	0.484
392	2020年	2010年	盆栽	4.8	Acid	0-20	rice straw	Straw biochar	＞8	9.16	400-600	500	500	No biochar added	Biochar added	0	＜1%	0.0094	22.5 t/ha	22.5 Mg/ha	4.81	0.481		5.94	0.594
392	2020年	2010年	盆栽	4.8	Acid	0-20	rice straw	Straw biochar	＞8	9.16	400-600	500	500	No biochar added	Biochar added	0	＜1%	0.0009	2.25 t/ha	2.25 Mg/ha	5.08	0.508		5.22	0.522
392	2020年	2010年	盆栽	4.8	Acid	0-20	rice straw	Straw biochar	＞8	9.16	400-600	500	500	No biochar added	Biochar added	0	＜1%	0.0094	22.5 t/ha	22.5 Mg/ha	5.08	0.508		6.76	0.676
392	2020年	2010年	盆栽	4.8	Acid	0-20	rice straw	Straw biochar	＞8	9.16	400-600	500	500	No biochar added	Biochar added	0	＜1%	0.0094	22.5 t/ha	22.5 Mg/ha	4.91	0.491		6.56	0.656
392	2020年	2010年	盆栽	4.8	Acid	0-20	rice straw	Straw biochar	＞8	9.16	400-600	500	500	No biochar added	Biochar added	0	＜1%	0.0009	2.25 t/ha	2.25 Mg/ha	4.81	0.481		5.12	0.512
392	2020年	2010年	盆栽	4.8	Acid	0-20	rice straw	Straw biochar	＞8	9.16	400-600	500	500	No biochar added	Biochar added	0	＜1%	0.0094	22.5 t/ha	22.5 Mg/ha	4.81	0.481		7.31	0.731
392	2020年	2010年	盆栽	4.8	Acid	0-20	rice straw	Straw biochar	＞8	9.16	400-600	500	500	No biochar added	Biochar added	0	＜1%	0.0009	2.25 t/ha	2.25 Mg/ha	3.78	0.378		4.53	0.453
392	2020年	2010年	盆栽	4.8	Acid	0-20	rice straw	Straw biochar	＞8	9.16	400-600	500	500	No biochar added	Biochar added	0	＜1%	0.0094	22.5 t/ha	22.5 Mg/ha	3.78	0.378		7.07	0.707
393	2020年	2014年	田间试验	4.65	Acid	0-15	wheat straw	Straw biochar	＞8	10.9	400-600	450	450	No biochar added	Biochar added	0	＜1%	0.0083	20 t/ha		4.09	0.1732	0.1	4.43	0.19052	0.11
394	2019年	2017年	田间试验	8.34	Alkaline	0-30	oil palm empty fruit bunch	Wood biochar	＜8	7.25	600-800	600	600	No biochar added	Biochar added	0	＜1%	0.0042	10 t/ha		7.99	0.05196	0.03	7.62	0.10392	0.06
394	2019年	2017年	田间试验	8.34	Alkaline	0-30	oil palm empty fruit bunch	Wood biochar	＜8	7.25	600-800	600	600	No biochar added	Biochar added	0	＜1%	0.0042	10 t/ha		8.02	0.06928	0.04	7.95	0.06928	0.04
396	2019年		室内盆栽	5.21	Acid	0-15	corn cob	Straw biochar	＞8	10.12	600-800	500	500	No biochar added	Biochar added	0	5%-10%	0.05			5.21	0.14		6.82	0.18
396	2019年		室内盆栽	5.21	Acid	0-15	rice hull	Straw biochar	＞8	8.94	400-600	500	500	No biochar added	Biochar added	0	5%-10%	0.05			5.21	0.14		6.78	0.16
396	2019年		室内盆栽	5.21	Acid	0-15	peanut shell	Straw biochar	＞8	9.33	400-600	500	500	No biochar added	Biochar added	0	5%-10%	0.05			5.21	0.14		6.41	0.15
400	2020年	2014年	田间试验	8.17	Alkaline	0-20	corn straw	Straw biochar	＞8	10.62	400-600	450	450	No biochar added	Biochar added	0	1%-5%	0.01			8.46	0.01		8.47	0.04
400	2020年	2014年	田间试验	8.17	Alkaline	0-20	corn straw	Straw biochar	＞8	10.62	400-600	450	450	No biochar added	Biochar added	0	1%-5%	0.01			8.42	0.01		8.41	0.03
400	2020年	2014年	田间试验	8.17	Alkaline	0-20	corn straw	Straw biochar	＞8	10.62	400-600	450	450	No biochar added	Biochar added	0	1%-5%	0.01			8.39	0.02		8.37	0.02
400	2020年	2014年	田间试验	8.17	Alkaline	0-20	corn straw	Straw biochar	＞8	10.62	400-600	450	450	No biochar added	Biochar added	0	1%-5%	0.01			8.37	0		8.38	0.04
402	2020年	2014年	田间试验	8.17	Alkaline	0-20	corn straw	Straw biochar	＞8	10.62	400-600	450	450	No biochar added	Biochar added	0	＜1%	0.001	2.5 t/hm2		8.16	0.01		8.16	0.06
402	2020年	2014年	田间试验	8.17	Alkaline	0-20	corn straw	Straw biochar	＞8	10.62	400-600	450	450	No biochar added	Biochar added	0	＜1%	0.0031	7.5 t/hm2		8.16	0.01		8.19	0.06
402	2020年	2014年	田间试验	8.17	Alkaline	0-20	corn straw	Straw biochar	＞8	10.62	400-600	450	450	No biochar added	Biochar added	0	＜1%	0.0094	22.5 t/hm2		8.16	0.01		8.15	0
402	2020年	2014年	田间试验	8.17	Alkaline	0-20	corn straw	Straw biochar	＞8	10.62	400-600	450	450	No biochar added	Biochar added	0	＜1%	0.001	2.5 t/hm2		8.39	0.02		8.43	0.08
402	2020年	2014年	田间试验	8.17	Alkaline	0-20	corn straw	Straw biochar	＞8	10.62	400-600	450	450	No biochar added	Biochar added	0	＜1%	0.0031	7.5 t/hm2		8.39	0.02		8.44	0.03
402	2020年	2014年	田间试验	8.17	Alkaline	0-20	corn straw	Straw biochar	＞8	10.62	400-600	450	450	No biochar added	Biochar added	0	＜1%	0.0094	22.5 t/hm2		8.39	0.02		8.37	0.02
413	2020年		室外	6.25	Acid	0-20	rice straw	Straw biochar	＞8	10.05	600-800	700	700	No biochar added	Biochar added	0	＜1%	0.5%	5 g/kg		6.19	0.01		6.25	0.07
413	2020年		室外	6.25	Acid	0-20	rice straw	Straw biochar	＞8	10.05	600-800	700	700	No biochar added	Biochar added	0	1%-5%	1%	10 g/kg		6.19	0.01		6.3	0.06
413	2020年		室外	6.25	Acid	0-20	rice straw	Straw biochar	＞8	10.05	600-800	700	700	No biochar added	Biochar added	0	1%-5%	2%	20 g/kg		6.19	0.01		6.47	0.03
413	2020年		室外	6.25	Acid	0-20	rice straw	Straw biochar	＞8	10.05	600-800	700	700	No biochar added	Biochar added	0	5%-10%	5%	50 g/kg		6.19	0.01		6.8	0.05
413	2020年		室外	6.25	Acid	0-20	rice hull	Straw biochar	＞8	10.63	600-800	700	700	No biochar added	Biochar added	0	＜1%	0.5%	5 g/kg		6.19	0.02		6.48	0.02
413	2020年		室外	6.25	Acid	0-20	rice hull	Straw biochar	＞8	10.63	600-800	700	700	No biochar added	Biochar added	0	1%-5%	1%	10 g/kg		6.19	0.02		6.69	0.09
413	2020年		室外	6.25	Acid	0-20	rice hull	Straw biochar	＞8	10.63	600-800	700	700	No biochar added	Biochar added	0	1%-5%	2%	20 g/kg		6.19	0.02		6.98	0.01
413	2020年		室外	6.25	Acid	0-20	rice hull	Straw biochar	＞8	10.63	600-800	700	700	No biochar added	Biochar added	0	5%-10%	5%	50 g/kg		6.19	0.02		7.8	0.04
413	2020年		室外	6.3	Acid	0-20	rice straw	Straw biochar	＞8	10.05	600-800	700	700	No biochar added	Biochar added	0	＜1%	0.5%	5 g/kg		6.31	0.06		6.31	0.06
413	2020年		室外	6.3	Acid	0-20	rice straw	Straw biochar	＞8	10.05	600-800	700	700	No biochar added	Biochar added	0	1%-5%	1%	10 g/kg		6.31	0.06		6.32	0.06
413	2020年		室外	6.3	Acid	0-20	rice straw	Straw biochar	＞8	10.05	600-800	700	700	No biochar added	Biochar added	0	1%-5%	2%	20 g/kg		6.31	0.06		6.38	0.02
413	2020年		室外	6.3	Acid	0-20	rice straw	Straw biochar	＞8	10.05	600-800	700	700	No biochar added	Biochar added	0	5%-10%	5%	50 g/kg		6.31	0.06		6.55	0.06
413	2020年		室外	6.3	Acid	0-20	rice hull	Straw biochar	＞8	10.63	600-800	700	700	No biochar added	Biochar added	0	＜1%	0.5%	5 g/kg		6.19	0.11		6.36	0.03
413	2020年		室外	6.3	Acid	0-20	rice hull	Straw biochar	＞8	10.63	600-800	700	700	No biochar added	Biochar added	0	1%-5%	1%	10 g/kg		6.19	0.11		6.48	0.06
413	2020年		室外	6.3	Acid	0-20	rice hull	Straw biochar	＞8	10.63	600-800	700	700	No biochar added	Biochar added	0	1%-5%	2%	20 g/kg		6.19	0.11		6.8	0.04
413	2020年		室外	6.3	Acid	0-20	rice hull	Straw biochar	＞8	10.63	600-800	700	700	No biochar added	Biochar added	0	5%-10%	5%	50 g/kg		6.19	0.11		7.51	0.08
413	2020年		室外	6.25	Acid	0-20	rice straw	Straw biochar	＞8	10.05	600-800	700	700	No biochar added	Biochar added	0	＜1%	0.5%	5 g/kg		6.22	0.07		6.35	0.04
413	2020年		室外	6.25	Acid	0-20	rice straw	Straw biochar	＞8	10.05	600-800	700	700	No biochar added	Biochar added	0	1%-5%	1%	10 g/kg		6.22	0.07		6.41	0.04
413	2020年		室外	6.25	Acid	0-20	rice straw	Straw biochar	＞8	10.05	600-800	700	700	No biochar added	Biochar added	0	1%-5%	2%	20 g/kg		6.22	0.07		6.51	0.05
413	2020年		室外	6.25	Acid	0-20	rice straw	Straw biochar	＞8	10.05	600-800	700	700	No biochar added	Biochar added	0	5%-10%	5%	50 g/kg		6.22	0.07		6.84	0.12
413	2020年		室外	6.25	Acid	0-20	rice hull	Straw biochar	＞8	10.63	600-800	700	700	No biochar added	Biochar added	0	＜1%	0.5%	5 g/kg		6.32	0.04		6.53	0.05
413	2020年		室外	6.25	Acid	0-20	rice hull	Straw biochar	＞8	10.63	600-800	700	700	No biochar added	Biochar added	0	1%-5%	1%	10 g/kg		6.32	0.04		6.75	0.06
413	2020年		室外	6.25	Acid	0-20	rice hull	Straw biochar	＞8	10.63	600-800	700	700	No biochar added	Biochar added	0	1%-5%	2%	20 g/kg		6.32	0.04		7.02	0.04
413	2020年		室外	6.25	Acid	0-20	rice hull	Straw biochar	＞8	10.63	600-800	700	700	No biochar added	Biochar added	0	5%-10%	5%	50 g/kg		6.32	0.04		7.83	0.02
413	2020年		室外	6.3	Acid	0-20	rice straw	Straw biochar	＞8	10.05	600-800	700	700	No biochar added	Biochar added	0	＜1%	0.5%	5 g/kg		6.32	0.06		6.35	0.04
413	2020年		室外	6.3	Acid	0-20	rice straw	Straw biochar	＞8	10.05	600-800	700	700	No biochar added	Biochar added	0	1%-5%	1%	10 g/kg		6.32	0.06		6.41	0.08
413	2020年		室外	6.3	Acid	0-20	rice straw	Straw biochar	＞8	10.05	600-800	700	700	No biochar added	Biochar added	0	1%-5%	2%	20 g/kg		6.32	0.06		6.45	0.07
413	2020年		室外	6.3	Acid	0-20	rice straw	Straw biochar	＞8	10.05	600-800	700	700	No biochar added	Biochar added	0	5%-10%	5%	50 g/kg		6.32	0.06		6.59	0.01
413	2020年		室外	6.3	Acid	0-20	rice hull	Straw biochar	＞8	10.63	600-800	700	700	No biochar added	Biochar added	0	1%-5%	1%	10 g/kg		6.39	0.07		6.52	0.04
413	2020年		室外	6.3	Acid	0-20	rice hull	Straw biochar	＞8	10.63	600-800	700	700	No biochar added	Biochar added	0	1%-5%	2%	20 g/kg		6.39	0.07		6.82	0.08
413	2020年		室外	6.3	Acid	0-20	rice hull	Straw biochar	＞8	10.63	600-800	700	700	No biochar added	Biochar added	0	5%-10%	5%	50 g/kg		6.39	0.07		7.54	0.09
413	2020年		室外	6.25	Acid	0-20	rice straw	Straw biochar	＞8	10.05	600-800	700	700	No biochar added	Biochar added	0	＜1%	0.5%	5 g/kg		6.24	0.08		6.28	0.11
413	2020年		室外	6.25	Acid	0-20	rice straw	Straw biochar	＞8	10.05	600-800	700	700	No biochar added	Biochar added	0	1%-5%	1%	10 g/kg		6.24	0.08		6.38	0.08
413	2020年		室外	6.25	Acid	0-20	rice straw	Straw biochar	＞8	10.05	600-800	700	700	No biochar added	Biochar added	0	1%-5%	2%	20 g/kg		6.24	0.08		6.51	0.08
413	2020年		室外	6.25	Acid	0-20	rice straw	Straw biochar	＞8	10.05	600-800	700	700	No biochar added	Biochar added	0	5%-10%	5%	50 g/kg		6.24	0.08		6.87	0.15
413	2020年		室外	6.25	Acid	0-20	rice hull	Straw biochar	＞8	10.63	600-800	700	700	No biochar added	Biochar added	0	＜1%	0.5%	5 g/kg		6.35	0.05		6.54	0.05
413	2020年		室外	6.25	Acid	0-20	rice hull	Straw biochar	＞8	10.63	600-800	700	700	No biochar added	Biochar added	0	1%-5%	1%	10 g/kg		6.35	0.05		6.75	0.04
413	2020年		室外	6.25	Acid	0-20	rice hull	Straw biochar	＞8	10.63	600-800	700	700	No biochar added	Biochar added	0	1%-5%	2%	20 g/kg		6.35	0.05		7.01	0.01
413	2020年		室外	6.25	Acid	0-20	rice hull	Straw biochar	＞8	10.63	600-800	700	700	No biochar added	Biochar added	0	5%-10%	5%	50 g/kg		6.35	0.05		7.89	0.04
413	2020年		室外	6.3	Acid	0-20	rice straw	Straw biochar	＞8	10.05	600-800	700	700	No biochar added	Biochar added	0	1%-5%	1%	10 g/kg		6.31	0.08		6.33	0.05
413	2020年		室外	6.3	Acid	0-20	rice straw	Straw biochar	＞8	10.05	600-800	700	700	No biochar added	Biochar added	0	1%-5%	2%	20 g/kg		6.31	0.08		6.38	0.01
413	2020年		室外	6.3	Acid	0-20	rice straw	Straw biochar	＞8	10.05	600-800	700	700	No biochar added	Biochar added	0	5%-10%	5%	50 g/kg		6.31	0.08		6.58	0.03
413	2020年		室外	6.3	Acid	0-20	rice hull	Straw biochar	＞8	10.63	600-800	700	700	No biochar added	Biochar added	0	＜1%	0.5%	5 g/kg		6.27	0.05		6.35	0.06
413	2020年		室外	6.3	Acid	0-20	rice hull	Straw biochar	＞8	10.63	600-800	700	700	No biochar added	Biochar added	0	1%-5%	1%	10 g/kg		6.27	0.05		6.44	0.06
413	2020年		室外	6.3	Acid	0-20	rice hull	Straw biochar	＞8	10.63	600-800	700	700	No biochar added	Biochar added	0	1%-5%	2%	20 g/kg		6.27	0.05		6.81	0.07
413	2020年		室外	6.3	Acid	0-20	rice hull	Straw biochar	＞8	10.63	600-800	700	700	No biochar added	Biochar added	0	5%-10%	5%	50 g/kg		6.27	0.05		7.59	0.09
419	2019年	2016年	田间试验	8.3	Alkaline	0-20	cotton straw	Straw biochar	＞8	8.6	600-800	800	800	No biochar added	Biochar added	0	＜1%	0.0042	10 t/ha		8.2	0.82		8	0.8
419	2019年	2016年	田间试验	8.3	Alkaline	0-20	cotton straw	Straw biochar	＞8	8.6	600-800	800	800	No biochar added	Biochar added	0	＜1%	0.0042	10 t/ha		8	0.8		7.8	0.78
425	2020年	2015年	田间试验	4.35	Acid	0-20	rice straw	Straw biochar	＞8	10	400-600	450	400-500	No biochar added	Biochar added	0	＜1%	0.0016	3.75 t/ha		4.45	0.03464	0.02	4.56	0.10392	0.06
425	2020年	2015年	田间试验	4.35	Acid	0-20	rapeseed straw	Straw biochar	＞8	9.49	400-600	450	400-500	No biochar added	Biochar added	0	＜1%	0.0016	3.75 t/ha		4.45	0.03464	0.02	4.65	0.0866	0.05
425	2020年	2015年	田间试验	4.35	Acid	0-20	peanut stalk	Straw biochar	＞8	10.54	400-600	450	400-500	No biochar added	Biochar added	0	＜1%	0.0016	3.75 t/ha		4.45	0.03464	0.02	4.78	0.10392	0.06
438	2019年	2014年	盆栽	4.96	Acid		corn straw	Straw biochar	＞8	8.56	400-600	450	450	No biochar added	Biochar added	0	1%-5%	0.02	20 g/kg		4.94	0.19052	0.11	5.36	0.03464	0.02
438	2019年	2014年	盆栽	4.96	Acid		corn straw	Straw biochar	＞8	8.56	400-600	450	450	No biochar added	Biochar added	0	1%-5%	0.03	30 g/kg		4.94	0.19052	0.11	5.52	0.15588	0.09
438	2019年	2014年	盆栽	4.96	Acid		corn straw	Straw biochar	＞8	8.56	400-600	450	450	No biochar added	Biochar added	0	1%-5%	0.02	20 g/kg		4.96	0.10392	0.06	5.26	0.10392	0.06
438	2019年	2014年	盆栽	4.96	Acid		corn straw	Straw biochar	＞8	8.56	400-600	450	450	No biochar added	Biochar added	0	1%-5%	0.03	30 g/kg		4.96	0.10392	0.06	5.29	0.10392	0.06
441	2020年	2019年	田间试验	8.32	Alkaline	0-20	corn straw	Straw biochar	＞8	8.7	400-600	400	400	No biochar added	Biochar added	0	1%-5%	0.0167	40 t/ha		8.4	0.01732	0.01	8.32	0.01732	0.01
441	2020年	2019年	田间试验	8.32	Alkaline	0-20	corn straw	Straw biochar	＞8	8.7	400-600	400	400	No biochar added	Biochar added	0	1%-5%	0.0167	40 t/ha		8.38	0.01732	0.01	8.32	0.01732	0.01
442	2020年	2017年	露天盆栽	8.25	Alkaline	0-15	corn straw	Straw biochar	＜8	7.94	400-600	450	450	No biochar added	Biochar added	0	1%-5%	0.025			8.25	0.06	0.03	8.23	0.04	0.02
442	2020年	2017年	露天盆栽	8.25	Alkaline	0-15	corn straw	Straw biochar	＜8	7.94	400-600	450	450	No biochar added	Biochar added	0	5%-10%	0.05			8.25	0.06	0.03	8.18	0.04	0.02
442	2020年	2017年	露天盆栽	8.25	Alkaline	0-15	corn straw	Straw biochar	＜8	7.94	400-600	450	450	No biochar added	Biochar added	0	10%-20%	0.1			8.25	0.06	0.03	8.01	0.06	0.03
445	2016年	2013年	室内盆栽	6.9	Neutral		rice straw	Straw biochar	＞8	9.2	400-600	550	550	No biochar added	Biochar added	0	＜1%	0.002			6.38	0.638		6.56	0.656
445	2016年	2013年	室内盆栽	6.9	Neutral		rice straw	Straw biochar	＞8	9.2	400-600	550	550	No biochar added	Biochar added	0	1%-5%	0.01			6.38	0.638		7.12	0.712
445	2016年	2013年	室内盆栽	6.9	Neutral		rice straw	Straw biochar	＞8	9.2	400-600	550	550	No biochar added	Biochar added	0	5%-10%	0.05			6.38	0.638		7.72	0.772
448	2021年		室内盆栽	5.52	Acid	5-10	rapeseed	Straw biochar	＞8	10.4	400-600	500	500	No biochar added	Biochar added	0	＜1%	0.008			5.41	0.05196	0.03	5.49	0.03464	0.02
448	2021年		室内盆栽	5.52	Acid	5-10	rapeseed	Straw biochar	＞8	10.4	400-600	500	500	No biochar added	Biochar added	0	1%-5%	0.02			5.41	0.05196	0.03	5.7	0.10392	0.06
448	2021年		室内盆栽	5.52	Acid	5-10	rapeseed	Straw biochar	＞8	10.4	400-600	500	500	No biochar added	Biochar added	0	1%-5%	0.04			5.41	0.05196	0.03	6.32	0.03464	0.02
456	2020年	2017年	露天盆栽	8.97	Alkaline	0-20	tree branches	Wood biochar	＞8	8.8	600-800	600	600	No biochar added	Biochar added	0	＜1%	0.0021	5 t/ha		8.85	0.885		8.76	0.876
456	2020年	2017年	露天盆栽	8.97	Alkaline	0-20	tree branches	Wood biochar	＞8	8.8	600-800	600	600	No biochar added	Biochar added	0	＜1%	0.0063	15 t/ha		8.85	0.885		8.81	0.881
456	2020年	2017年	露天盆栽	8.97	Alkaline	0-20	tree branches	Wood biochar	＞8	8.8	600-800	600	600	No biochar added	Biochar added	0	1%-5%	0.0104	25 t/ha		8.85	0.885		8.91	0.891
462	2019年	2014年	田间试验	7.84	Alkaline	0-20	corn straw	Straw biochar	＜8	7.94	400-600	450	450	No biochar added	Biochar added	0	＜1%	0.0042	10 t/ha		8.21	0.02		8.32	0.02
462	2019年	2014年	田间试验	7.84	Alkaline	0-20	corn straw	Straw biochar	＜8	7.94	400-600	450	450	No biochar added	Biochar added	0	＜1%	0.0083	20 t/ha		8.21	0.02		8.35	0.04
462	2019年	2014年	田间试验	7.84	Alkaline	0-20	corn straw	Straw biochar	＜8	7.94	400-600	450	450	No biochar added	Biochar added	0	1%-5%	0.0167	40 t/ha		8.21	0.02		8.35	0.02
462	2019年	2014年	田间试验	7.84	Alkaline	0-20	corn straw	Straw biochar	＜8	7.94	400-600	450	450	No biochar added	Biochar added	0	1%-5%	0.033	80 t/ha		8.21	0.02		8.37	0.04
462	2019年	2014年	田间试验	7.84	Alkaline	0-20	corn straw	Straw biochar	＜8	7.94	400-600	450	450	No biochar added	Biochar added	0	＜1%	0.0042	10 t/ha		8.22	0.03		8.18	8.2
462	2019年	2014年	田间试验	7.84	Alkaline	0-20	corn straw	Straw biochar	＜8	7.94	400-600	450	450	No biochar added	Biochar added	0	＜1%	0.0083	20 t/ha		8.22	0.03		8.23	0.04
462	2019年	2014年	田间试验	7.84	Alkaline	0-20	corn straw	Straw biochar	＜8	7.94	400-600	450	450	No biochar added	Biochar added	0	1%-5%	0.0167	40 t/ha		8.22	0.03		8.21	8.25
462	2019年	2014年	田间试验	7.84	Alkaline	0-20	corn straw	Straw biochar	＜8	7.94	400-600	450	450	No biochar added	Biochar added	0	1%-5%	0.033	80 t/ha		8.22	0.03		8.19	8.21
462	2019年	2014年	田间试验	7.84	Alkaline	0-20	corn straw	Straw biochar	＜8	7.94	400-600	450	450	No biochar added	Biochar added	0	＜1%	0.0042	10 t/ha		8.04	0.03		8.1	0.07
462	2019年	2014年	田间试验	7.84	Alkaline	0-20	corn straw	Straw biochar	＜8	7.94	400-600	450	450	No biochar added	Biochar added	0	＜1%	0.0083	20 t/ha		8.04	0.03		8.08	0.07
462	2019年	2014年	田间试验	7.84	Alkaline	0-20	corn straw	Straw biochar	＜8	7.94	400-600	450	450	No biochar added	Biochar added	0	1%-5%	0.0167	40 t/ha		8.04	0.03		8.05	0.01
462	2019年	2014年	田间试验	7.84	Alkaline	0-20	corn straw	Straw biochar	＜8	7.94	400-600	450	450	No biochar added	Biochar added	0	1%-5%	0.033	80 t/ha		8.04	0.03		8.05	0.07
463	2019年	2009年	田间试验	8.02	Alkaline	0-20	Rice husk and cottonseed hull	Straw biochar	＞8	10.64	400-600	400	400	No biochar added	Biochar added	0	1%-5%	0.0125	30 t/hm2		7.66	0.20784	0.12	7.7	0.13856	0.08
463	2019年	2009年	田间试验	8.02	Alkaline	0-20	Rice husk and cottonseed hull	Straw biochar	＞8	10.64	400-600	400	400	No biochar added	Biochar added	0	1%-5%	0.025	60 t/hm2		7.66	0.20784	0.12	7.81	0.20784	0.12
463	2019年	2009年	田间试验	8.02	Alkaline	0-20	Rice husk and cottonseed hull	Straw biochar	＞8	10.64	400-600	400	400	No biochar added	Biochar added	0	1%-5%	0.0375	90 t/hm2		7.66	0.20784	0.12	7.93	0.793
468	2019年		室内盆栽	5.5	Acid	0-20	Potato stem	Straw biochar	＞8	9.89	400-600	550	550	No biochar added	Biochar added	0	＜1%	0.005	5 g/kg		5.49	0.02	0.01	5.54	0.06	0.03
468	2019年		室内盆栽	5.5	Acid	0-20	Potato stem	Straw biochar	＞8	9.89	400-600	550	550	No biochar added	Biochar added	0	1%-5%	0.01	10 g/kg		5.49	0.02	0.01	5.84	0.18	0.09
468	2019年		室内盆栽	5.5	Acid	0-20	Potato stem	Straw biochar	＞8	9.89	400-600	550	550	No biochar added	Biochar added	0	＜1%	0.005	5 g/kg		5.67	0.06	0.03	5.75	0.04	0.02
468	2019年		室内盆栽	5.5	Acid	0-20	Potato stem	Straw biochar	＞8	9.89	400-600	550	550	No biochar added	Biochar added	0	1%-5%	0.01	10 g/kg		5.67	0.06	0.03	5.9	0.18	0.09
468	2019年		室内盆栽	5.5	Acid	0-20	Potato stem	Straw biochar	＞8	9.89	400-600	550	550	No biochar added	Biochar added	0	1%-5%	0.01	10 g/kg		6.3	0.1	0.05	6.55	0.12	0.06
473	2020年		盆栽	6.38	Acid		wheat straw	Straw biochar	＞8	9.51	400-600	500	500	No biochar added	Biochar added	0	＜1%	0.005			7.05	0.05		7.08	0.07
473	2020年		盆栽	6.38	Acid		wheat straw	Straw biochar	＞8	9.51	400-600	500	500	No biochar added	Biochar added	0	1%-5%	0.01			7.05	0.05		7.15	0.03
473	2020年		盆栽	6.38	Acid		wheat straw	Straw biochar	＞8	9.51	400-600	500	500	No biochar added	Biochar added	0	＜1%	0.005			7.06	0.02		7.06	0.01
473	2020年		盆栽	6.38	Acid		wheat straw	Straw biochar	＞8	9.51	400-600	500	500	No biochar added	Biochar added	0	1%-5%	0.01			7.06	0.02		7.13	0.03
473	2020年		盆栽	5.05	Acid		wheat straw	Straw biochar	＞8	9.51	400-600	500	500	No biochar added	Biochar added	0	＜1%	0.005			5.77	0.01		5.83	0.06
473	2020年		盆栽	5.05	Acid		wheat straw	Straw biochar	＞8	9.51	400-600	500	500	No biochar added	Biochar added	0	1%-5%	0.01			5.77	0.01		5.86	0.01
473	2020年		盆栽	5.05	Acid		wheat straw	Straw biochar	＞8	9.51	400-600	500	500	No biochar added	Biochar added	0	＜1%	0.005			5.68	0.02		5.76	0.04
473	2020年		盆栽	5.05	Acid		wheat straw	Straw biochar	＞8	9.51	400-600	500	500	No biochar added	Biochar added	0	1%-5%	0.01			5.68	0.02		5.85	0.01
474	2022年	2021年	田间试验	6.01	Acid	0-20	rice straw	Straw biochar	＞8	9.28	400-600	450	450	No biochar added	Biochar added	0	＜1%	0.0031	7.5 t/ha		6.12	0.612		6.43	0.643
474	2022年	2021年	田间试验	6.01	Acid	0-20	rice straw	Straw biochar	＞8	9.28	400-600	450	450	No biochar added	Biochar added	0	＜1%	0.0031	7.5 t/ha		6.12	0.612		6.38	0.638
474	2022年	2021年	田间试验	6.01	Acid	0-20	rice straw	Straw biochar	＞8	9.28	400-600	450	450	No biochar added	Biochar added	0	＜1%	0.0031	7.5 t/ha		6.12	0.612		6.35	0.635
474	2022年	2021年	田间试验	6.01	Acid	0-20	rice straw	Straw biochar	＞8	9.28	400-600	450	450	No biochar added	Biochar added	0	＜1%	0.0031	7.5 t/ha		6.11	0.611		6.62	0.662
474	2022年	2021年	田间试验	6.01	Acid	0-20	rice straw	Straw biochar	＞8	9.28	400-600	450	450	No biochar added	Biochar added	0	＜1%	0.0031	7.5 t/ha		6.11	0.611		6.55	0.655
474	2022年	2021年	田间试验	6.01	Acid	0-20	rice straw	Straw biochar	＞8	9.28	400-600	450	450	No biochar added	Biochar added	0	＜1%	0.0031	7.5 t/ha		6.11	0.611		6.6	0.66
474	2022年	2021年	田间试验	6.01	Acid	0-20	rice straw	Straw biochar	＞8	9.28	400-600	450	450	No biochar added	Biochar added	0	＜1%	0.0031	7.5 t/ha		6.17	0.617		6.56	0.656
474	2022年	2021年	田间试验	6.01	Acid	0-20	rice straw	Straw biochar	＞8	9.28	400-600	450	450	No biochar added	Biochar added	0	＜1%	0.0031	7.5 t/ha		6.17	0.617		6.6	0.66
474	2022年	2021年	田间试验	6.01	Acid	0-20	rice straw	Straw biochar	＞8	9.28	400-600	450	450	No biochar added	Biochar added	0	＜1%	0.0031	7.5 t/ha		6.17	0.617		6.61	0.661
476	2022年	2020年	盆栽	6.8	Neutral		rice hull	Straw biochar	＞8	8.69				No biochar added	Biochar added	0	1%-5%	0.04	40 g/kg		6.52	0.13856	0.08	6.85	0.32908	0.19
476	2022年	2020年	盆栽	8.8	Alkaline		rice hull	Straw biochar	＞8	8.69				No biochar added	Biochar added	0	1%-5%	0.04	40 g/kg		8.89	0.2598	0.15	9.05	0.45032	0.26
482	2020年	2014年	田间试验	6.03	Acid	0-10	corn straw	Straw biochar	＞8	9.81	400-600	550	550	No biochar added	Biochar added	0	＜1%	0.0042	10 t/ha		6.03	0.06928	0.04	6.2	0.10392	0.06
482	2020年	2014年	田间试验	6.03	Acid	0-10	corn straw	Straw biochar	＞8	9.81	400-600	550	550	No biochar added	Biochar added	0	＜1%	0.0083	20 t/ha		6.03	0.06928	0.04	6.35	0.10392	0.06
482	2020年	2014年	田间试验	6.03	Acid	0-10	corn straw	Straw biochar	＞8	9.81	400-600	550	550	No biochar added	Biochar added	0	1%-5%	0.0125	30 t/ha		6.03	0.06928	0.04	7.02	0.13856	0.08
482	2020年	2014年	田间试验	6.03	Acid	0-20	corn straw	Straw biochar	＞8	9.81	400-600	550	550	No biochar added	Biochar added	0	＜1%	0.0042	10 t/ha		6.01	0.0866	0.05	6.19	0.03464	0.02
482	2020年	2014年	田间试验	6.03	Acid	0-20	corn straw	Straw biochar	＞8	9.81	400-600	550	550	No biochar added	Biochar added	0	＜1%	0.0083	20 t/ha		6.01	0.0866	0.05	6.34	0.05196	0.03
482	2020年	2014年	田间试验	6.03	Acid	0-20	corn straw	Straw biochar	＞8	9.81	400-600	550	550	No biochar added	Biochar added	0	1%-5%	0.0125	30 t/ha		6.01	0.0866	0.05	6.73	0.22516	0.13
489	2021年		盆栽	7.79	Alkaline	0-20	dairy manure	Other biochar	＞8	9.25	200-400	300	300	No biochar added	Biochar added	0	＜1%	0.005			7.87	0.01732	0.01	8.13	0.06928	0.04
489	2021年		盆栽	7.79	Alkaline	0-20	dairy manure	Other biochar	＞8	9.25	200-400	300	300	No biochar added	Biochar added	0	1%-5%	0.01			7.87	0.01732	0.01	8.21	0.05196	0.03
489	2021年		盆栽	7.79	Alkaline	0-20	dairy manure	Other biochar	＞8	9.25	200-400	300	300	No biochar added	Biochar added	0	1%-5%	0.02			7.87	0.01732	0.01	8.39	0.05196	0.03
489	2021年		盆栽	7.79	Alkaline	0-20	dairy manure	Other biochar	＞8	9.25	200-400	300	300	No biochar added	Biochar added	0	5%-10%	0.05			7.87	0.01732	0.01	8.51	0.06928	0.04
489	2021年		盆栽	7.79	Alkaline	0-20	dairy manure	Other biochar	＞8	9.25	200-400	300	300	No biochar added	Biochar added	0	＜1%	0.005			7.94	0.12124	0.07	8.2	0.10392	0.06
489	2021年		盆栽	7.79	Alkaline	0-20	dairy manure	Other biochar	＞8	9.25	200-400	300	300	No biochar added	Biochar added	0	1%-5%	0.01			7.94	0.12124	0.07	8.23	0.03464	0.02
489	2021年		盆栽	7.79	Alkaline	0-20	dairy manure	Other biochar	＞8	9.25	200-400	300	300	No biochar added	Biochar added	0	1%-5%	0.02			7.94	0.12124	0.07	8.33	0.05196	0.03
489	2021年		盆栽	7.79	Alkaline	0-20	dairy manure	Other biochar	＞8	9.25	200-400	300	300	No biochar added	Biochar added	0	5%-10%	0.05			7.94	0.12124	0.07	8.5	0.06928	0.04
489	2021年		盆栽	7.79	Alkaline	0-20	dairy manure	Other biochar	＞8	9.25	200-400	300	300	No biochar added	Biochar added	0	＜1%	0.005			7.95	0.13856	0.08	8.24	0.06928	0.04
489	2021年		盆栽	7.79	Alkaline	0-20	dairy manure	Other biochar	＞8	9.25	200-400	300	300	No biochar added	Biochar added	0	1%-5%	0.01			7.95	0.13856	0.08	8.27	0.10392	0.06
489	2021年		盆栽	7.79	Alkaline	0-20	dairy manure	Other biochar	＞8	9.25	200-400	300	300	No biochar added	Biochar added	0	1%-5%	0.02			7.95	0.13856	0.08	8.38	0.03464	0.02
489	2021年		盆栽	7.79	Alkaline	0-20	dairy manure	Other biochar	＞8	9.25	200-400	300	300	No biochar added	Biochar added	0	5%-10%	0.05			7.95	0.13856	0.08	8.47	0.01732	0.01
494	2021年	2018年	盆栽	6.91	Neutral		corn straw	Straw biochar	＞8	8.43	400-600	450	450	No biochar added	Biochar added	0	＜1%	0.003			6.84	0.06928	0.04	6.89	0.0866	0.05
494	2021年	2018年	盆栽	6.91	Neutral		corn straw	Straw biochar	＞8	8.43	400-600	450	450	No biochar added	Biochar added	0	＜1%	0.006			6.84	0.06928	0.04	6.98	0.05196	0.03
494	2021年	2018年	盆栽	6.91	Neutral		corn straw	Straw biochar	＞8	8.43	400-600	450	450	No biochar added	Biochar added	0	1%-5%	0.012			6.84	0.06928	0.04	6.97	0.01732	0.01
494	2021年	2018年	盆栽	6.91	Neutral		corn straw	Straw biochar	＞8	8.43	400-600	450	450	No biochar added	Biochar added	0	＜1%	0.003			6.96	0.06928	0.04	7	0.10392	0.06
494	2021年	2018年	盆栽	6.91	Neutral		corn straw	Straw biochar	＞8	8.43	400-600	450	450	No biochar added	Biochar added	0	＜1%	0.006			6.96	0.06928	0.04	7.05	0.03464	0.02
494	2021年	2018年	盆栽	6.91	Neutral		corn straw	Straw biochar	＞8	8.43	400-600	450	450	No biochar added	Biochar added	0	1%-5%	0.012			6.96	0.06928	0.04	7.1	0.06928	0.04
501	2022年	2014-2016年	田间试验	8.01	Alkaline	0-15	wheat straw	Straw biochar	＞8	10.35	400-600	450	450	No biochar added	Biochar added	0	＜1%	0.0083	20 t/ha		8.19	0.12124	0.07	8.3	0.10392	0.06
501	2022年	2014-2016年	田间试验	8.01	Alkaline	0-15	wheat straw	Straw biochar	＞8	10.35	400-600	450	450	No biochar added	Biochar added	0	1%-5%	0.0167	40 t/ha		8.19	0.12124	0.07	8.26	0.01732	0.01
501	2022年	2014-2016年	田间试验	8.01	Alkaline	0-15	wheat straw	Straw biochar	＞8	10.35	400-600	450	450	No biochar added	Biochar added	0	1%-5%	0.025	60 t/ha		8.19	0.12124	0.07	8.33	0.06928	0.04
501	2022年	2014-2016年	田间试验	8.01	Alkaline	0-15	wheat straw	Straw biochar	＞8	10.35	400-600	450	450	No biochar added	Biochar added	0	＜1%	0.0083	20 t/ha		8.1	0.06928	0.04	8.08	0.0866	0.05
501	2022年	2014-2016年	田间试验	8.01	Alkaline	0-15	wheat straw	Straw biochar	＞8	10.35	400-600	450	450	No biochar added	Biochar added	0	1%-5%	0.0167	40 t/ha		8.1	0.06928	0.04	8.1	0.10392	0.06
501	2022年	2014-2016年	田间试验	8.01	Alkaline	0-15	wheat straw	Straw biochar	＞8	10.35	400-600	450	450	No biochar added	Biochar added	0	1%-5%	0.025	60 t/ha		8.1	0.06928	0.04	8.15	0.03464	0.02
501	2022年	2014-2016年	田间试验	8.01	Alkaline	0-15	wheat straw	Straw biochar	＞8	10.35	400-600	450	450	No biochar added	Biochar added	0	＜1%	0.0083	20 t/ha		8.02	0.24248	0.14	8.2	0.29444	0.17
501	2022年	2014-2016年	田间试验	8.01	Alkaline	0-15	wheat straw	Straw biochar	＞8	10.35	400-600	450	450	No biochar added	Biochar added	0	1%-5%	0.0167	40 t/ha		8.02	0.24248	0.14	8.21	0.2598	0.15
501	2022年	2014-2016年	田间试验	8.01	Alkaline	0-15	wheat straw	Straw biochar	＞8	10.35	400-600	450	450	No biochar added	Biochar added	0	1%-5%	0.025	60 t/ha		8.02	0.24248	0.14	8.27	0.12124	0.07
501	2022年	2014-2016年	田间试验	8.01	Alkaline	0-15	wheat straw	Straw biochar	＞8	10.35	400-600	450	450	No biochar added	Biochar added	0	＜1%	0.0083	20 t/ha		8.27	0.06928	0.04	8.24	0.06928	0.04
501	2022年	2014-2016年	田间试验	8.01	Alkaline	0-15	wheat straw	Straw biochar	＞8	10.35	400-600	450	450	No biochar added	Biochar added	0	1%-5%	0.0167	40 t/ha		8.27	0.06928	0.04	8.31	0.29444	0.17
501	2022年	2014-2016年	田间试验	8.01	Alkaline	0-15	wheat straw	Straw biochar	＞8	10.35	400-600	450	450	No biochar added	Biochar added	0	1%-5%	0.025	60 t/ha		8.27	0.06928	0.04	8.35	0.20784	0.12
501	2022年	2014-2016年	田间试验	8.01	Alkaline	0-15	wheat straw	Straw biochar	＞8	10.35	400-600	450	450	No biochar added	Biochar added	0	＜1%	0.0083	20 t/ha		8.37	0.06928	0.04	8.42	0.06928	0.04
501	2022年	2014-2016年	田间试验	8.01	Alkaline	0-15	wheat straw	Straw biochar	＞8	10.35	400-600	450	450	No biochar added	Biochar added	0	1%-5%	0.0167	40 t/ha		8.37	0.06928	0.04	8.49	0.0866	0.05
501	2022年	2014-2016年	田间试验	8.01	Alkaline	0-15	wheat straw	Straw biochar	＞8	10.35	400-600	450	450	No biochar added	Biochar added	0	1%-5%	0.025	60 t/ha		8.37	0.06928	0.04	8.49	0.12124	0.07
508	2021年	2017年	盆栽	6.9	Neutral		rice straw	Straw biochar	＞8	9.2	400-600	500	500	No biochar added	Biochar added	0	＜1%	0.002			6.38	0.638		6.56	0.656
508	2021年	2017年	盆栽	6.9	Neutral		rice straw	Straw biochar	＞8	9.2	400-600	500	500	No biochar added	Biochar added	0	1%-5%	0.01			6.38	0.638		7.12	0.712
508	2021年	2017年	盆栽	6.9	Neutral		rice straw	Straw biochar	＞8	9.2	400-600	500	500	No biochar added	Biochar added	0	5%-10%	0.05			6.38	0.638		7.72	0.772
509	2020年	2013年	盆栽	6	Acid	0-20	rubber wood timber.	Wood biochar	＞8	9.75	400-600	450	400-500	No biochar added	Biochar added	0	1%-5%	0.0125			5.99	0.10392	0.06	6.07	0.05196	0.03
509	2020年	2013年	盆栽	6	Acid	0-20	rubber wood timber.	Wood biochar	＞8	9.75	400-600	450	400-500	No biochar added	Biochar added	0	1%-5%	0.025			5.99	0.10392	0.06	6.22	0.06928	0.04
509	2020年	2013年	盆栽	6	Acid	0-20	rubber wood timber.	Wood biochar	＞8	9.75	400-600	450	400-500	No biochar added	Biochar added	0	5%-10%	0.05			5.99	0.10392	0.06	6.66	0.10392	0.06
509	2020年	2013年	盆栽	6	Acid	0-20	rubber wood timber.	Wood biochar	＞8	9.75	400-600	450	400-500	No biochar added	Biochar added	0	1%-5%	0.0125			5.69	0.13856	0.08	5.94	0.06928	0.04
509	2020年	2013年	盆栽	6	Acid	0-20	rubber wood timber.	Wood biochar	＞8	9.75	400-600	450	400-500	No biochar added	Biochar added	0	1%-5%	0.025			5.69	0.13856	0.08	6.3	0.06928	0.04
509	2020年	2013年	盆栽	6	Acid	0-20	rubber wood timber.	Wood biochar	＞8	9.75	400-600	450	400-500	No biochar added	Biochar added	0	5%-10%	0.05			5.69	0.13856	0.08	6.7	0.05196	0.03
523	2022年	2020年	温室	6.28	Acid	0-20	corn straw	Straw biochar	＞8	9.95	400-600	450	450	No biochar added	Biochar added	0	1%-5%	0.0104	25 t/ha		6.88	0.14		7.58	0.02
559	2022年	2019年	盆栽	4.61	Acid	0-20	rice straw	Straw biochar	＞8	9.94	200-400	350	350	No biochar added	Biochar added	0	1%-5%	0.01			4.55	0	0	4.67	0.01732	0.01
559	2022年	2019年	盆栽	4.61	Acid	0-20	rice straw	Straw biochar	＞8	11.11	400-600	550	550	No biochar added	Biochar added	0	1%-5%	0.01			4.55	0	0	4.92	0.29444	0.17
559	2022年	2019年	盆栽	4.61	Acid	0-20	rapeseed straw	Straw biochar	＞8	10.58	200-400	350	350	No biochar added	Biochar added	0	1%-5%	0.01			4.55	0	0	4.75	0.03464	0.02
559	2022年	2019年	盆栽	4.61	Acid	0-20	rapeseed straw	Straw biochar	＞8	10.76	400-600	550	550	No biochar added	Biochar added	0	1%-5%	0.01			4.55	0	0	4.7	0.06928	0.04
565	2022年	2019年	盆栽	5.7	Acid	60-100	cork wood	Wood biochar	＜8	7.9	400-600	550	550	No biochar added	Biochar added	0	1%-5%	0.02			5.68	0.03464	0.02	5.79	0.06928	0.04
565	2022年	2019年	盆栽	5.7	Acid	60-100	wheat straw	Straw biochar	＞8	9.9	400-600	550	550	No biochar added	Biochar added	0	1%-5%	0.02			5.68	0.03464	0.02	5.79	0.06928	0.04
565	2022年	2019年	盆栽	7.7	Alkaline	0-25	cork wood	Wood biochar	＜8	7.9	400-600	550	550	No biochar added	Biochar added	0	1%-5%	0.02			7.88	0.01732	0.01	8.19	0	0
565	2022年	2019年	盆栽	7.7	Alkaline	0-25	wheat straw	Straw biochar	＞8	9.9	400-600	550	550	No biochar added	Biochar added	0	1%-5%	0.02			7.88	0.01732	0.01	8.3	0	0
565	2022年	2019年	盆栽	5.7	Acid	60-100	cork wood	Wood biochar	＜8	7.9	400-600	550	550	No biochar added	Biochar added	0	1%-5%	0.02			5.71	0.03464	0.02	5.79	0.03464	0.02
565	2022年	2019年	盆栽	5.7	Acid	60-100	wheat straw	Straw biochar	＞8	9.9	400-600	550	550	No biochar added	Biochar added	0	1%-5%	0.02			5.71	0.03464	0.02	5.83	0.01732	0.01
565	2022年	2019年	盆栽	7.7	Alkaline	0-25	cork wood	Wood biochar	＜8	7.9	400-600	550	550	No biochar added	Biochar added	0	1%-5%	0.02			8.08	0.01732	0.01	8.23	0.01732	0.01
565	2022年	2019年	盆栽	7.7	Alkaline	0-25	wheat straw	Straw biochar	＞8	9.9	400-600	550	550	No biochar added	Biochar added	0	1%-5%	0.02			8.08	0.01732	0.01	8.42	0.01732	0.01
577	2022年	2019年	田间试验	5.57	Acid	0-20	bamboo.	Wood biochar	＞8	11.3	400-600	450	450	No biochar added	Biochar added	0	1%-5%	0.03			6.07	0	0	6.43	0	0
577	2022年	2019年	田间试验	5.57	Acid	0-20	bamboo.	Wood biochar	＞8	11.3	400-600	450	450	No biochar added	Biochar added	0	5%-10%	0.06			6.07	0	0	6.49	0.15588	0.09
577	2022年	2019年	田间试验	5.57	Acid	0-20	bamboo.	Wood biochar	＞8	11.3	400-600	450	450	No biochar added	Biochar added	0	1%-5%	0.03			6.27	0.05196	0.03	6.39	0.06928	0.04
577	2022年	2019年	田间试验	5.57	Acid	0-20	bamboo.	Wood biochar	＞8	11.3	400-600	450	450	No biochar added	Biochar added	0	5%-10%	0.06			6.27	0.05196	0.03	6.78	0	0
577	2022年	2019年	田间试验	5.57	Acid	0-20	bamboo.	Wood biochar	＞8	11.3	400-600	450	450	No biochar added	Biochar added	0	1%-5%	0.03			6.78	0.05196	0.03	6.33	0.05196	0.03
577	2022年	2019年	田间试验	5.57	Acid	0-20	bamboo.	Wood biochar	＞8	11.3	400-600	450	450	No biochar added	Biochar added	0	5%-10%	0.06			6.78	0.05196	0.03	7.04	0.06928	0.04
577	2022年	2019年	田间试验	5.57	Acid	20-40	bamboo.	Wood biochar	＞8	11.3	400-600	450	450	No biochar added	Biochar added	0	5%-10%	0.06			5.98	0.15588	0.09	6.01	0.3464	0.2
577	2022年	2019年	田间试验	5.57	Acid	20-40	bamboo.	Wood biochar	＞8	11.3	400-600	450	450	No biochar added	Biochar added	0	1%-5%	0.03			5.69	0.15588	0.09	5.98	0.10392	0.06
577	2022年	2019年	田间试验	5.57	Acid	20-40	bamboo.	Wood biochar	＞8	11.3	400-600	450	450	No biochar added	Biochar added	0	5%-10%	0.06			5.69	0.15588	0.09	5.98	0.05196	0.03
577	2022年	2019年	田间试验	5.57	Acid	0-20	bamboo.	Wood biochar	＞8	11.3	400-600	450	450	No biochar added	Biochar added	0	1%-5%	0.03			6.53	0.05196	0.03	6.82	0.10392	0.06
577	2022年	2019年	田间试验	5.57	Acid	0-20	bamboo.	Wood biochar	＞8	11.3	400-600	450	450	No biochar added	Biochar added	0	5%-10%	0.06			6.53	0.05196	0.03	7.26	0.06928	0.04
577	2022年	2019年	田间试验	5.57	Acid	20-40	bamboo.	Wood biochar	＞8	11.3	400-600	450	450	No biochar added	Biochar added	0	1%-5%	0.03			6.59	0.05196	0.03	6.69	0.05196	0.03
577	2022年	2019年	田间试验	5.57	Acid	20-40	bamboo.	Wood biochar	＞8	11.3	400-600	450	450	No biochar added	Biochar added	0	5%-10%	0.06			6.59	0.05196	0.03	6.66	0.05196	0.03
577	2022年	2019年	田间试验	5.57	Acid	20-40	bamboo.	Wood biochar	＞8	11.3	400-600	450	450	No biochar added	Biochar added	0	1%-5%	0.03			6.3	0.06928	0.04	6.75	0.05196	0.03
577	2022年	2019年	田间试验	5.57	Acid	20-40	bamboo.	Wood biochar	＞8	11.3	400-600	450	450	No biochar added	Biochar added	0	5%-10%	0.06			6.3	0.06928	0.04	6.5	0.05196	0.03

## Sheet: Total
Num.	Soil pH	Control pH	Control SD	Experiment pH	Experiment SD	Sample size of control group	Sample size of experiment group
13	Acid	6.4	0.13416	7.2	0.1118	397	397
13	Acid	6.4	0.13416	7.58	0.1118	397	397
13	Acid	6.4	0.13416	7.8	0.06708	397	397
13	Acid	6.4	0.13416	7.11	0.08944	397	397
13	Acid	6.4	0.13416	7.48	0.15652	397	397
13	Acid	6.4	0.13416	7.69	0.04472	397	397
13	Acid	6.4	0.13416	7.24	0.04472	397	397
13	Acid	6.4	0.13416	7.53	0.1118	397	397
13	Acid	6.4	0.13416	7.8	0.04472	397	397
16	Acid	4.46	0.09	5.1	0.35	397	397
16	Acid	4.46	0.09	5	0.01	397	397
16	Acid	4.41	0.04	4.53	0.39	397	397
16	Acid	4.41	0.04	4.73	0.19	397	397
16	Acid	4.63	0.01	4.69	0.23	397	397
16	Acid	4.63	0.01	4.67	0.17	397	397
16	Acid	4.59	0.2	4.66	0.36	397	397
17	Acid	6.56	0.056	6.71	0.06	397	397
17	Acid	6.56	0.056	6.87	0.05	397	397
22	Acid	5.07	0.507	5.07	0.507	397	397
22	Acid	5.07	0.507	5.29	0.529	397	397
22	Acid	5.07	0.507	5.14	0.514	397	397
22	Acid	4.95	0.495	5.13	0.272	397	397
22	Acid	4.95	0.495	6.81	0.238	397	397
22	Acid	4.95	0.495	7.69	0.265	397	397
24	Acid	5.69	0.08	5.93	0.04	397	397
24	Acid	5.69	0.08	6.38	0.1	397	397
24	Acid	5.75	0.08	5.92	0.11	397	397
24	Acid	5.75	0.08	6.35	0.07	397	397
24	Acid	5.98	0.2	6.31	0.55	397	397
24	Acid	5.98	0.2	6.45	0.15	397	397
24	Acid	5.89	0.2	6.1	0.22	397	397
24	Acid	5.89	0.2	6.4	0.06	397	397
34	Acid	3.77	0.01	3.88	0.03	397	397
34	Acid	5.17	0.03	5.32	0.02	397	397
34	Acid	4.52	0.04	4.83	0.01	397	397
34	Acid	3.85	0.01	3.96	0.01	397	397
34	Acid	3.81	0.02	4.05	0.01	397	397
37	Acid	5.3	0.03	5.42	0.07	397	397
37	Acid	5.3	0.03	5.61	0.11	397	397
48	Acid	4.76	0.07	4.8	0.04	397	397
48	Acid	4.76	0.07	5.05	0.08	397	397
48	Acid	4.81	0.02	4.83	0.06	397	397
48	Acid	4.81	0.02	5.92	0.05	397	397
50	Acid	5.27	0.0866	5.71	0.38104	397	397
50	Acid	5.27	0.0866	6.01	0.32908	397	397
50	Acid	5.27	0.0866	6.12	0.12124	397	397
50	Acid	5.27	0.0866	6.25	0.01732	397	397
50	Acid	6.34	0.41568	6.79	0.12124	397	397
50	Acid	6.34	0.41568	6.97	0.57156	397	397
50	Acid	6.34	0.41568	6.99	0.41568	397	397
50	Acid	6.34	0.41568	7.23	0.2598	397	397
52	Acid	5.54	0.24	6.12	0.04	397	397
52	Acid	5.49	0.2	6.03	0.17	397	397
52	Acid	5.37	0.14	5.72	0.06	397	397
52	Acid	5.42	0.02	5.69	0.27	397	397
52	Acid	5.23	0.09	5.71	0.11	397	397
53	Acid	6.51	0.0866	6.53	0.12124	397	397
53	Acid	6.51	0.0866	6.53	0.13856	397	397
53	Acid	6.51	0.0866	6.59	0.0866	397	397
53	Acid	6.51	0.0866	6.62	0.12124	397	397
54	Acid	5.71	0.571	6.62	0.662	397	397
56	Acid	4.61	0.1732	4.65	0.22516	397	397
56	Acid	4.61	0.1732	4.82	0.12124	397	397
56	Acid	4.61	0.1732	4.86	0.1732	397	397
56	Acid	4.61	0.1732	5.22	0.24248	397	397
60	Acid	5.46	0.546	6.69	0.669	397	397
60	Acid	5.17	0.517	6.64	0.664	397	397
60	Acid	4.97	0.497	6.27	0.627	397	397
76	Acid	4.63	0.463	5.32	0.532	397	397
76	Acid	5.04	0.504	5.9	0.59	397	397
76	Acid	5.32	0.532	6	0.6	397	397
76	Acid	4.84	0.484	5.45	0.545	397	397
76	Acid	5.13	0.513	5.91	0.591	397	397
76	Acid	6.08	0.608	6.08	0.608	397	397
79	Acid	5.4	0.3	6	0.2	397	397
79	Acid	5.4	0.2	6.6	0.1	397	397
79	Acid	5.3	0.2	6.2	0.4	397	397
79	Acid	5.2	0	5.7	0.5	397	397
79	Acid	5.2	0.2	6	0.4	397	397
79	Acid	5.5	0.6	5.8	0.3	397	397
86	Acid	3.9	0.02	4	0.05	397	397
87	Acid	4.61	0.11	4.89	0.01	397	397
87	Acid	4.61	0.11	4.96	0.01	397	397
87	Acid	4.61	0.11	4.94	0.02	397	397
87	Acid	4.61	0.11	4.98	0.03	397	397
87	Acid	4.61	0.11	4.89	0.04	397	397
87	Acid	4.61	0.11	5.02	0.02	397	397
87	Acid	4.61	0.11	4.96	0.02	397	397
87	Acid	4.61	0.11	5.2	0	397	397
87	Acid	4.61	0.11	4.72	0.05	397	397
87	Acid	5.07	0.15	5.12	0.1	397	397
87	Acid	5.07	0.15	5.25	0.13	397	397
87	Acid	5.07	0.15	5.37	0.13	397	397
87	Acid	5.07	0.15	5.25	0.01	397	397
87	Acid	5.07	0.15	5.44	0.07	397	397
87	Acid	5.07	0.15	5.07	0.1	397	397
87	Acid	5.07	0.15	5.15	0.08	397	397
87	Acid	5.07	0.15	5.35	0.21	397	397
87	Acid	5.07	0.15	5.27	0.18	397	397
87	Acid	5.07	0.15	5.11	0.03	397	397
96	Acid	4.3	0.02	4.74	0.06	397	397
96	Acid	4.3	0.02	5.2	0.01	397	397
96	Acid	4.3	0.02	5.11	0.04	397	397
96	Acid	4.3	0.02	5.3	0.11	397	397
105	Acid	4.48	0.04	6.03	0.04	397	397
105	Acid	4.56	0.04	6.17	0.02	397	397
112	Acid	4.4	0.1732	4.6	0.19052	397	397
112	Acid	4.4	0.1732	4.84	0.19052	397	397
112	Acid	4.4	0.19052	4.69	0.1732	397	397
112	Acid	4.4	0.19052	5.14	0.20784	397	397
112	Acid	4.2	0.1732	4.39	0.19052	397	397
112	Acid	4.2	0.1732	4.87	0.20784	397	397
112	Acid	4.14	0.15588	4.32	0.1732	397	397
112	Acid	4.14	0.15588	4.64	0.19052	397	397
115	Acid	5.67	0.22516	6.32	0.15588	397	397
115	Acid	6.02	0.06928	6.24	0.13856	397	397
115	Acid	6.32	0.12124	6.5	0	397	397
115	Acid	5.75	0.0866	6.06	0.0866	397	397
115	Acid	5.89	0.13856	6.11	0.13856	397	397
115	Acid	5.67	0.22516	6.24	0.22516	397	397
115	Acid	6.02	0.06928	6.5	0.06928	397	397
115	Acid	6.32	0.12124	6.5	0.06928	397	397
115	Acid	5.75	0.0866	6.06	0.0866	397	397
115	Acid	5.89	0.13856	6.32	0.31176	397	397
125	Acid	5.2	0	5.5	0	397	397
125	Acid	5.2	0	5.9	0	397	397
128	Acid	5.71	0.05196	5.96	0.03464	397	397
128	Acid	5.71	0.05196	6.17	0.0866	397	397
128	Acid	5.71	0.05196	6.33	0.03464	397	397
134	Acid	3.95	0.01732	4.3	0.01732	397	397
134	Acid	3.95	0.01732	4.6	0	397	397
134	Acid	3.95	0.01732	5.17	0.03464	397	397
134	Acid	3.95	0.01732	4.35	0	397	397
134	Acid	3.95	0.01732	4.48	0.01732	397	397
134	Acid	3.95	0.01732	4.8	0.01732	397	397
134	Acid	3.95	0.01732	4.36	0	397	397
134	Acid	3.95	0.01732	4.82	0.05196	397	397
134	Acid	3.95	0.01732	5.2	0.01732	397	397
134	Acid	3.95	0.01732	4.4	0	397	397
134	Acid	3.95	0.01732	4.86	0.01732	397	397
134	Acid	3.95	0.01732	5.22	0.01732	397	397
136	Acid	4.08	0.408	4.35	0.435	397	397
136	Acid	4.08	0.408	4.55	0.435	397	397
140	Acid	5.7	0.01	5.78	0.02	397	397
140	Acid	5.7	0.01	6	0.05	397	397
140	Acid	5.7	0.01	6.15	0.05	397	397
148	Acid	6.64	0.02	6.67	0.03	397	397
148	Acid	6.64	0.02	6.82	0.02	397	397
148	Acid	6.64	0.02	6.94	0.02	397	397
148	Acid	6.64	0.02	7.09	0.01	397	397
155	Acid	5.01	0.501	5.23	0.523	397	397
155	Acid	5.09	0.509	5.11	0.511	397	397
155	Acid	5.04	0.504	5.16	0.516	397	397
161	Acid	5.26	0.12124	5.43	0.19052	397	397
161	Acid	5.26	0.12124	5.76	0.29444	397	397
161	Acid	5.74	0.24248	5.97	0.06928	397	397
161	Acid	5.74	0.24248	6.4	0.13856	397	397
208	Acid	4.31	0.01732	4.39	0.03464	397	397
208	Acid	4.31	0.01732	4.54	0.01732	397	397
208	Acid	4.31	0.01732	4.67	0.10392	397	397
208	Acid	4.29	0.03464	4.73	0.10392	397	397
208	Acid	4.29	0.03464	4.4	0.1732	397	397
208	Acid	4.29	0.03464	4.51	0.05196	397	397
209	Acid	3.47	0.347	4.75	0.475	397	397
209	Acid	3.47	0.347	3.74	0.374	397	397
209	Acid	3.47	0.347	4	0.4	397	397
209	Acid	3.47	0.347	4.41	0.441	397	397
209	Acid	3.47	0.347	3.71	0.371	397	397
209	Acid	3.69	0.369	4.71	0.471	397	397
211	Acid	4.74	0.11	5.88	0.15	397	397
211	Acid	4.74	0.11	6.56	0.25	397	397
211	Acid	4.74	0.11	4.82	0.19	397	397
211	Acid	4.74	0.11	4.97	0.05	397	397
219	Acid	6.42	0.05	6.68	0.12	397	397
226	Acid	5.63	0.563	5.84	0.584	397	397
226	Acid	5.63	0.563	5.93	0.593	397	397
226	Acid	5.38	0.538	5.49	0.549	397	397
226	Acid	5.38	0.538	5.79	0.579	397	397
229	Acid	5.95	0.1	6.88	0.1	397	397
231	Acid	6.01	0.033	6.16	0.066	397	397
231	Acid	6.01	0.033	6.19	0.063	397	397
231	Acid	5.06	0.038	5.13	0.068	397	397
231	Acid	5.06	0.038	5.16	0.097	397	397
233	Acid	5.83	0.583	6.36	0.636	397	397
233	Acid	5.83	0.583	6.65	0.665	397	397
235	Acid	4.5	0.16	4.92	0.16	397	397
263	Acid	4.8	0.13856	4.97	0.10392	397	397
263	Acid	4.8	0.13856	4.97	0.24248	397	397
263	Acid	4.8	0.13856	5.12	0.31176	397	397
263	Acid	4.8	0.13856	5.04	0.19052	397	397
263	Acid	4.8	0.13856	5.21	0.29444	397	397
263	Acid	4.8	0.13856	5.23	0.10392	397	397
263	Acid	4.81	0.06928	4.81	0.20784	397	397
263	Acid	4.81	0.06928	4.87	0.19052	397	397
263	Acid	4.81	0.06928	4.91	0.12124	397	397
263	Acid	4.81	0.06928	4.87	0.15588	397	397
263	Acid	4.81	0.06928	5.13	0.24248	397	397
265	Acid	4.79	0.09	4.84	0.07	397	397
265	Acid	4.79	0.09	4.88	0.07	397	397
265	Acid	4.79	0.09	5.02	0.08	397	397
265	Acid	4.79	0.09	5.19	0.07	397	397
265	Acid	4.79	0.09	5.21	0.05	397	397
265	Acid	4.79	0.09	5.32	0.04	397	397
265	Acid	4.65	0.08	4.76	0.05	397	397
265	Acid	4.65	0.08	4.88	0.08	397	397
265	Acid	4.65	0.08	4.8	0.08	397	397
265	Acid	4.65	0.08	4.91	0.06	397	397
265	Acid	4.65	0.08	5.04	0.06	397	397
265	Acid	4.65	0.08	5.04	0.08	397	397
265	Acid	4.63	0.05	4.75	0.08	397	397
265	Acid	4.63	0.05	4.73	0.07	397	397
265	Acid	4.63	0.05	4.8	0.07	397	397
265	Acid	4.63	0.05	4.88	0.05	397	397
265	Acid	4.63	0.05	4.81	0.07	397	397
265	Acid	4.63	0.05	5.02	0.04	397	397
265	Acid	4.57	0.07	4.6	0.06	397	397
265	Acid	4.57	0.07	4.76	0.07	397	397
265	Acid	4.57	0.07	4.73	0.07	397	397
265	Acid	4.57	0.07	4.79	0.04	397	397
265	Acid	4.57	0.07	4.8	0.07	397	397
265	Acid	4.57	0.07	4.75	0.05	397	397
265	Acid	4.34	0.04	4.36	0.07	397	397
265	Acid	4.34	0.04	4.36	0.05	397	397
265	Acid	4.34	0.04	4.58	0.06	397	397
265	Acid	4.34	0.04	4.52	0.04	397	397
265	Acid	4.34	0.04	4.65	0.04	397	397
265	Acid	4.34	0.04	4.66	0.05	397	397
276	Acid	5.75	0.02	5.82	0.03	397	397
276	Acid	5.75	0.02	5.89	0.02	397	397
283	Acid	6.07	0.12	6.07	0.12	397	397
283	Acid	6.07	0.12	6.19	0.08	397	397
283	Acid	5.66	0.04	6.09	0.08	397	397
283	Acid	5.66	0.04	6.21	0.12	397	397
293	Acid	5.9	0.3464	6.5	0.0866	397	397
322	Acid	5.56	0.0866	6.33	0.10392	397	397
322	Acid	5.56	0.0866	6.67	0.0866	397	397
322	Acid	3.83	0.19052	4.17	0.0866	397	397
322	Acid	3.83	0.19052	4.56	0.0866	397	397
324	Acid	5.36	0.05	5.59	0.02	397	397
324	Acid	5.36	0.05	5.63	0.05	397	397
324	Acid	5.36	0.05	5.69	0.06	397	397
324	Acid	5.36	0.05	5.74	0.03	397	397
326	Acid	5.93	0.6062	6.11	0.15588	397	397
326	Acid	5.93	0.6062	6.46	0.03464	397	397
332	Acid	4.88	0.05	4.99	0.13	397	397
332	Acid	4.88	0.05	5.12	0.01	397	397
332	Acid	6.01	0.06	6.15	0.02	397	397
332	Acid	6.01	0.06	6.29	0.15	397	397
332	Acid	5.54	0.23	5.89	0.05	397	397
332	Acid	5.54	0.23	6.26	0.17	397	397
333	Acid	6.09	0.06	6.14	0.07	397	397
333	Acid	6.09	0.06	6.65	0.05	397	397
342	Acid	5.51	0.05196	6.23	0.15588	397	397
342	Acid	5.42	0.06928	6.5	0.05196	397	397
342	Acid	5.32	0.29444	6.26	0.0866	397	397
353	Acid	5.11	0.06928	5.15	0	397	397
353	Acid	5.11	0.06928	5.31	0	397	397
353	Acid	5.06	0.506	5.15	0.515	397	397
353	Acid	5.06	0.506	5.1	0.51	397	397
366	Acid	5.9	0.28	7.58	0.39	397	397
392	Acid	4.77	0.477	4.81	0.481	397	397
392	Acid	4.77	0.477	5.05	0.505	397	397
392	Acid	4.6	0.46	4.77	0.477	397	397
392	Acid	4.6	0.46	6.18	0.618	397	397
392	Acid	4.39	0.439	4.53	0.453	397	397
392	Acid	4.39	0.439	6.45	0.645	397	397
392	Acid	4.7	0.47	5.05	0.505	397	397
392	Acid	4.7	0.47	7.28	0.728	397	397
392	Acid	4.12	0.412	4.6	0.46	397	397
392	Acid	4.12	0.412	7.18	0.718	397	397
392	Acid	4.81	0.481	4.84	0.484	397	397
392	Acid	4.81	0.481	5.94	0.594	397	397
392	Acid	5.08	0.508	5.22	0.522	397	397
392	Acid	5.08	0.508	6.76	0.676	397	397
392	Acid	4.91	0.491	6.56	0.656	397	397
392	Acid	4.81	0.481	5.12	0.512	397	397
392	Acid	4.81	0.481	7.31	0.731	397	397
392	Acid	3.78	0.378	4.53	0.453	397	397
392	Acid	3.78	0.378	7.07	0.707	397	397
393	Acid	4.09	0.1732	4.43	0.19052	397	397
396	Acid	5.21	0.14	6.82	0.18	397	397
396	Acid	5.21	0.14	6.78	0.16	397	397
396	Acid	5.21	0.14	6.41	0.15	397	397
413	Acid	6.19	0.01	6.25	0.07	397	397
413	Acid	6.19	0.01	6.3	0.06	397	397
413	Acid	6.19	0.01	6.47	0.03	397	397
413	Acid	6.19	0.01	6.8	0.05	397	397
413	Acid	6.19	0.02	6.48	0.02	397	397
413	Acid	6.19	0.02	6.69	0.09	397	397
413	Acid	6.19	0.02	6.98	0.01	397	397
413	Acid	6.19	0.02	7.8	0.04	397	397
413	Acid	6.31	0.06	6.31	0.06	397	397
413	Acid	6.31	0.06	6.32	0.06	397	397
413	Acid	6.31	0.06	6.38	0.02	397	397
413	Acid	6.31	0.06	6.55	0.06	397	397
413	Acid	6.19	0.11	6.36	0.03	397	397
413	Acid	6.19	0.11	6.48	0.06	397	397
413	Acid	6.19	0.11	6.8	0.04	397	397
413	Acid	6.19	0.11	7.51	0.08	397	397
413	Acid	6.22	0.07	6.35	0.04	397	397
413	Acid	6.22	0.07	6.41	0.04	397	397
413	Acid	6.22	0.07	6.51	0.05	397	397
413	Acid	6.22	0.07	6.84	0.12	397	397
413	Acid	6.32	0.04	6.53	0.05	397	397
413	Acid	6.32	0.04	6.75	0.06	397	397
413	Acid	6.32	0.04	7.02	0.04	397	397
413	Acid	6.32	0.04	7.83	0.02	397	397
413	Acid	6.32	0.06	6.35	0.04	397	397
413	Acid	6.32	0.06	6.41	0.08	397	397
413	Acid	6.32	0.06	6.45	0.07	397	397
413	Acid	6.32	0.06	6.59	0.01	397	397
413	Acid	6.39	0.07	6.52	0.04	397	397
413	Acid	6.39	0.07	6.82	0.08	397	397
413	Acid	6.39	0.07	7.54	0.09	397	397
413	Acid	6.24	0.08	6.28	0.11	397	397
413	Acid	6.24	0.08	6.38	0.08	397	397
413	Acid	6.24	0.08	6.51	0.08	397	397
413	Acid	6.24	0.08	6.87	0.15	397	397
413	Acid	6.35	0.05	6.54	0.05	397	397
413	Acid	6.35	0.05	6.75	0.04	397	397
413	Acid	6.35	0.05	7.01	0.01	397	397
413	Acid	6.35	0.05	7.89	0.04	397	397
413	Acid	6.31	0.08	6.33	0.05	397	397
413	Acid	6.31	0.08	6.38	0.01	397	397
413	Acid	6.31	0.08	6.58	0.03	397	397
413	Acid	6.27	0.05	6.35	0.06	397	397
413	Acid	6.27	0.05	6.44	0.06	397	397
413	Acid	6.27	0.05	6.81	0.07	397	397
413	Acid	6.27	0.05	7.59	0.09	397	397
425	Acid	4.45	0.03464	4.56	0.10392	397	397
425	Acid	4.45	0.03464	4.65	0.0866	397	397
425	Acid	4.45	0.03464	4.78	0.10392	397	397
438	Acid	4.94	0.19052	5.36	0.03464	397	397
438	Acid	4.94	0.19052	5.52	0.15588	397	397
438	Acid	4.96	0.10392	5.26	0.10392	397	397
438	Acid	4.96	0.10392	5.29	0.10392	397	397
448	Acid	5.41	0.05196	5.49	0.03464	397	397
448	Acid	5.41	0.05196	5.7	0.10392	397	397
448	Acid	5.41	0.05196	6.32	0.03464	397	397
468	Acid	5.49	0.02	5.54	0.06	397	397
468	Acid	5.49	0.02	5.84	0.18	397	397
468	Acid	5.67	0.06	5.75	0.04	397	397
468	Acid	5.67	0.06	5.9	0.18	397	397
468	Acid	6.3	0.1	6.55	0.12	397	397
473	Acid	7.05	0.05	7.08	0.07	397	397
473	Acid	7.05	0.05	7.15	0.03	397	397
473	Acid	7.06	0.02	7.06	0.01	397	397
473	Acid	7.06	0.02	7.13	0.03	397	397
473	Acid	5.77	0.01	5.83	0.06	397	397
473	Acid	5.77	0.01	5.86	0.01	397	397
473	Acid	5.68	0.02	5.76	0.04	397	397
473	Acid	5.68	0.02	5.85	0.01	397	397
474	Acid	6.12	0.612	6.43	0.643	397	397
474	Acid	6.12	0.612	6.38	0.638	397	397
474	Acid	6.12	0.612	6.35	0.635	397	397
474	Acid	6.11	0.611	6.62	0.662	397	397
474	Acid	6.11	0.611	6.55	0.655	397	397
474	Acid	6.11	0.611	6.6	0.66	397	397
474	Acid	6.17	0.617	6.56	0.656	397	397
474	Acid	6.17	0.617	6.6	0.66	397	397
474	Acid	6.17	0.617	6.61	0.661	397	397
482	Acid	6.03	0.06928	6.2	0.10392	397	397
482	Acid	6.03	0.06928	6.35	0.10392	397	397
482	Acid	6.03	0.06928	7.02	0.13856	397	397
482	Acid	6.01	0.0866	6.19	0.03464	397	397
482	Acid	6.01	0.0866	6.34	0.05196	397	397
482	Acid	6.01	0.0866	6.73	0.22516	397	397
509	Acid	5.99	0.10392	6.07	0.05196	397	397
509	Acid	5.99	0.10392	6.22	0.06928	397	397
509	Acid	5.99	0.10392	6.66	0.10392	397	397
509	Acid	5.69	0.13856	5.94	0.06928	397	397
509	Acid	5.69	0.13856	6.3	0.06928	397	397
509	Acid	5.69	0.13856	6.7	0.05196	397	397
523	Acid	6.88	0.14	7.58	0.02	397	397
559	Acid	4.55	0	4.67	0.01732	397	397
559	Acid	4.55	0	4.92	0.29444	397	397
559	Acid	4.55	0	4.75	0.03464	397	397
559	Acid	4.55	0	4.7	0.06928	397	397
565	Acid	5.68	0.03464	5.79	0.06928	397	397
565	Acid	5.68	0.03464	5.79	0.06928	397	397
565	Acid	5.71	0.03464	5.79	0.03464	397	397
565	Acid	5.71	0.03464	5.83	0.01732	397	397
577	Acid	6.07	0	6.43	0	397	397
577	Acid	6.07	0	6.49	0.15588	397	397
577	Acid	6.27	0.05196	6.39	0.06928	397	397
577	Acid	6.27	0.05196	6.78	0	397	397
577	Acid	6.78	0.05196	6.33	0.05196	397	397
577	Acid	6.78	0.05196	7.04	0.06928	397	397
577	Acid	5.98	0.15588	6.01	0.3464	397	397
577	Acid	5.69	0.15588	5.98	0.10392	397	397
577	Acid	5.69	0.15588	5.98	0.05196	397	397
577	Acid	6.53	0.05196	6.82	0.10392	397	397
577	Acid	6.53	0.05196	7.26	0.06928	397	397
577	Acid	6.59	0.05196	6.69	0.05196	397	397
577	Acid	6.59	0.05196	6.66	0.05196	397	397
577	Acid	6.3	0.06928	6.75	0.05196	397	397
577	Acid	6.3	0.06928	6.5	0.05196	397	397
68	Neutral	6.53	0.11	6.75	0.08	45	45
68	Neutral	6.53	0.11	6.77	0.18	45	45
68	Neutral	6.53	0.11	6.77	0.12	45	45
68	Neutral	6.53	0.04	6.73	0.21	45	45
68	Neutral	6.53	0.04	6.77	0.05	45	45
68	Neutral	6.53	0.04	6.89	0.11	45	45
111	Neutral	6.67	0.03	6.74	0.03	45	45
111	Neutral	6.64	0.01	6.71	0.05	45	45
111	Neutral	6.62	0.03	6.69	0.02	45	45
111	Neutral	6.71	0.04	6.76	0.02	45	45
111	Neutral	6.72	0.01	6.75	0.04	45	45
111	Neutral	6.72	0.02	6.75	0.01	45	45
232	Neutral	7.17	0.717	7.35	0.735	45	45
232	Neutral	7.17	0.717	7.4	0.74	45	45
232	Neutral	7.17	0.717	7.43	0.743	45	45
232	Neutral	7.17	0.717	7.34	0.734	45	45
232	Neutral	7.17	0.717	7.55	0.755	45	45
232	Neutral	7.17	0.717	7.65	0.765	45	45
232	Neutral	7.17	0.717	7.63	0.763	45	45
232	Neutral	7.17	0.717	7.7	0.77	45	45
232	Neutral	7.17	0.717	7.79	0.779	45	45
301	Neutral	6.69	0.13856	7.08	0.06928	45	45
301	Neutral	6.69	0.13856	7.14	0.06928	45	45
301	Neutral	6.69	0.13856	7.17	0.10392	45	45
370	Neutral	7.31	0.35	7.61	0.32	45	45
370	Neutral	7.31	0.35	7.81	0.15	45	45
370	Neutral	7.31	0.35	8.06	0.1	45	45
370	Neutral	7.31	0.35	8.18	0.15	45	45
370	Neutral	7.24	0.1	7.46	0.03	45	45
370	Neutral	7.24	0.1	7.51	0.23	45	45
370	Neutral	7.24	0.1	7.49	0.05	45	45
370	Neutral	7.24	0.1	8.03	0.1	45	45
445	Neutral	6.38	0.638	6.56	0.656	45	45
445	Neutral	6.38	0.638	7.12	0.712	45	45
445	Neutral	6.38	0.638	7.72	0.772	45	45
476	Neutral	6.52	0.13856	6.85	0.32908	45	45
494	Neutral	6.84	0.06928	6.89	0.0866	45	45
494	Neutral	6.84	0.06928	6.98	0.05196	45	45
494	Neutral	6.84	0.06928	6.97	0.01732	45	45
494	Neutral	6.96	0.06928	7	0.10392	45	45
494	Neutral	6.96	0.06928	7.05	0.03464	45	45
494	Neutral	6.96	0.06928	7.1	0.06928	45	45
508	Neutral	6.38	0.638	6.56	0.656	45	45
508	Neutral	6.38	0.638	7.12	0.712	45	45
508	Neutral	6.38	0.638	7.72	0.772	45	45
32	Alkaline	7.87	0.11	7.91	0.07	239	159
32	Alkaline	7.87	0.11	7.79	0.18	239	159
32	Alkaline	8.01	0.08	8.15	0.18	239	159
32	Alkaline	8.01	0.08	7.99	0.08	239	159
36	Alkaline	7.72	0.03464	7.73	0.03464	239	159
36	Alkaline	7.72	0.03464	7.76	0.05196	239	159
36	Alkaline	7.72	0.03464	7.79	0.05196	239	159
36	Alkaline	7.72	0.03464	7.83	0.05196	239	159
40	Alkaline	8.47	0.04	8.33	0.08	239	159
40	Alkaline	8.47	0.04	8.29	0.06	239	159
40	Alkaline	8.47	0.04	8.27	0.05	239	159
40	Alkaline	8.47	0.04	8.15	0.04	239	159
40	Alkaline	8.47	0.04	8.26	0.08	239	159
40	Alkaline	8.47	0.04	8.28	0.06	239	159
40	Alkaline	8.47	0.04	8.35	0.04	239	159
40	Alkaline	8.47	0.04	8.29	0.04	239	159
40	Alkaline	8.47	0.04	8.28	0.04	239	159
40	Alkaline	8.47	0.04	8.07	0.07	239	159
40	Alkaline	8.47	0.04	8.18	0.04	239	159
40	Alkaline	8.47	0.04	8.24	0.02	239	159
40	Alkaline	8.35	0.1	8.11	0.06	239	159
40	Alkaline	8.35	0.1	8.03	0.06	239	159
40	Alkaline	8.35	0.1	7.87	0.1	239	159
40	Alkaline	8.35	0.1	7.71	0.06	239	159
40	Alkaline	8.35	0.1	7.77	0.12	239	159
40	Alkaline	8.35	0.1	7.81	0.09	239	159
40	Alkaline	8.29	0.06	8.17	0.06	239	159
40	Alkaline	8.29	0.06	8.13	0.1	239	159
40	Alkaline	8.29	0.06	8.13	0.02	239	159
40	Alkaline	8.29	0.06	7.93	0.06	239	159
40	Alkaline	8.29	0.06	7.96	0.02	239	159
40	Alkaline	8.29	0.06	8.12	0.06	239	159
48	Alkaline	8.43	0.03	8.39	0.03	239	159
48	Alkaline	8.43	0.03	8.43	0.01	239	159
48	Alkaline	8.2	0.02	8.23	0.05	239	159
48	Alkaline	8.2	0.02	8.16	0.03	239	159
61	Alkaline	8.06	0.05	8.15	0.05	239	159
61	Alkaline	8.06	0.05	8.17	0.07	239	159
61	Alkaline	8.06	0.05	8.18	0.03	239	159
66	Alkaline	8.01	0.01	8.07	0.04	239	159
66	Alkaline	8.01	0.01	8.09	0.05	239	159
91	Alkaline	8.28	0.05196	7.93	0.41568	239	159
91	Alkaline	8.28	0.05196	8.14	0.05196	239	159
91	Alkaline	8.28	0.05196	8.15	0.03464	239	159
128	Alkaline	8	0.03464	8.07	0.03464	239	159
128	Alkaline	8	0.03464	8.11	0.06928	239	159
128	Alkaline	8	0.03464	8.13	0.03464	239	159
146	Alkaline	8.08	0.808	7.88	0.788	239	159
146	Alkaline	8.08	0.808	7.86	0.786	239	159
146	Alkaline	8.08	0.808	7.85	0.785	239	159
146	Alkaline	8.08	0.808	8.05	0.805	239	159
146	Alkaline	8.08	0.808	7.99	0.799	239	159
162	Alkaline	8.44	0.844	8.65	0.865	239	159
162	Alkaline	8.44	0.844	8.68	0.868	239	159
162	Alkaline	8.44	0.844	8.7	0.87	239	159
162	Alkaline	8.41	0.841	8.54	0.854	239	159
162	Alkaline	8.41	0.841	8.56	0.856	239	159
162	Alkaline	8.41	0.841	8.56	0.856	239	159
162	Alkaline	8.31	0.831	8.4	0.84	239	159
162	Alkaline	8.31	0.831	8.43	0.843	239	159
162	Alkaline	8.31	0.831	8.45	0.845	239	159
162	Alkaline	8.46	0.846	8.69	0.869	239	159
162	Alkaline	8.46	0.846	8.71	0.871	239	159
162	Alkaline	8.46	0.846	8.73	0.873	239	159
162	Alkaline	8.42	0.842	8.55	0.855	239	159
162	Alkaline	8.42	0.842	8.56	0.856	239	159
162	Alkaline	8.42	0.842	8.58	0.858	239	159
162	Alkaline	8.33	0.833	8.42	0.842	239	159
162	Alkaline	8.33	0.833	8.44	0.844	239	159
162	Alkaline	8.33	0.833	8.46	0.846	239	159
175	Alkaline	8.25	0.06	8.18	0.03	239	159
175	Alkaline	8.25	0.06	8.11	0.04	239	159
175	Alkaline	8.25	0.06	7.99	0.01	239	159
240	Alkaline	7.08	0.2598	7.23	0.3464	239	159
240	Alkaline	7.08	0.2598	7.22	0.2598	239	159
240	Alkaline	7.08	0.2598	7.41	0.48496	239	159
240	Alkaline	7.66	0.2598	7.7	0.2598	239	159
240	Alkaline	7.66	0.2598	7.81	0.39836	239	159
240	Alkaline	7.66	0.2598	7.94	0.79672	239	159
241	Alkaline	8.63	0.06928	8.89	0.03464	239	159
302	Alkaline	8.08	0.02	8.26	0.03	239	159
302	Alkaline	7.22	0.03	7.62	0.03	239	159
303	Alkaline	8.03	0.803	8.36	0.836	239	159
303	Alkaline	8.3	0.83	8.24	0.824	239	159
303	Alkaline	8.23	0.823	8.39	0.839	239	159
303	Alkaline	8.3	0.83	8.24	0.824	239	159
319	Alkaline	8.18	0.12124	8.4	0.20784	239	159
342	Alkaline	8.73	0.03464	8.78	0.15588	239	159
342	Alkaline	8.75	0.36372	8.68	0.10392	239	159
342	Alkaline	8.36	0.2598	8.52	0.3464	239	159
394	Alkaline	7.99	0.05196	7.62	0.10392	239	159
394	Alkaline	8.02	0.06928	7.95	0.06928	239	159
400	Alkaline	8.46	0.01	8.47	0.04	239	159
400	Alkaline	8.42	0.01	8.41	0.03	239	159
400	Alkaline	8.39	0.02	8.37	0.02	239	159
400	Alkaline	8.37	0	8.38	0.04	239	159
402	Alkaline	8.16	0.01	8.16	0.06	239	159
402	Alkaline	8.16	0.01	8.19	0.06	239	159
402	Alkaline	8.16	0.01	8.15	0	239	159
402	Alkaline	8.39	0.02	8.43	0.08	239	159
402	Alkaline	8.39	0.02	8.44	0.03	239	159
402	Alkaline	8.39	0.02	8.37	0.02	239	159
419	Alkaline	8.2	0.82	8	0.8	239	159
419	Alkaline	8	0.8	7.8	0.78	239	159
441	Alkaline	8.4	0.01732	8.32	0.01732	239	159
441	Alkaline	8.38	0.01732	8.32	0.01732	239	159
442	Alkaline	8.25	0.06	8.23	0.04	239	159
442	Alkaline	8.25	0.06	8.18	0.04	239	159
442	Alkaline	8.25	0.06	8.01	0.06	239	159
456	Alkaline	8.85	0.885	8.76	0.876	239	159
456	Alkaline	8.85	0.885	8.81	0.881	239	159
456	Alkaline	8.85	0.885	8.91	0.891	239	159
462	Alkaline	8.21	0.02	8.32	0.02	239	159
462	Alkaline	8.21	0.02	8.35	0.04	239	159
462	Alkaline	8.21	0.02	8.35	0.02	239	159
462	Alkaline	8.21	0.02	8.37	0.04	239	159
462	Alkaline	8.22	0.03	8.18	8.2	239	159
462	Alkaline	8.22	0.03	8.23	0.04	239	159
462	Alkaline	8.22	0.03	8.21	8.25	239	159
462	Alkaline	8.22	0.03	8.19	8.21	239	159
462	Alkaline	8.04	0.03	8.1	0.07	239	159
462	Alkaline	8.04	0.03	8.08	0.07	239	159
462	Alkaline	8.04	0.03	8.05	0.01	239	159
462	Alkaline	8.04	0.03	8.05	0.07	239	159
463	Alkaline	7.66	0.20784	7.7	0.13856	239	159
463	Alkaline	7.66	0.20784	7.81	0.20784	239	159
463	Alkaline	7.66	0.20784	7.93	0.793	239	159
476	Alkaline	8.89	0.2598	9.05	0.45032	239	159
489	Alkaline	7.87	0.01732	8.13	0.06928	239	159
489	Alkaline	7.87	0.01732	8.21	0.05196	239	159
489	Alkaline	7.87	0.01732	8.39	0.05196	239	159
489	Alkaline	7.87	0.01732	8.51	0.06928	239	159
489	Alkaline	7.94	0.12124	8.2	0.10392	239	159
489	Alkaline	7.94	0.12124	8.23	0.03464	239	159
489	Alkaline	7.94	0.12124	8.33	0.05196	239	159
489	Alkaline	7.94	0.12124	8.5	0.06928	239	159
489	Alkaline	7.95	0.13856	8.24	0.06928	239	159
489	Alkaline	7.95	0.13856	8.27	0.10392	239	159
489	Alkaline	7.95	0.13856	8.38	0.03464	239	159
489	Alkaline	7.95	0.13856	8.47	0.01732	239	159
501	Alkaline	8.19	0.12124	8.3	0.10392	239	159
501	Alkaline	8.19	0.12124	8.26	0.01732	239	159
501	Alkaline	8.19	0.12124	8.33	0.06928	239	159
501	Alkaline	8.1	0.06928	8.08	0.0866	239	159
501	Alkaline	8.1	0.06928	8.1	0.10392	239	159
501	Alkaline	8.1	0.06928	8.15	0.03464	239	159
501	Alkaline	8.02	0.24248	8.2	0.29444	239	159
501	Alkaline	8.02	0.24248	8.21	0.2598	239	159
501	Alkaline	8.02	0.24248	8.27	0.12124	239	159
501	Alkaline	8.27	0.06928	8.24	0.06928	239	159
501	Alkaline	8.27	0.06928	8.31	0.29444	239	159
501	Alkaline	8.27	0.06928	8.35	0.20784	239	159
501	Alkaline	8.37	0.06928	8.42	0.06928	239	159
501	Alkaline	8.37	0.06928	8.49	0.0866	239	159
501	Alkaline	8.37	0.06928	8.49	0.12124	239	159
565	Alkaline	7.88	0.01732	8.19	0	239	159
565	Alkaline	7.88	0.01732	8.3	0	239	159
565	Alkaline	8.08	0.01732	8.23	0.01732	239	159
565	Alkaline	8.08	0.01732	8.42	0.01732	239	159

## Sheet: Types of biochar
Num.	Soil pH	Types of biochar	Control pH	Control SD	Experiment pH	Experiment SD	Sample size of control group	Sample size of experiment group
16	Acid	Straw biochar	4.46	0.09	5.1	0.35	345	345
16	Acid	Straw biochar	4.46	0.09	5	0.01	345	345
16	Acid	Straw biochar	4.41	0.04	4.53	0.39	345	345
16	Acid	Straw biochar	4.41	0.04	4.73	0.19	345	345
16	Acid	Straw biochar	4.63	0.01	4.69	0.23	345	345
16	Acid	Straw biochar	4.63	0.01	4.67	0.17	345	345
16	Acid	Straw biochar	4.59	0.2	4.46	0.13	345	345
17	Acid	Straw biochar	4.59	0.2	4.66	0.36	345	345
17	Acid	Straw biochar	6.77	0.04	6.78	0.04	345	345
22	Acid	Straw biochar	6.77	0.04	7	0.05	345	345
22	Acid	Straw biochar	6.65	0.03	6.8	0.09	345	345
22	Acid	Straw biochar	6.65	0.03	6.92	0.07	345	345
22	Acid	Straw biochar	6.89	0.02	7	0.06	345	345
22	Acid	Straw biochar	6.89	0.02	7.1	0.06	345	345
22	Acid	Straw biochar	6.43	0.12	6.65	0.06	345	345
24	Acid	Straw biochar	6.43	0.12	6.8	0.02	345	345
24	Acid	Straw biochar	6.15	0.07	6.3	0.05	345	345
24	Acid	Straw biochar	6.15	0.07	6.51	0.04	345	345
24	Acid	Straw biochar	5.1	0.5	5.1	0.51	345	345
24	Acid	Straw biochar	5.2	0.52	5.24	0.524	345	345
24	Acid	Straw biochar	5.1	0.51	5.07	0.507	345	345
24	Acid	Straw biochar	5.02	0.5	4.95	0.495	345	345
24	Acid	Straw biochar	5.02	0.5	5.01	0.501	345	345
34	Acid	Straw biochar	4.98	0.498	5.03	0.503	345	345
34	Acid	Straw biochar	5.1	0.51	5.08	0.508	345	345
34	Acid	Straw biochar	5.2	0.52	5.29	0.529	345	345
34	Acid	Straw biochar	5.1	0.51	5.02	0.502	345	345
34	Acid	Straw biochar	5.02	0.5	4.99	0.499	345	345
37	Acid	Straw biochar	5.02	0.5	4.99	0.499	345	345
37	Acid	Straw biochar	4.98	0.498	4.96	0.496	345	345
48	Acid	Straw biochar	5.1	0.51	5.1	0.51	345	345
48	Acid	Straw biochar	5.2	0.52	5.38	0.538	345	345
48	Acid	Straw biochar	5.1	0.51	5.22	0.522	345	345
48	Acid	Straw biochar	5.02	0.5	5.1	0.51	345	345
50	Acid	Straw biochar	5.02	0.5	5.1	0.51	345	345
50	Acid	Straw biochar	4.98	0.498	4.94	0.494	345	345
50	Acid	Straw biochar	5	0.5	5	0.5	345	345
50	Acid	Straw biochar	4.97	0.15	5.28	0.18	345	345
50	Acid	Straw biochar	4.84	0.11	5.09	0.14	345	345
50	Acid	Straw biochar	4.95	0.495	5.06	0.26	345	345
50	Acid	Straw biochar	4.97	0.497	5.08	0.508	345	345
50	Acid	Straw biochar	5	0.5	5	0.5	345	345
52	Acid	Straw biochar	4.97	0.15	7.1	0.2	345	345
52	Acid	Straw biochar	4.84	0.11	6.78	0.16	345	345
52	Acid	Straw biochar	4.95	0.495	6.7	0.26	345	345
52	Acid	Straw biochar	4.97	0.497	6.66	0.33	345	345
52	Acid	Straw biochar	5	0.5	5	0.5	345	345
54	Acid	Straw biochar	4.97	0.15	8	0.2	345	345
56	Acid	Straw biochar	4.84	0.11	7.91	0.32	345	345
56	Acid	Straw biochar	4.95	0.495	7.43	0.26	345	345
56	Acid	Straw biochar	4.97	0.497	7.42	0.28	345	345
56	Acid	Straw biochar	5.69	0.08	5.93	0.04	345	345
60	Acid	Straw biochar	5.69	0.08	6.38	0.1	345	345
60	Acid	Straw biochar	5.75	0.08	5.92	0.11	345	345
60	Acid	Straw biochar	5.75	0.08	6.35	0.07	345	345
76	Acid	Straw biochar	5.98	0.2	6.31	0.55	345	345
76	Acid	Straw biochar	5.98	0.2	6.45	0.15	345	345
76	Acid	Straw biochar	5.89	0.2	6.1	0.22	345	345
76	Acid	Straw biochar	5.89	0.2	6.4	0.06	345	345
76	Acid	Straw biochar	3.77	0.01	3.88	0.03	345	345
76	Acid	Straw biochar	5.17	0.03	5.32	0.02	345	345
79	Acid	Straw biochar	4.52	0.04	4.83	0.01	345	345
79	Acid	Straw biochar	3.85	0.01	3.96	0.01	345	345
79	Acid	Straw biochar	3.81	0.02	4.05	0.01	345	345
79	Acid	Straw biochar	5.3	0.03	5.42	0.07	345	345
79	Acid	Straw biochar	5.3	0.03	5.61	0.11	345	345
79	Acid	Straw biochar	4.76	0.07	4.8	0.04	345	345
86	Acid	Straw biochar	4.76	0.07	5.05	0.08	345	345
87	Acid	Straw biochar	4.81	0.02	4.83	0.06	345	345
87	Acid	Straw biochar	4.81	0.02	5.92	0.05	345	345
87	Acid	Straw biochar	5.27	0.0866	5.71	0.38104	345	345
87	Acid	Straw biochar	5.27	0.0866	6.01	0.32908	345	345
87	Acid	Straw biochar	5.27	0.0866	6.12	0.12124	345	345
87	Acid	Straw biochar	5.27	0.0866	6.25	0.01732	345	345
87	Acid	Straw biochar	6.34	0.41568	6.79	0.12124	345	345
87	Acid	Straw biochar	6.34	0.41568	6.97	0.57156	345	345
87	Acid	Straw biochar	6.34	0.41568	6.99	0.41568	345	345
87	Acid	Straw biochar	6.34	0.41568	7.23	0.2598	345	345
87	Acid	Straw biochar	5.54	0.24	6.12	0.04	345	345
87	Acid	Straw biochar	5.49	0.2	6.03	0.17	345	345
87	Acid	Straw biochar	5.37	0.14	5.72	0.06	345	345
87	Acid	Straw biochar	5.42	0.02	5.69	0.27	345	345
87	Acid	Straw biochar	5.23	0.09	5.71	0.11	345	345
87	Acid	Straw biochar	5.71	0.571	6.62	0.662	345	345
87	Acid	Straw biochar	4.61	0.1732	4.65	0.22516	345	345
87	Acid	Straw biochar	4.61	0.1732	4.82	0.12124	345	345
87	Acid	Straw biochar	4.61	0.1732	4.86	0.1732	345	345
96	Acid	Straw biochar	4.61	0.1732	5.22	0.24248	345	345
96	Acid	Straw biochar	5.46	0.546	6.69	0.669	345	345
105	Acid	Straw biochar	5.17	0.517	6.64	0.664	345	345
105	Acid	Straw biochar	4.97	0.497	6.27	0.627	345	345
112	Acid	Straw biochar	4.63	0.463	5.32	0.532	345	345
112	Acid	Straw biochar	5.04	0.504	5.9	0.59	345	345
112	Acid	Straw biochar	5.32	0.532	6	0.6	345	345
112	Acid	Straw biochar	4.84	0.484	5.45	0.545	345	345
112	Acid	Straw biochar	5.13	0.513	5.91	0.591	345	345
112	Acid	Straw biochar	6.08	0.608	6.08	0.608	345	345
112	Acid	Straw biochar	5.4	0.3	6	0.2	345	345
112	Acid	Straw biochar	5.4	0.2	6.6	0.1	345	345
115	Acid	Straw biochar	5.3	0.2	6.2	0.4	345	345
115	Acid	Straw biochar	5.2	0	5.7	0.5	345	345
115	Acid	Straw biochar	5.2	0.2	6	0.4	345	345
115	Acid	Straw biochar	5.5	0.6	5.8	0.3	345	345
115	Acid	Straw biochar	3.9	0.02	4	0.05	345	345
115	Acid	Straw biochar	4.61	0.11	4.89	0.01	345	345
115	Acid	Straw biochar	4.61	0.11	4.96	0.01	345	345
115	Acid	Straw biochar	4.61	0.11	4.94	0.02	345	345
115	Acid	Straw biochar	4.61	0.11	4.98	0.03	345	345
115	Acid	Straw biochar	4.61	0.11	4.89	0.04	345	345
125	Acid	Straw biochar	4.61	0.11	5.02	0.02	345	345
125	Acid	Straw biochar	4.61	0.11	4.96	0.02	345	345
134	Acid	Straw biochar	4.61	0.11	5.2	0	345	345
134	Acid	Straw biochar	4.61	0.11	4.72	0.05	345	345
134	Acid	Straw biochar	4.61	0.11	4.6	0.07	345	345
134	Acid	Straw biochar	5.07	0.15	5.12	0.1	345	345
134	Acid	Straw biochar	5.07	0.15	5.25	0.13	345	345
134	Acid	Straw biochar	5.07	0.15	5.37	0.13	345	345
134	Acid	Straw biochar	5.07	0.15	5.25	0.01	345	345
134	Acid	Straw biochar	5.07	0.15	5.44	0.07	345	345
134	Acid	Straw biochar	5.07	0.15	5.07	0.1	345	345
134	Acid	Straw biochar	5.07	0.15	5.15	0.08	345	345
134	Acid	Straw biochar	5.07	0.15	5.35	0.21	345	345
134	Acid	Straw biochar	5.07	0.15	5.27	0.18	345	345
140	Acid	Straw biochar	5.07	0.15	5.11	0.03	345	345
140	Acid	Straw biochar	4.3	0.02	5.11	0.04	345	345
140	Acid	Straw biochar	4.3	0.02	5.3	0.11	345	345
148	Acid	Straw biochar	4.48	0.04	6.03	0.04	345	345
148	Acid	Straw biochar	4.56	0.04	6.17	0.02	345	345
148	Acid	Straw biochar	4.4	0.1732	4.6	0.19052	345	345
148	Acid	Straw biochar	4.4	0.1732	4.84	0.19052	345	345
155	Acid	Straw biochar	4.4	0.19052	4.69	0.1732	345	345
155	Acid	Straw biochar	4.4	0.19052	5.14	0.20784	345	345
155	Acid	Straw biochar	4.2	0.1732	4.39	0.19052	345	345
161	Acid	Straw biochar	4.2	0.1732	4.87	0.20784	345	345
161	Acid	Straw biochar	4.14	0.15588	4.32	0.1732	345	345
161	Acid	Straw biochar	4.14	0.15588	4.64	0.19052	345	345
161	Acid	Straw biochar	5.67	0.22516	6.32	0.15588	345	345
208	Acid	Straw biochar	6.02	0.06928	6.24	0.13856	345	345
208	Acid	Straw biochar	6.32	0.12124	6.5	0	345	345
208	Acid	Straw biochar	5.75	0.0866	6.06	0.0866	345	345
208	Acid	Straw biochar	5.89	0.13856	6.11	0.13856	345	345
208	Acid	Straw biochar	5.67	0.22516	6.24	0.22516	345	345
208	Acid	Straw biochar	6.02	0.06928	6.5	0.06928	345	345
209	Acid	Straw biochar	6.32	0.12124	6.5	0.06928	345	345
209	Acid	Straw biochar	5.75	0.0866	6.06	0.0866	345	345
209	Acid	Straw biochar	5.89	0.13856	6.32	0.31176	345	345
209	Acid	Straw biochar	5.2	0	5.5	0	345	345
209	Acid	Straw biochar	5.2	0	5.9	0	345	345
209	Acid	Straw biochar	3.95	0.01732	4.3	0.01732	345	345
211	Acid	Straw biochar	3.95	0.01732	4.6	0	345	345
211	Acid	Straw biochar	3.95	0.01732	5.17	0.03464	345	345
226	Acid	Straw biochar	3.95	0.01732	4.35	0	345	345
226	Acid	Straw biochar	3.95	0.01732	4.48	0.01732	345	345
226	Acid	Straw biochar	3.95	0.01732	4.8	0.01732	345	345
226	Acid	Straw biochar	3.95	0.01732	4.36	0	345	345
229	Acid	Straw biochar	3.95	0.01732	4.82	0.05196	345	345
231	Acid	Straw biochar	3.95	0.01732	5.2	0.01732	345	345
231	Acid	Straw biochar	3.95	0.01732	4.4	0	345	345
233	Acid	Straw biochar	3.95	0.01732	4.86	0.01732	345	345
233	Acid	Straw biochar	3.95	0.01732	5.22	0.01732	345	345
235	Acid	Straw biochar	5.7	0.01	5.78	0.02	345	345
263	Acid	Straw biochar	5.7	0.01	6	0.05	345	345
263	Acid	Straw biochar	5.7	0.01	6.15	0.05	345	345
263	Acid	Straw biochar	6.64	0.02	6.67	0.03	345	345
263	Acid	Straw biochar	6.64	0.02	6.82	0.02	345	345
263	Acid	Straw biochar	6.64	0.02	6.94	0.02	345	345
263	Acid	Straw biochar	6.64	0.02	7.09	0.01	345	345
263	Acid	Straw biochar	5.01	0.501	5.23	0.523	345	345
263	Acid	Straw biochar	5.09	0.509	5.11	0.511	345	345
263	Acid	Straw biochar	5.11	0.511	5.1	0.51	345	345
263	Acid	Straw biochar	5.04	0.504	5.16	0.516	345	345
263	Acid	Straw biochar	5.26	0.12124	5.43	0.19052	345	345
265	Acid	Straw biochar	5.26	0.12124	5.76	0.29444	345	345
265	Acid	Straw biochar	5.74	0.24248	5.97	0.06928	345	345
265	Acid	Straw biochar	5.74	0.24248	6.4	0.13856	345	345
265	Acid	Straw biochar	8.33	0.72744	7.84	0.67548	345	345
265	Acid	Straw biochar	4.31	0.01732	4.39	0.03464	345	345
265	Acid	Straw biochar	4.31	0.01732	4.54	0.01732	345	345
265	Acid	Straw biochar	4.31	0.01732	4.67	0.10392	345	345
265	Acid	Straw biochar	4.29	0.03464	4.73	0.10392	345	345
265	Acid	Straw biochar	4.29	0.03464	4.4	0.1732	345	345
265	Acid	Straw biochar	4.29	0.03464	4.51	0.05196	345	345
265	Acid	Straw biochar	3.47	0.347	4.75	0.475	345	345
265	Acid	Straw biochar	3.47	0.347	3.74	0.374	345	345
265	Acid	Straw biochar	3.47	0.347	4	0.4	345	345
265	Acid	Straw biochar	3.47	0.347	4.41	0.441	345	345
265	Acid	Straw biochar	3.47	0.347	3.71	0.371	345	345
265	Acid	Straw biochar	3.69	0.369	4.71	0.471	345	345
265	Acid	Straw biochar	4.74	0.11	4.82	0.19	345	345
265	Acid	Straw biochar	4.74	0.11	4.97	0.05	345	345
265	Acid	Straw biochar	5.63	0.563	5.84	0.584	345	345
265	Acid	Straw biochar	5.63	0.563	5.93	0.593	345	345
265	Acid	Straw biochar	5.38	0.538	5.49	0.549	345	345
265	Acid	Straw biochar	5.38	0.538	5.79	0.579	345	345
265	Acid	Straw biochar	5.95	0.1	6.88	0.1	345	345
265	Acid	Straw biochar	6.01	0.033	6.19	0.063	345	345
265	Acid	Straw biochar	5.06	0.038	5.16	0.097	345	345
265	Acid	Straw biochar	5.83	0.583	6.36	0.636	345	345
265	Acid	Straw biochar	5.83	0.583	6.65	0.665	345	345
265	Acid	Straw biochar	4.5	0.16	4.92	0.16	345	345
265	Acid	Straw biochar	4.8	0.13856	4.97	0.10392	345	345
265	Acid	Straw biochar	4.8	0.13856	4.97	0.24248	345	345
276	Acid	Straw biochar	4.8	0.13856	5.12	0.31176	345	345
276	Acid	Straw biochar	4.8	0.13856	5.04	0.19052	345	345
283	Acid	Straw biochar	4.8	0.13856	5.21	0.29444	345	345
283	Acid	Straw biochar	4.8	0.13856	5.23	0.10392	345	345
283	Acid	Straw biochar	4.81	0.06928	4.74	0.12124	345	345
283	Acid	Straw biochar	4.81	0.06928	4.81	0.20784	345	345
293	Acid	Straw biochar	4.81	0.06928	4.87	0.19052	345	345
324	Acid	Straw biochar	4.81	0.06928	4.91	0.12124	345	345
324	Acid	Straw biochar	4.81	0.06928	4.87	0.15588	345	345
324	Acid	Straw biochar	4.81	0.06928	5.13	0.24248	345	345
324	Acid	Straw biochar	4.79	0.09	4.84	0.07	345	345
326	Acid	Straw biochar	4.79	0.09	4.88	0.07	345	345
326	Acid	Straw biochar	4.79	0.09	5.02	0.08	345	345
332	Acid	Straw biochar	4.79	0.09	5.19	0.07	345	345
332	Acid	Straw biochar	4.79	0.09	5.21	0.05	345	345
332	Acid	Straw biochar	4.79	0.09	5.32	0.04	345	345
332	Acid	Straw biochar	4.65	0.08	4.76	0.05	345	345
332	Acid	Straw biochar	4.65	0.08	4.88	0.08	345	345
332	Acid	Straw biochar	4.65	0.08	4.8	0.08	345	345
333	Acid	Straw biochar	4.65	0.08	4.91	0.06	345	345
333	Acid	Straw biochar	4.65	0.08	5.04	0.06	345	345
342	Acid	Straw biochar	4.65	0.08	5.04	0.08	345	345
342	Acid	Straw biochar	4.63	0.05	4.75	0.08	345	345
342	Acid	Straw biochar	4.63	0.05	4.73	0.07	345	345
353	Acid	Straw biochar	4.63	0.05	4.8	0.07	345	345
353	Acid	Straw biochar	4.63	0.05	4.88	0.05	345	345
353	Acid	Straw biochar	4.63	0.05	4.81	0.07	345	345
353	Acid	Straw biochar	4.63	0.05	5.02	0.04	345	345
366	Acid	Straw biochar	4.57	0.07	4.6	0.06	345	345
392	Acid	Straw biochar	4.57	0.07	4.76	0.07	345	345
392	Acid	Straw biochar	4.57	0.07	4.73	0.07	345	345
392	Acid	Straw biochar	4.57	0.07	4.79	0.04	345	345
392	Acid	Straw biochar	4.57	0.07	4.8	0.07	345	345
392	Acid	Straw biochar	4.57	0.07	4.75	0.05	345	345
392	Acid	Straw biochar	4.34	0.04	4.36	0.07	345	345
392	Acid	Straw biochar	4.34	0.04	4.36	0.05	345	345
392	Acid	Straw biochar	4.34	0.04	4.58	0.06	345	345
392	Acid	Straw biochar	4.34	0.04	4.52	0.04	345	345
392	Acid	Straw biochar	4.34	0.04	4.65	0.04	345	345
392	Acid	Straw biochar	4.34	0.04	4.66	0.05	345	345
392	Acid	Straw biochar	5.75	0.02	5.82	0.03	345	345
392	Acid	Straw biochar	5.75	0.02	5.89	0.02	345	345
392	Acid	Straw biochar	6.07	0.12	6.07	0.12	345	345
392	Acid	Straw biochar	6.07	0.12	6.19	0.08	345	345
392	Acid	Straw biochar	5.66	0.04	6.09	0.08	345	345
392	Acid	Straw biochar	5.66	0.04	6.21	0.12	345	345
392	Acid	Straw biochar	5.9	0.3464	6.5	0.0866	345	345
392	Acid	Straw biochar	5.36	0.05	5.59	0.02	345	345
393	Acid	Straw biochar	5.36	0.05	5.63	0.05	345	345
396	Acid	Straw biochar	5.36	0.05	5.69	0.06	345	345
396	Acid	Straw biochar	5.36	0.05	5.74	0.03	345	345
396	Acid	Straw biochar	5.93	0.6062	6.11	0.15588	345	345
413	Acid	Straw biochar	5.93	0.6062	6.46	0.03464	345	345
413	Acid	Straw biochar	4.88	0.05	4.99	0.13	345	345
413	Acid	Straw biochar	4.88	0.05	5.12	0.01	345	345
413	Acid	Straw biochar	6.01	0.06	6.15	0.02	345	345
413	Acid	Straw biochar	6.01	0.06	6.29	0.15	345	345
413	Acid	Straw biochar	5.54	0.23	5.89	0.05	345	345
413	Acid	Straw biochar	5.54	0.23	6.26	0.17	345	345
413	Acid	Straw biochar	6.09	0.06	6.14	0.07	345	345
413	Acid	Straw biochar	6.09	0.06	6.65	0.05	345	345
413	Acid	Straw biochar	5.51	0.05196	6.23	0.15588	345	345
413	Acid	Straw biochar	5.42	0.06928	6.5	0.05196	345	345
413	Acid	Straw biochar	5.32	0.29444	6.26	0.0866	345	345
413	Acid	Straw biochar	5.11	0.06928	5.15	0	345	345
413	Acid	Straw biochar	5.11	0.06928	5.31	0	345	345
413	Acid	Straw biochar	5.06	0.506	5.15	0.515	345	345
413	Acid	Straw biochar	5.06	0.506	5.1	0.51	345	345
413	Acid	Straw biochar	5.27	0.08	3.64	0.04	345	345
413	Acid	Straw biochar	5.27	0.08	3.68	0.06	345	345
413	Acid	Straw biochar	6.24	0.08	5.79	0.05	345	345
413	Acid	Straw biochar	6.24	0.08	5.26	0.08	345	345
413	Acid	Straw biochar	5.9	0.28	7.58	0.39	345	345
413	Acid	Straw biochar	4.77	0.477	4.81	0.481	345	345
413	Acid	Straw biochar	4.77	0.477	5.05	0.505	345	345
413	Acid	Straw biochar	4.6	0.46	4.77	0.477	345	345
413	Acid	Straw biochar	4.6	0.46	6.18	0.618	345	345
413	Acid	Straw biochar	4.39	0.439	4.53	0.453	345	345
413	Acid	Straw biochar	4.39	0.439	6.45	0.645	345	345
413	Acid	Straw biochar	4.7	0.47	5.05	0.505	345	345
413	Acid	Straw biochar	4.7	0.47	7.28	0.728	345	345
413	Acid	Straw biochar	4.12	0.412	4.6	0.46	345	345
413	Acid	Straw biochar	4.12	0.412	7.18	0.718	345	345
413	Acid	Straw biochar	4.81	0.481	4.84	0.484	345	345
413	Acid	Straw biochar	4.81	0.481	5.94	0.594	345	345
413	Acid	Straw biochar	5.08	0.508	5.22	0.522	345	345
413	Acid	Straw biochar	5.08	0.508	6.76	0.676	345	345
413	Acid	Straw biochar	4.91	0.491	4.81	0.481	345	345
413	Acid	Straw biochar	4.91	0.491	6.56	0.656	345	345
413	Acid	Straw biochar	4.81	0.481	5.12	0.512	345	345
413	Acid	Straw biochar	4.81	0.481	7.31	0.731	345	345
413	Acid	Straw biochar	3.78	0.378	4.53	0.453	345	345
413	Acid	Straw biochar	3.78	0.378	7.07	0.707	345	345
413	Acid	Straw biochar	4.09	0.1732	4.43	0.19052	345	345
413	Acid	Straw biochar	5.21	0.14	6.82	0.18	345	345
413	Acid	Straw biochar	5.21	0.14	6.78	0.16	345	345
413	Acid	Straw biochar	5.21	0.14	6.41	0.15	345	345
413	Acid	Straw biochar	6.19	0.01	6.25	0.07	345	345
425	Acid	Straw biochar	6.19	0.01	6.3	0.06	345	345
425	Acid	Straw biochar	6.19	0.01	6.47	0.03	345	345
425	Acid	Straw biochar	6.19	0.01	6.8	0.05	345	345
438	Acid	Straw biochar	6.19	0.02	6.48	0.02	345	345
438	Acid	Straw biochar	6.19	0.02	6.69	0.09	345	345
438	Acid	Straw biochar	6.19	0.02	6.98	0.01	345	345
438	Acid	Straw biochar	6.19	0.02	7.8	0.04	345	345
448	Acid	Straw biochar	6.31	0.06	6.31	0.06	345	345
448	Acid	Straw biochar	6.31	0.06	6.32	0.06	345	345
448	Acid	Straw biochar	6.31	0.06	6.38	0.02	345	345
468	Acid	Straw biochar	6.31	0.06	6.55	0.06	345	345
468	Acid	Straw biochar	6.19	0.11	6.36	0.03	345	345
468	Acid	Straw biochar	6.19	0.11	6.48	0.06	345	345
468	Acid	Straw biochar	6.19	0.11	6.8	0.04	345	345
468	Acid	Straw biochar	6.19	0.11	7.51	0.08	345	345
473	Acid	Straw biochar	6.22	0.07	6.35	0.04	345	345
473	Acid	Straw biochar	6.22	0.07	6.41	0.04	345	345
473	Acid	Straw biochar	6.22	0.07	6.51	0.05	345	345
473	Acid	Straw biochar	6.22	0.07	6.84	0.12	345	345
473	Acid	Straw biochar	6.32	0.04	6.53	0.05	345	345
473	Acid	Straw biochar	6.32	0.04	6.75	0.06	345	345
473	Acid	Straw biochar	6.32	0.04	7.02	0.04	345	345
473	Acid	Straw biochar	6.32	0.04	7.83	0.02	345	345
474	Acid	Straw biochar	6.32	0.06	6.35	0.04	345	345
474	Acid	Straw biochar	6.32	0.06	6.41	0.08	345	345
474	Acid	Straw biochar	6.32	0.06	6.45	0.07	345	345
474	Acid	Straw biochar	6.32	0.06	6.59	0.01	345	345
474	Acid	Straw biochar	6.39	0.07	6.38	0.06	345	345
474	Acid	Straw biochar	6.39	0.07	6.52	0.04	345	345
474	Acid	Straw biochar	6.39	0.07	6.82	0.08	345	345
474	Acid	Straw biochar	6.39	0.07	7.54	0.09	345	345
474	Acid	Straw biochar	6.24	0.08	6.28	0.11	345	345
482	Acid	Straw biochar	6.24	0.08	6.38	0.08	345	345
482	Acid	Straw biochar	6.24	0.08	6.51	0.08	345	345
482	Acid	Straw biochar	6.24	0.08	6.87	0.15	345	345
482	Acid	Straw biochar	6.35	0.05	6.54	0.05	345	345
482	Acid	Straw biochar	6.35	0.05	6.75	0.04	345	345
482	Acid	Straw biochar	6.35	0.05	7.01	0.01	345	345
523	Acid	Straw biochar	6.35	0.05	7.89	0.04	345	345
559	Acid	Straw biochar	6.31	0.08	6.28	0.06	345	345
559	Acid	Straw biochar	6.31	0.08	6.33	0.05	345	345
559	Acid	Straw biochar	6.31	0.08	6.38	0.01	345	345
559	Acid	Straw biochar	6.31	0.08	6.58	0.03	345	345
565	Acid	Straw biochar	6.27	0.05	6.35	0.06	345	345
565	Acid	Straw biochar	6.27	0.05	6.44	0.06	345	345
68	Neutral	Straw biochar	6.53	0.11	6.75	0.08	36	36
68	Neutral	Straw biochar	6.53	0.11	6.77	0.18	36	36
68	Neutral	Straw biochar	6.53	0.11	6.77	0.12	36	36
68	Neutral	Straw biochar	6.53	0.04	6.73	0.21	36	36
68	Neutral	Straw biochar	6.53	0.04	6.77	0.05	36	36
68	Neutral	Straw biochar	6.53	0.04	6.89	0.11	36	36
111	Neutral	Straw biochar	6.67	0.03	6.74	0.03	36	36
111	Neutral	Straw biochar	6.64	0.01	6.71	0.05	36	36
111	Neutral	Straw biochar	6.62	0.03	6.69	0.02	36	36
111	Neutral	Straw biochar	6.71	0.04	6.76	0.02	36	36
111	Neutral	Straw biochar	6.72	0.01	6.75	0.04	36	36
111	Neutral	Straw biochar	6.72	0.02	6.75	0.01	36	36
301	Neutral	Straw biochar	6.69	0.13856	7.08	0.06928	36	36
301	Neutral	Straw biochar	6.69	0.13856	7.14	0.06928	36	36
301	Neutral	Straw biochar	6.69	0.13856	7.17	0.10392	36	36
370	Neutral	Straw biochar	7.31	0.35	7.61	0.32	36	36
370	Neutral	Straw biochar	7.31	0.35	7.81	0.15	36	36
370	Neutral	Straw biochar	7.31	0.35	8.06	0.1	36	36
370	Neutral	Straw biochar	7.31	0.35	8.18	0.15	36	36
370	Neutral	Straw biochar	7.24	0.1	7.46	0.03	36	36
370	Neutral	Straw biochar	7.24	0.1	7.51	0.23	36	36
370	Neutral	Straw biochar	7.24	0.1	7.49	0.05	36	36
370	Neutral	Straw biochar	7.24	0.1	8.03	0.1	36	36
445	Neutral	Straw biochar	6.38	0.638	6.56	0.656	36	36
445	Neutral	Straw biochar	6.38	0.638	7.12	0.712	36	36
445	Neutral	Straw biochar	6.38	0.638	7.72	0.772	36	36
476	Neutral	Straw biochar	6.52	0.13856	6.85	0.32908	36	36
494	Neutral	Straw biochar	6.84	0.06928	6.89	0.0866	36	36
494	Neutral	Straw biochar	6.84	0.06928	6.98	0.05196	36	36
494	Neutral	Straw biochar	6.84	0.06928	6.97	0.01732	36	36
494	Neutral	Straw biochar	6.96	0.06928	7	0.10392	36	36
494	Neutral	Straw biochar	6.96	0.06928	7.05	0.03464	36	36
494	Neutral	Straw biochar	6.96	0.06928	7.1	0.06928	36	36
508	Neutral	Straw biochar	6.38	0.638	6.56	0.656	36	36
508	Neutral	Straw biochar	6.38	0.638	7.12	0.712	36	36
508	Neutral	Straw biochar	6.38	0.638	7.72	0.772	36	36
32	Alkaline	Straw biochar	7.87	0.11	7.91	0.07	128	128
32	Alkaline	Straw biochar	7.87	0.11	7.79	0.18	128	128
32	Alkaline	Straw biochar	8.01	0.08	8.15	0.18	128	128
32	Alkaline	Straw biochar	8.01	0.08	7.99	0.08	128	128
40	Alkaline	Straw biochar	8.47	0.04	8.33	0.08	128	128
40	Alkaline	Straw biochar	8.47	0.04	8.29	0.06	128	128
40	Alkaline	Straw biochar	8.47	0.04	8.27	0.05	128	128
40	Alkaline	Straw biochar	8.47	0.04	8.15	0.04	128	128
40	Alkaline	Straw biochar	8.47	0.04	8.26	0.08	128	128
40	Alkaline	Straw biochar	8.47	0.04	8.28	0.06	128	128
40	Alkaline	Straw biochar	8.47	0.04	8.35	0.04	128	128
40	Alkaline	Straw biochar	8.47	0.04	8.29	0.04	128	128
40	Alkaline	Straw biochar	8.47	0.04	8.28	0.04	128	128
40	Alkaline	Straw biochar	8.47	0.04	8.07	0.07	128	128
40	Alkaline	Straw biochar	8.47	0.04	8.18	0.04	128	128
40	Alkaline	Straw biochar	8.47	0.04	8.24	0.02	128	128
40	Alkaline	Straw biochar	8.35	0.1	8.11	0.06	128	128
40	Alkaline	Straw biochar	8.35	0.1	8.03	0.06	128	128
40	Alkaline	Straw biochar	8.35	0.1	7.87	0.1	128	128
40	Alkaline	Straw biochar	8.35	0.1	7.71	0.06	128	128
40	Alkaline	Straw biochar	8.35	0.1	7.77	0.12	128	128
40	Alkaline	Straw biochar	8.35	0.1	7.81	0.09	128	128
40	Alkaline	Straw biochar	8.29	0.06	8.17	0.06	128	128
40	Alkaline	Straw biochar	8.29	0.06	8.13	0.1	128	128
40	Alkaline	Straw biochar	8.29	0.06	8.13	0.02	128	128
40	Alkaline	Straw biochar	8.29	0.06	7.93	0.06	128	128
40	Alkaline	Straw biochar	8.29	0.06	7.96	0.02	128	128
40	Alkaline	Straw biochar	8.29	0.06	8.12	0.06	128	128
48	Alkaline	Straw biochar	8.43	0.03	8.39	0.03	128	128
48	Alkaline	Straw biochar	8.43	0.03	8.43	0.01	128	128
48	Alkaline	Straw biochar	8.2	0.02	8.23	0.05	128	128
48	Alkaline	Straw biochar	8.2	0.02	8.16	0.03	128	128
61	Alkaline	Straw biochar	8.06	0.05	8.15	0.05	128	128
61	Alkaline	Straw biochar	8.06	0.05	8.17	0.07	128	128
61	Alkaline	Straw biochar	8.06	0.05	8.18	0.03	128	128
66	Alkaline	Straw biochar	8.01	0.01	8.07	0.04	128	128
66	Alkaline	Straw biochar	8.01	0.01	8.09	0.05	128	128
91	Alkaline	Straw biochar	8.28	0.05196	7.93	0.41568	128	128
91	Alkaline	Straw biochar	8.28	0.05196	8.14	0.05196	128	128
91	Alkaline	Straw biochar	8.28	0.05196	8.15	0.03464	128	128
146	Alkaline	Straw biochar	8.08	0.808	7.88	0.788	128	128
146	Alkaline	Straw biochar	8.08	0.808	7.86	0.786	128	128
146	Alkaline	Straw biochar	8.08	0.808	7.85	0.785	128	128
146	Alkaline	Straw biochar	8.08	0.808	8.05	0.805	128	128
146	Alkaline	Straw biochar	8.08	0.808	7.99	0.799	128	128
162	Alkaline	Straw biochar	8.44	0.844	8.65	0.865	128	128
162	Alkaline	Straw biochar	8.44	0.844	8.68	0.868	128	128
162	Alkaline	Straw biochar	8.44	0.844	8.7	0.87	128	128
162	Alkaline	Straw biochar	8.41	0.841	8.54	0.854	128	128
162	Alkaline	Straw biochar	8.41	0.841	8.56	0.856	128	128
162	Alkaline	Straw biochar	8.41	0.841	8.56	0.856	128	128
162	Alkaline	Straw biochar	8.31	0.831	8.4	0.84	128	128
162	Alkaline	Straw biochar	8.31	0.831	8.43	0.843	128	128
162	Alkaline	Straw biochar	8.31	0.831	8.45	0.845	128	128
162	Alkaline	Straw biochar	8.46	0.846	8.69	0.869	128	128
162	Alkaline	Straw biochar	8.46	0.846	8.71	0.871	128	128
162	Alkaline	Straw biochar	8.46	0.846	8.73	0.873	128	128
162	Alkaline	Straw biochar	8.42	0.842	8.55	0.855	128	128
162	Alkaline	Straw biochar	8.42	0.842	8.56	0.856	128	128
162	Alkaline	Straw biochar	8.42	0.842	8.58	0.858	128	128
162	Alkaline	Straw biochar	8.33	0.833	8.42	0.842	128	128
162	Alkaline	Straw biochar	8.33	0.833	8.44	0.844	128	128
162	Alkaline	Straw biochar	8.33	0.833	8.46	0.846	128	128
240	Alkaline	Straw biochar	7.08	0.2598	7.23	0.3464	128	128
240	Alkaline	Straw biochar	7.08	0.2598	7.22	0.2598	128	128
240	Alkaline	Straw biochar	7.08	0.2598	7.41	0.48496	128	128
240	Alkaline	Straw biochar	7.66	0.2598	7.7	0.2598	128	128
240	Alkaline	Straw biochar	7.66	0.2598	7.81	0.39836	128	128
240	Alkaline	Straw biochar	7.66	0.2598	7.94	0.79672	128	128
241	Alkaline	Straw biochar	8.63	0.06928	8.89	0.03464	128	128
303	Alkaline	Straw biochar	8.03	0.803	8.36	0.836	128	128
303	Alkaline	Straw biochar	8.3	0.83	8.24	0.824	128	128
303	Alkaline	Straw biochar	8.23	0.823	8.39	0.839	128	128
303	Alkaline	Straw biochar	8.3	0.83	8.24	0.824	128	128
319	Alkaline	Straw biochar	8.18	0.12124	8.4	0.20784	128	128
342	Alkaline	Straw biochar	8.73	0.03464	8.78	0.15588	128	128
342	Alkaline	Straw biochar	8.75	0.36372	8.68	0.10392	128	128
342	Alkaline	Straw biochar	8.36	0.2598	8.52	0.3464	128	128
400	Alkaline	Straw biochar	8.46	0.01	8.47	0.04	128	128
400	Alkaline	Straw biochar	8.42	0.01	8.41	0.03	128	128
400	Alkaline	Straw biochar	8.39	0.02	8.37	0.02	128	128
400	Alkaline	Straw biochar	8.37	0	8.38	0.04	128	128
402	Alkaline	Straw biochar	8.16	0.01	8.16	0.06	128	128
402	Alkaline	Straw biochar	8.16	0.01	8.19	0.06	128	128
402	Alkaline	Straw biochar	8.16	0.01	8.15	0	128	128
402	Alkaline	Straw biochar	8.39	0.02	8.43	0.08	128	128
402	Alkaline	Straw biochar	8.39	0.02	8.44	0.03	128	128
402	Alkaline	Straw biochar	8.39	0.02	8.37	0.02	128	128
419	Alkaline	Straw biochar	8.2	0.82	8	0.8	128	128
419	Alkaline	Straw biochar	8	0.8	7.8	0.78	128	128
441	Alkaline	Straw biochar	8.4	0.01732	8.32	0.01732	128	128
441	Alkaline	Straw biochar	8.38	0.01732	8.32	0.01732	128	128
442	Alkaline	Straw biochar	8.25	0.06	8.23	0.04	128	128
442	Alkaline	Straw biochar	8.25	0.06	8.18	0.04	128	128
442	Alkaline	Straw biochar	8.25	0.06	8.01	0.06	128	128
462	Alkaline	Straw biochar	8.21	0.02	8.32	0.02	128	128
462	Alkaline	Straw biochar	8.21	0.02	8.35	0.04	128	128
462	Alkaline	Straw biochar	8.21	0.02	8.35	0.02	128	128
462	Alkaline	Straw biochar	8.21	0.02	8.37	0.04	128	128
462	Alkaline	Straw biochar	8.22	0.03	8.18	8.2	128	128
462	Alkaline	Straw biochar	8.22	0.03	8.23	0.04	128	128
462	Alkaline	Straw biochar	8.22	0.03	8.21	8.25	128	128
462	Alkaline	Straw biochar	8.22	0.03	8.19	8.21	128	128
462	Alkaline	Straw biochar	8.04	0.03	8.1	0.07	128	128
462	Alkaline	Straw biochar	8.04	0.03	8.08	0.07	128	128
462	Alkaline	Straw biochar	8.04	0.03	8.05	0.01	128	128
462	Alkaline	Straw biochar	8.04	0.03	8.05	0.07	128	128
463	Alkaline	Straw biochar	7.66	0.20784	7.7	0.13856	128	128
463	Alkaline	Straw biochar	7.66	0.20784	7.81	0.20784	128	128
463	Alkaline	Straw biochar	7.66	0.20784	7.93	0.793	128	128
476	Alkaline	Straw biochar	8.89	0.2598	9.05	0.45032	128	128
501	Alkaline	Straw biochar	8.19	0.12124	8.3	0.10392	128	128
501	Alkaline	Straw biochar	8.19	0.12124	8.26	0.01732	128	128
501	Alkaline	Straw biochar	8.19	0.12124	8.33	0.06928	128	128
501	Alkaline	Straw biochar	8.1	0.06928	8.08	0.0866	128	128
501	Alkaline	Straw biochar	8.1	0.06928	8.1	0.10392	128	128
501	Alkaline	Straw biochar	8.1	0.06928	8.15	0.03464	128	128
501	Alkaline	Straw biochar	8.02	0.24248	8.2	0.29444	128	128
501	Alkaline	Straw biochar	8.02	0.24248	8.21	0.2598	128	128
501	Alkaline	Straw biochar	8.02	0.24248	8.27	0.12124	128	128
501	Alkaline	Straw biochar	8.27	0.06928	8.24	0.06928	128	128
501	Alkaline	Straw biochar	8.27	0.06928	8.31	0.29444	128	128
501	Alkaline	Straw biochar	8.27	0.06928	8.35	0.20784	128	128
501	Alkaline	Straw biochar	8.37	0.06928	8.42	0.06928	128	128
501	Alkaline	Straw biochar	8.37	0.06928	8.49	0.0866	128	128
501	Alkaline	Straw biochar	8.37	0.06928	8.49	0.12124	128	128
565	Alkaline	Straw biochar	7.88	0.01732	8.3	0	128	128
565	Alkaline	Straw biochar	8.08	0.01732	8.42	0.01732	128	128
13	Acid	Wood biochar	6.4	0.13416	7.2	0.1118	44	44
13	Acid	Wood biochar	6.4	0.13416	7.58	0.1118	44	44
13	Acid	Wood biochar	6.4	0.13416	7.8	0.06708	44	44
13	Acid	Wood biochar	6.4	0.13416	7.11	0.08944	44	44
13	Acid	Wood biochar	6.4	0.13416	7.48	0.15652	44	44
13	Acid	Wood biochar	6.4	0.13416	7.69	0.04472	44	44
13	Acid	Wood biochar	6.4	0.13416	7.24	0.04472	44	44
13	Acid	Wood biochar	6.4	0.13416	7.53	0.1118	44	44
13	Acid	Wood biochar	6.4	0.13416	7.8	0.04472	44	44
96	Acid	Wood biochar	4.3	0.02	4.74	0.06	44	44
96	Acid	Wood biochar	4.3	0.02	5.2	0.01	44	44
128	Acid	Wood biochar	5.71	0.05196	5.96	0.03464	44	44
128	Acid	Wood biochar	5.71	0.05196	6.17	0.0866	44	44
128	Acid	Wood biochar	5.71	0.05196	6.33	0.03464	44	44
219	Acid	Wood biochar	6.42	0.05	6.68	0.12	44	44
231	Acid	Wood biochar	6.01	0.033	6.16	0.066	44	44
231	Acid	Wood biochar	5.06	0.038	5.13	0.068	44	44
322	Acid	Wood biochar	5.56	0.0866	6.33	0.10392	44	44
322	Acid	Wood biochar	5.56	0.0866	6.67	0.0866	44	44
322	Acid	Wood biochar	3.83	0.19052	4.17	0.0866	44	44
322	Acid	Wood biochar	3.83	0.19052	4.56	0.0866	44	44
509	Acid	Wood biochar	5.99	0.10392	6.07	0.05196	44	44
509	Acid	Wood biochar	5.99	0.10392	6.22	0.06928	44	44
509	Acid	Wood biochar	5.99	0.10392	6.66	0.10392	44	44
509	Acid	Wood biochar	5.69	0.13856	5.94	0.06928	44	44
509	Acid	Wood biochar	5.69	0.13856	6.3	0.06928	44	44
509	Acid	Wood biochar	5.69	0.13856	6.7	0.05196	44	44
565	Acid	Wood biochar	5.68	0.03464	5.79	0.06928	44	44
565	Acid	Wood biochar	5.71	0.03464	5.79	0.03464	44	44
577	Acid	Wood biochar	6.07	0	6.43	0	44	44
577	Acid	Wood biochar	6.07	0	6.49	0.15588	44	44
577	Acid	Wood biochar	6.27	0.05196	6.39	0.06928	44	44
577	Acid	Wood biochar	6.27	0.05196	6.78	0	44	44
577	Acid	Wood biochar	6.78	0.05196	6.33	0.05196	44	44
577	Acid	Wood biochar	6.78	0.05196	7.04	0.06928	44	44
577	Acid	Wood biochar	5.98	0.15588	5.75	0.05196	44	44
577	Acid	Wood biochar	5.98	0.15588	6.01	0.3464	44	44
577	Acid	Wood biochar	6.07	0.05196	5.65	0.22516	44	44
577	Acid	Wood biochar	6.07	0.05196	5.94	0.06928	44	44
577	Acid	Wood biochar	5.69	0.15588	5.98	0.10392	44	44
577	Acid	Wood biochar	5.69	0.15588	5.98	0.05196	44	44
577	Acid	Wood biochar	6.82	0.05196	6.59	0.12124	44	44
577	Acid	Wood biochar	6.82	0.05196	6.62	0.12124	44	44
577	Acid	Wood biochar	6.85	0.10392	6.66	0.10392	44	44
	Alkaline	Wood biochar	7.72	0.03464	7.73	0.03464	17	17
	Alkaline	Wood biochar	7.72	0.03464	7.76	0.05196	17	17
	Alkaline	Wood biochar	7.72	0.03464	7.79	0.05196	17	17
	Alkaline	Wood biochar	7.72	0.03464	7.83	0.05196	17	17
	Alkaline	Wood biochar	8	0.03464	8.07	0.03464	17	17
	Alkaline	Wood biochar	8	0.03464	8.11	0.06928	17	17
	Alkaline	Wood biochar	8	0.03464	8.13	0.03464	17	17
	Alkaline	Wood biochar	8.25	0.06	8.18	0.03	17	17
	Alkaline	Wood biochar	8.25	0.06	8.11	0.04	17	17
	Alkaline	Wood biochar	8.25	0.06	7.99	0.01	17	17
	Alkaline	Wood biochar	7.99	0.05196	7.62	0.10392	17	17
	Alkaline	Wood biochar	8.02	0.06928	7.95	0.06928	17	17
	Alkaline	Wood biochar	8.85	0.885	8.76	0.876	17	17
	Alkaline	Wood biochar	8.85	0.885	8.81	0.881	17	17
	Alkaline	Wood biochar	8.85	0.885	8.91	0.891	17	17
	Alkaline	Wood biochar	7.88	0.01732	8.19	0	17	17
	Alkaline	Wood biochar	8.08	0.01732	8.23	0.01732	17	17
53	Acid	Other biochar	6.51	0.0866	6.53	0.12124	8	8
53	Acid	Other biochar	6.51	0.0866	6.53	0.13856	8	8
53	Acid	Other biochar	6.51	0.0866	6.59	0.0866	8	8
53	Acid	Other biochar	6.51	0.0866	6.62	0.12124	8	8
136	Acid	Other biochar	4.08	0.408	4.35	0.435	8	8
136	Acid	Other biochar	4.08	0.408	4.55	0.435	8	8
211	Acid	Other biochar	4.74	0.11	5.88	0.15	8	8
211	Acid	Other biochar	4.74	0.11	6.56	0.25	8	8
232	Neutral	Other biochar	7.17	0.717	7.35	0.735	9	9
232	Neutral	Other biochar	7.17	0.717	7.4	0.74	9	9
232	Neutral	Other biochar	7.17	0.717	7.43	0.743	9	9
232	Neutral	Other biochar	7.17	0.717	7.34	0.734	9	9
232	Neutral	Other biochar	7.17	0.717	7.55	0.755	9	9
232	Neutral	Other biochar	7.17	0.717	7.65	0.765	9	9
232	Neutral	Other biochar	7.17	0.717	7.63	0.763	9	9
232	Neutral	Other biochar	7.17	0.717	7.7	0.77	9	9
232	Neutral	Other biochar	7.17	0.717	7.79	0.779	9	9
	Alkaline	Other biochar	8.08	0.02	8.26	0.03	14	14
	Alkaline	Other biochar	7.22	0.03	7.62	0.03	14	14
	Alkaline	Other biochar	7.87	0.01732	8.13	0.06928	14	14
	Alkaline	Other biochar	7.87	0.01732	8.21	0.05196	14	14
	Alkaline	Other biochar	7.87	0.01732	8.39	0.05196	14	14
	Alkaline	Other biochar	7.87	0.01732	8.51	0.06928	14	14
	Alkaline	Other biochar	7.94	0.12124	8.2	0.10392	14	14
	Alkaline	Other biochar	7.94	0.12124	8.23	0.03464	14	14
	Alkaline	Other biochar	7.94	0.12124	8.33	0.05196	14	14
	Alkaline	Other biochar	7.94	0.12124	8.5	0.06928	14	14
	Alkaline	Other biochar	7.95	0.13856	8.24	0.06928	14	14
	Alkaline	Other biochar	7.95	0.13856	8.27	0.10392	14	14
	Alkaline	Other biochar	7.95	0.13856	8.38	0.03464	14	14
	Alkaline	Other biochar	7.95	0.13856	8.47	0.01732	14	14

## Sheet: Biochar temperature
Num.	Soil pH	Biochar temperature	Control pH	Control SD	Experiment pH	Experiment SD	Sample size of control group	Sample size of experiment group
50	Acid	200-400	5.27	0.0866	5.71	0.38104	24	24
50	Acid	200-400	5.27	0.0866	6.01	0.32908	24	24
50	Acid	200-400	5.27	0.0866	6.12	0.12124	24	24
50	Acid	200-400	5.27	0.0866	6.25	0.01732	24	24
50	Acid	200-400	6.34	0.41568	6.79	0.12124	24	24
50	Acid	200-400	6.34	0.41568	6.97	0.57156	24	24
50	Acid	200-400	6.34	0.41568	6.99	0.41568	24	24
50	Acid	200-400	6.34	0.41568	7.23	0.2598	24	24
87	Acid	200-400	4.61	0.11	4.89	0.01	24	24
87	Acid	200-400	4.61	0.11	4.96	0.01	24	24
87	Acid	200-400	4.61	0.11	5.02	0.02	24	24
87	Acid	200-400	4.61	0.11	4.96	0.02	24	24
87	Acid	200-400	5.07	0.15	5.12	0.1	24	24
87	Acid	200-400	5.07	0.15	5.25	0.13	24	24
87	Acid	200-400	5.07	0.15	5.07	0.1	24	24
87	Acid	200-400	5.07	0.15	5.15	0.08	24	24
134	Acid	200-400	3.95	0.01732	4.3	0.01732	24	24
134	Acid	200-400	3.95	0.01732	4.35	0	24	24
134	Acid	200-400	3.95	0.01732	4.36	0	24	24
134	Acid	200-400	3.95	0.01732	4.4	0	24	24
136	Acid	200-400	4.08	0.408	4.35	0.435	24	24
136	Acid	200-400	4.08	0.408	4.55	0.435	24	24
559	Acid	200-400	4.55	0	4.67	0.01732	24	24
559	Acid	200-400	4.55	0	4.75	0.03464	24	24
66	Alkaline	200-400	8.01	0.01	8.07	0.04	22	22
66	Alkaline	200-400	8.01	0.01	8.09	0.05	22	22
91	Alkaline	200-400	8.28	0.05196	7.93	0.41568	22	22
91	Alkaline	200-400	8.28	0.05196	8.14	0.05196	22	22
91	Alkaline	200-400	8.28	0.05196	8.15	0.03464	22	22
146	Alkaline	200-400	8.08	0.808	7.88	0.788	22	22
146	Alkaline	200-400	8.08	0.808	7.86	0.786	22	22
146	Alkaline	200-400	8.08	0.808	7.85	0.785	22	22
146	Alkaline	200-400	8.08	0.808	8.05	0.805	22	22
146	Alkaline	200-400	8.08	0.808	7.99	0.799	22	22
489	Alkaline	200-400	7.87	0.01732	8.13	0.06928	22	22
489	Alkaline	200-400	7.87	0.01732	8.21	0.05196	22	22
489	Alkaline	200-400	7.87	0.01732	8.39	0.05196	22	22
489	Alkaline	200-400	7.87	0.01732	8.51	0.06928	22	22
489	Alkaline	200-400	7.94	0.12124	8.2	0.10392	22	22
489	Alkaline	200-400	7.94	0.12124	8.23	0.03464	22	22
489	Alkaline	200-400	7.94	0.12124	8.33	0.05196	22	22
489	Alkaline	200-400	7.94	0.12124	8.5	0.06928	22	22
489	Alkaline	200-400	7.95	0.13856	8.24	0.06928	22	22
489	Alkaline	200-400	7.95	0.13856	8.27	0.10392	22	22
489	Alkaline	200-400	7.95	0.13856	8.38	0.03464	22	22
489	Alkaline	200-400	7.95	0.13856	8.47	0.01732	22	22
13	Acid	400-600	6.4	0.13416	7.2	0.1118	282	282
13	Acid	400-600	6.4	0.13416	7.58	0.1118	282	282
13	Acid	400-600	6.4	0.13416	7.8	0.06708	282	282
13	Acid	400-600	6.4	0.13416	7.11	0.08944	282	282
13	Acid	400-600	6.4	0.13416	7.48	0.15652	282	282
13	Acid	400-600	6.4	0.13416	7.69	0.04472	282	282
13	Acid	400-600	6.4	0.13416	7.24	0.04472	282	282
13	Acid	400-600	6.4	0.13416	7.53	0.1118	282	282
13	Acid	400-600	6.4	0.13416	7.8	0.04472	282	282
16	Acid	400-600	4.46	0.09	5.1	0.35	282	282
16	Acid	400-600	4.46	0.09	5	0.01	282	282
16	Acid	400-600	4.41	0.04	4.53	0.39	282	282
16	Acid	400-600	4.41	0.04	4.73	0.19	282	282
16	Acid	400-600	4.63	0.01	4.69	0.23	282	282
16	Acid	400-600	4.63	0.01	4.67	0.17	282	282
16	Acid	400-600	4.59	0.2	4.66	0.36	282	282
17	Acid	400-600	6.56	0.056	6.71	0.06	282	282
17	Acid	400-600	6.56	0.056	6.87	0.05	282	282
22	Acid	400-600	5.07	0.507	5.07	0.507	282	282
22	Acid	400-600	5.07	0.507	5.29	0.529	282	282
22	Acid	400-600	5.07	0.507	5.14	0.514	282	282
22	Acid	400-600	4.95	0.495	5.13	0.272	282	282
22	Acid	400-600	4.95	0.495	6.81	0.238	282	282
22	Acid	400-600	4.95	0.495	7.69	0.265	282	282
24	Acid	400-600	5.69	0.08	5.93	0.04	282	282
24	Acid	400-600	5.69	0.08	6.38	0.1	282	282
24	Acid	400-600	5.75	0.08	5.92	0.11	282	282
24	Acid	400-600	5.75	0.08	6.35	0.07	282	282
24	Acid	400-600	5.98	0.2	6.31	0.55	282	282
24	Acid	400-600	5.98	0.2	6.45	0.15	282	282
24	Acid	400-600	5.89	0.2	6.1	0.22	282	282
24	Acid	400-600	5.89	0.2	6.4	0.06	282	282
34	Acid	400-600	3.77	0.01	3.88	0.03	282	282
34	Acid	400-600	5.17	0.03	5.32	0.02	282	282
34	Acid	400-600	4.52	0.04	4.83	0.01	282	282
34	Acid	400-600	3.85	0.01	3.96	0.01	282	282
34	Acid	400-600	3.81	0.02	4.05	0.01	282	282
37	Acid	400-600	5.3	0.03	5.42	0.07	282	282
37	Acid	400-600	5.3	0.03	5.61	0.11	282	282
48	Acid	400-600	4.76	0.07	4.8	0.04	282	282
48	Acid	400-600	4.76	0.07	5.05	0.08	282	282
48	Acid	400-600	4.81	0.02	4.83	0.06	282	282
48	Acid	400-600	4.81	0.02	5.92	0.05	282	282
52	Acid	400-600	5.54	0.24	6.12	0.04	282	282
52	Acid	400-600	5.49	0.2	6.03	0.17	282	282
52	Acid	400-600	5.37	0.14	5.72	0.06	282	282
52	Acid	400-600	5.42	0.02	5.69	0.27	282	282
52	Acid	400-600	5.23	0.09	5.71	0.11	282	282
53	Acid	400-600	6.51	0.0866	6.53	0.12124	282	282
53	Acid	400-600	6.51	0.0866	6.53	0.13856	282	282
53	Acid	400-600	6.51	0.0866	6.59	0.0866	282	282
53	Acid	400-600	6.51	0.0866	6.62	0.12124	282	282
54	Acid	400-600	5.71	0.571	6.62	0.662	282	282
56	Acid	400-600	4.61	0.1732	4.65	0.22516	282	282
56	Acid	400-600	4.61	0.1732	4.82	0.12124	282	282
56	Acid	400-600	4.61	0.1732	4.86	0.1732	282	282
56	Acid	400-600	4.61	0.1732	5.22	0.24248	282	282
60	Acid	400-600	5.46	0.546	6.69	0.669	282	282
60	Acid	400-600	5.17	0.517	6.64	0.664	282	282
60	Acid	400-600	4.97	0.497	6.27	0.627	282	282
76	Acid	400-600	4.63	0.463	5.32	0.532	282	282
76	Acid	400-600	5.04	0.504	5.9	0.59	282	282
76	Acid	400-600	5.32	0.532	6	0.6	282	282
76	Acid	400-600	4.84	0.484	5.45	0.545	282	282
76	Acid	400-600	5.13	0.513	5.91	0.591	282	282
76	Acid	400-600	6.08	0.608	6.08	0.608	282	282
79	Acid	400-600	5.4	0.3	6	0.2	282	282
79	Acid	400-600	5.4	0.2	6.6	0.1	282	282
79	Acid	400-600	5.3	0.2	6.2	0.4	282	282
79	Acid	400-600	5.2	0	5.7	0.5	282	282
79	Acid	400-600	5.2	0.2	6	0.4	282	282
79	Acid	400-600	5.5	0.6	5.8	0.3	282	282
86	Acid	400-600	3.9	0.02	4	0.05	282	282
87	Acid	400-600	4.61	0.11	4.94	0.02	282	282
87	Acid	400-600	4.61	0.11	4.98	0.03	282	282
87	Acid	400-600	4.61	0.11	5.2	0	282	282
87	Acid	400-600	4.61	0.11	4.72	0.05	282	282
87	Acid	400-600	5.07	0.15	5.37	0.13	282	282
87	Acid	400-600	5.07	0.15	5.25	0.01	282	282
87	Acid	400-600	5.07	0.15	5.35	0.21	282	282
87	Acid	400-600	5.07	0.15	5.27	0.18	282	282
96	Acid	400-600	4.3	0.02	5.11	0.04	282	282
96	Acid	400-600	4.3	0.02	5.3	0.11	282	282
105	Acid	400-600	4.48	0.04	6.03	0.04	282	282
105	Acid	400-600	4.56	0.04	6.17	0.02	282	282
115	Acid	400-600	5.67	0.22516	6.32	0.15588	282	282
115	Acid	400-600	6.02	0.06928	6.24	0.13856	282	282
115	Acid	400-600	6.32	0.12124	6.5	0	282	282
115	Acid	400-600	5.75	0.0866	6.06	0.0866	282	282
115	Acid	400-600	5.89	0.13856	6.11	0.13856	282	282
115	Acid	400-600	5.67	0.22516	6.24	0.22516	282	282
115	Acid	400-600	6.02	0.06928	6.5	0.06928	282	282
115	Acid	400-600	6.32	0.12124	6.5	0.06928	282	282
115	Acid	400-600	5.75	0.0866	6.06	0.0866	282	282
115	Acid	400-600	5.89	0.13856	6.32	0.31176	282	282
125	Acid	400-600	5.2	0	5.5	0	282	282
125	Acid	400-600	5.2	0	5.9	0	282	282
128	Acid	400-600	5.71	0.05196	5.96	0.03464	282	282
128	Acid	400-600	5.71	0.05196	6.17	0.0866	282	282
128	Acid	400-600	5.71	0.05196	6.33	0.03464	282	282
134	Acid	400-600	3.95	0.01732	4.6	0	282	282
134	Acid	400-600	3.95	0.01732	4.48	0.01732	282	282
134	Acid	400-600	3.95	0.01732	4.82	0.05196	282	282
134	Acid	400-600	3.95	0.01732	4.86	0.01732	282	282
140	Acid	400-600	5.7	0.01	5.78	0.02	282	282
140	Acid	400-600	5.7	0.01	6	0.05	282	282
140	Acid	400-600	5.7	0.01	6.15	0.05	282	282
208	Acid	400-600	4.31	0.01732	4.39	0.03464	282	282
208	Acid	400-600	4.31	0.01732	4.54	0.01732	282	282
208	Acid	400-600	4.31	0.01732	4.67	0.10392	282	282
208	Acid	400-600	4.29	0.03464	4.73	0.10392	282	282
208	Acid	400-600	4.29	0.03464	4.4	0.1732	282	282
208	Acid	400-600	4.29	0.03464	4.51	0.05196	282	282
209	Acid	400-600	3.47	0.347	4.75	0.475	282	282
209	Acid	400-600	3.47	0.347	3.74	0.374	282	282
209	Acid	400-600	3.47	0.347	4	0.4	282	282
209	Acid	400-600	3.47	0.347	4.41	0.441	282	282
209	Acid	400-600	3.47	0.347	3.71	0.371	282	282
209	Acid	400-600	3.69	0.369	4.71	0.471	282	282
211	Acid	400-600	4.74	0.11	5.88	0.15	282	282
211	Acid	400-600	4.74	0.11	6.56	0.25	282	282
211	Acid	400-600	4.74	0.11	4.82	0.19	282	282
211	Acid	400-600	4.74	0.11	4.97	0.05	282	282
226	Acid	400-600	5.63	0.563	5.84	0.584	282	282
226	Acid	400-600	5.63	0.563	5.93	0.593	282	282
226	Acid	400-600	5.38	0.538	5.49	0.549	282	282
226	Acid	400-600	5.38	0.538	5.79	0.579	282	282
229	Acid	400-600	5.95	0.1	6.88	0.1	282	282
233	Acid	400-600	5.83	0.583	6.36	0.636	282	282
233	Acid	400-600	5.83	0.583	6.65	0.665	282	282
235	Acid	400-600	4.5	0.16	4.92	0.16	282	282
263	Acid	400-600	4.8	0.13856	4.97	0.10392	282	282
263	Acid	400-600	4.8	0.13856	4.97	0.24248	282	282
263	Acid	400-600	4.8	0.13856	5.12	0.31176	282	282
263	Acid	400-600	4.8	0.13856	5.04	0.19052	282	282
263	Acid	400-600	4.8	0.13856	5.21	0.29444	282	282
263	Acid	400-600	4.8	0.13856	5.23	0.10392	282	282
263	Acid	400-600	4.81	0.06928	4.81	0.20784	282	282
263	Acid	400-600	4.81	0.06928	4.87	0.19052	282	282
263	Acid	400-600	4.81	0.06928	4.91	0.12124	282	282
263	Acid	400-600	4.81	0.06928	4.87	0.15588	282	282
263	Acid	400-600	4.81	0.06928	5.13	0.24248	282	282
265	Acid	400-600	4.79	0.09	4.84	0.07	282	282
265	Acid	400-600	4.79	0.09	4.88	0.07	282	282
265	Acid	400-600	4.79	0.09	5.02	0.08	282	282
265	Acid	400-600	4.79	0.09	5.19	0.07	282	282
265	Acid	400-600	4.79	0.09	5.21	0.05	282	282
265	Acid	400-600	4.79	0.09	5.32	0.04	282	282
265	Acid	400-600	4.65	0.08	4.76	0.05	282	282
265	Acid	400-600	4.65	0.08	4.88	0.08	282	282
265	Acid	400-600	4.65	0.08	4.8	0.08	282	282
265	Acid	400-600	4.65	0.08	4.91	0.06	282	282
265	Acid	400-600	4.65	0.08	5.04	0.06	282	282
265	Acid	400-600	4.65	0.08	5.04	0.08	282	282
265	Acid	400-600	4.63	0.05	4.75	0.08	282	282
265	Acid	400-600	4.63	0.05	4.73	0.07	282	282
265	Acid	400-600	4.63	0.05	4.8	0.07	282	282
265	Acid	400-600	4.63	0.05	4.88	0.05	282	282
265	Acid	400-600	4.63	0.05	4.81	0.07	282	282
265	Acid	400-600	4.63	0.05	5.02	0.04	282	282
265	Acid	400-600	4.57	0.07	4.6	0.06	282	282
265	Acid	400-600	4.57	0.07	4.76	0.07	282	282
265	Acid	400-600	4.57	0.07	4.73	0.07	282	282
265	Acid	400-600	4.57	0.07	4.79	0.04	282	282
265	Acid	400-600	4.57	0.07	4.8	0.07	282	282
265	Acid	400-600	4.57	0.07	4.75	0.05	282	282
265	Acid	400-600	4.34	0.04	4.36	0.07	282	282
265	Acid	400-600	4.34	0.04	4.36	0.05	282	282
265	Acid	400-600	4.34	0.04	4.58	0.06	282	282
265	Acid	400-600	4.34	0.04	4.52	0.04	282	282
265	Acid	400-600	4.34	0.04	4.65	0.04	282	282
265	Acid	400-600	4.34	0.04	4.66	0.05	282	282
283	Acid	400-600	6.07	0.12	6.07	0.12	282	282
283	Acid	400-600	6.07	0.12	6.19	0.08	282	282
283	Acid	400-600	5.66	0.04	6.09	0.08	282	282
283	Acid	400-600	5.66	0.04	6.21	0.12	282	282
324	Acid	400-600	5.36	0.05	5.59	0.02	282	282
324	Acid	400-600	5.36	0.05	5.63	0.05	282	282
324	Acid	400-600	5.36	0.05	5.69	0.06	282	282
324	Acid	400-600	5.36	0.05	5.74	0.03	282	282
326	Acid	400-600	5.93	0.6062	6.11	0.15588	282	282
326	Acid	400-600	5.93	0.6062	6.46	0.03464	282	282
332	Acid	400-600	4.88	0.05	4.99	0.13	282	282
332	Acid	400-600	4.88	0.05	5.12	0.01	282	282
332	Acid	400-600	6.01	0.06	6.15	0.02	282	282
332	Acid	400-600	6.01	0.06	6.29	0.15	282	282
332	Acid	400-600	5.54	0.23	5.89	0.05	282	282
332	Acid	400-600	5.54	0.23	6.26	0.17	282	282
333	Acid	400-600	6.09	0.06	6.14	0.07	282	282
333	Acid	400-600	6.09	0.06	6.65	0.05	282	282
342	Acid	400-600	5.51	0.05196	6.23	0.15588	282	282
342	Acid	400-600	5.42	0.06928	6.5	0.05196	282	282
342	Acid	400-600	5.32	0.29444	6.26	0.0866	282	282
366	Acid	400-600	5.9	0.28	7.58	0.39	282	282
392	Acid	400-600	4.77	0.477	4.81	0.481	282	282
392	Acid	400-600	4.77	0.477	5.05	0.505	282	282
392	Acid	400-600	4.6	0.46	4.77	0.477	282	282
392	Acid	400-600	4.6	0.46	6.18	0.618	282	282
392	Acid	400-600	4.39	0.439	4.53	0.453	282	282
392	Acid	400-600	4.39	0.439	6.45	0.645	282	282
392	Acid	400-600	4.7	0.47	5.05	0.505	282	282
392	Acid	400-600	4.7	0.47	7.28	0.728	282	282
392	Acid	400-600	4.12	0.412	4.6	0.46	282	282
392	Acid	400-600	4.12	0.412	7.18	0.718	282	282
392	Acid	400-600	4.81	0.481	4.84	0.484	282	282
392	Acid	400-600	4.81	0.481	5.94	0.594	282	282
392	Acid	400-600	5.08	0.508	5.22	0.522	282	282
392	Acid	400-600	5.08	0.508	6.76	0.676	282	282
392	Acid	400-600	4.91	0.491	6.56	0.656	282	282
392	Acid	400-600	4.81	0.481	5.12	0.512	282	282
392	Acid	400-600	4.81	0.481	7.31	0.731	282	282
392	Acid	400-600	3.78	0.378	4.53	0.453	282	282
392	Acid	400-600	3.78	0.378	7.07	0.707	282	282
393	Acid	400-600	4.09	0.1732	4.43	0.19052	282	282
396	Acid	400-600	5.21	0.14	6.78	0.16	282	282
396	Acid	400-600	5.21	0.14	6.41	0.15	282	282
425	Acid	400-600	4.45	0.03464	4.56	0.10392	282	282
425	Acid	400-600	4.45	0.03464	4.65	0.0866	282	282
425	Acid	400-600	4.45	0.03464	4.78	0.10392	282	282
438	Acid	400-600	4.94	0.19052	5.36	0.03464	282	282
438	Acid	400-600	4.94	0.19052	5.52	0.15588	282	282
438	Acid	400-600	4.96	0.10392	5.26	0.10392	282	282
438	Acid	400-600	4.96	0.10392	5.29	0.10392	282	282
448	Acid	400-600	5.41	0.05196	5.49	0.03464	282	282
448	Acid	400-600	5.41	0.05196	5.7	0.10392	282	282
448	Acid	400-600	5.41	0.05196	6.32	0.03464	282	282
468	Acid	400-600	5.49	0.02	5.54	0.06	282	282
468	Acid	400-600	5.49	0.02	5.84	0.18	282	282
468	Acid	400-600	5.67	0.06	5.75	0.04	282	282
468	Acid	400-600	5.67	0.06	5.9	0.18	282	282
468	Acid	400-600	6.3	0.1	6.55	0.12	282	282
473	Acid	400-600	7.05	0.05	7.08	0.07	282	282
473	Acid	400-600	7.05	0.05	7.15	0.03	282	282
473	Acid	400-600	7.06	0.02	7.06	0.01	282	282
473	Acid	400-600	7.06	0.02	7.13	0.03	282	282
473	Acid	400-600	5.77	0.01	5.83	0.06	282	282
473	Acid	400-600	5.77	0.01	5.86	0.01	282	282
473	Acid	400-600	5.68	0.02	5.76	0.04	282	282
473	Acid	400-600	5.68	0.02	5.85	0.01	282	282
474	Acid	400-600	6.12	0.612	6.43	0.643	282	282
474	Acid	400-600	6.12	0.612	6.38	0.638	282	282
474	Acid	400-600	6.12	0.612	6.35	0.635	282	282
474	Acid	400-600	6.11	0.611	6.62	0.662	282	282
474	Acid	400-600	6.11	0.611	6.55	0.655	282	282
474	Acid	400-600	6.11	0.611	6.6	0.66	282	282
474	Acid	400-600	6.17	0.617	6.56	0.656	282	282
474	Acid	400-600	6.17	0.617	6.6	0.66	282	282
474	Acid	400-600	6.17	0.617	6.61	0.661	282	282
482	Acid	400-600	6.03	0.06928	6.2	0.10392	282	282
482	Acid	400-600	6.03	0.06928	6.35	0.10392	282	282
482	Acid	400-600	6.03	0.06928	7.02	0.13856	282	282
482	Acid	400-600	6.01	0.0866	6.19	0.03464	282	282
482	Acid	400-600	6.01	0.0866	6.34	0.05196	282	282
482	Acid	400-600	6.01	0.0866	6.73	0.22516	282	282
509	Acid	400-600	5.99	0.10392	6.07	0.05196	282	282
509	Acid	400-600	5.99	0.10392	6.22	0.06928	282	282
509	Acid	400-600	5.99	0.10392	6.66	0.10392	282	282
509	Acid	400-600	5.69	0.13856	5.94	0.06928	282	282
509	Acid	400-600	5.69	0.13856	6.3	0.06928	282	282
509	Acid	400-600	5.69	0.13856	6.7	0.05196	282	282
523	Acid	400-600	6.88	0.14	7.58	0.02	282	282
559	Acid	400-600	4.55	0	4.92	0.29444	282	282
559	Acid	400-600	4.55	0	4.7	0.06928	282	282
565	Acid	400-600	5.68	0.03464	5.79	0.06928	282	282
565	Acid	400-600	5.68	0.03464	5.79	0.06928	282	282
565	Acid	400-600	5.71	0.03464	5.79	0.03464	282	282
565	Acid	400-600	5.71	0.03464	5.83	0.01732	282	282
577	Acid	400-600	6.07	0	6.43	0	282	282
577	Acid	400-600	6.07	0	6.49	0.15588	282	282
577	Acid	400-600	6.27	0.05196	6.39	0.06928	282	282
577	Acid	400-600	6.27	0.05196	6.78	0	282	282
577	Acid	400-600	6.78	0.05196	6.33	0.05196	282	282
577	Acid	400-600	6.78	0.05196	7.04	0.06928	282	282
577	Acid	400-600	5.98	0.15588	6.01	0.3464	282	282
577	Acid	400-600	5.69	0.15588	5.98	0.10392	282	282
577	Acid	400-600	5.69	0.15588	5.98	0.05196	282	282
577	Acid	400-600	6.53	0.05196	6.82	0.10392	282	282
577	Acid	400-600	6.53	0.05196	7.26	0.06928	282	282
577	Acid	400-600	6.59	0.05196	6.69	0.05196	282	282
577	Acid	400-600	6.59	0.05196	6.66	0.05196	282	282
577	Acid	400-600	6.3	0.06928	6.75	0.05196	282	282
577	Acid	400-600	6.3	0.06928	6.5	0.05196	282	282
68	Neutral	400-600	6.53	0.11	6.75	0.08	27	27
68	Neutral	400-600	6.53	0.11	6.77	0.18	27	27
68	Neutral	400-600	6.53	0.11	6.77	0.12	27	27
68	Neutral	400-600	6.53	0.04	6.73	0.21	27	27
68	Neutral	400-600	6.53	0.04	6.77	0.05	27	27
68	Neutral	400-600	6.53	0.04	6.89	0.11	27	27
111	Neutral	400-600	6.67	0.03	6.74	0.03	27	27
111	Neutral	400-600	6.64	0.01	6.71	0.05	27	27
111	Neutral	400-600	6.62	0.03	6.69	0.02	27	27
111	Neutral	400-600	6.71	0.04	6.76	0.02	27	27
111	Neutral	400-600	6.72	0.01	6.75	0.04	27	27
111	Neutral	400-600	6.72	0.02	6.75	0.01	27	27
301	Neutral	400-600	6.69	0.13856	7.08	0.06928	27	27
301	Neutral	400-600	6.69	0.13856	7.14	0.06928	27	27
301	Neutral	400-600	6.69	0.13856	7.17	0.10392	27	27
445	Neutral	400-600	6.38	0.638	6.56	0.656	27	27
445	Neutral	400-600	6.38	0.638	7.12	0.712	27	27
445	Neutral	400-600	6.38	0.638	7.72	0.772	27	27
494	Neutral	400-600	6.84	0.06928	6.89	0.0866	27	27
494	Neutral	400-600	6.84	0.06928	6.98	0.05196	27	27
494	Neutral	400-600	6.84	0.06928	6.97	0.01732	27	27
494	Neutral	400-600	6.96	0.06928	7	0.10392	27	27
494	Neutral	400-600	6.96	0.06928	7.05	0.03464	27	27
494	Neutral	400-600	6.96	0.06928	7.1	0.06928	27	27
508	Neutral	400-600	6.38	0.638	6.56	0.656	27	27
508	Neutral	400-600	6.38	0.638	7.12	0.712	27	27
508	Neutral	400-600	6.38	0.638	7.72	0.772	27	27
32	Alkaline	400-600	7.87	0.11	7.91	0.07	102	102
32	Alkaline	400-600	7.87	0.11	7.79	0.18	102	102
32	Alkaline	400-600	8.01	0.08	8.15	0.18	102	102
32	Alkaline	400-600	8.01	0.08	7.99	0.08	102	102
36	Alkaline	400-600	7.72	0.03464	7.73	0.03464	102	102
36	Alkaline	400-600	7.72	0.03464	7.76	0.05196	102	102
36	Alkaline	400-600	7.72	0.03464	7.79	0.05196	102	102
36	Alkaline	400-600	7.72	0.03464	7.83	0.05196	102	102
48	Alkaline	400-600	8.43	0.03	8.39	0.03	102	102
48	Alkaline	400-600	8.43	0.03	8.43	0.01	102	102
48	Alkaline	400-600	8.2	0.02	8.23	0.05	102	102
48	Alkaline	400-600	8.2	0.02	8.16	0.03	102	102
61	Alkaline	400-600	8.06	0.05	8.15	0.05	102	102
61	Alkaline	400-600	8.06	0.05	8.17	0.07	102	102
61	Alkaline	400-600	8.06	0.05	8.18	0.03	102	102
128	Alkaline	400-600	8	0.03464	8.07	0.03464	102	102
128	Alkaline	400-600	8	0.03464	8.11	0.06928	102	102
128	Alkaline	400-600	8	0.03464	8.13	0.03464	102	102
162	Alkaline	400-600	8.44	0.844	8.65	0.865	102	102
162	Alkaline	400-600	8.44	0.844	8.68	0.868	102	102
162	Alkaline	400-600	8.44	0.844	8.7	0.87	102	102
162	Alkaline	400-600	8.41	0.841	8.54	0.854	102	102
162	Alkaline	400-600	8.41	0.841	8.56	0.856	102	102
162	Alkaline	400-600	8.41	0.841	8.56	0.856	102	102
162	Alkaline	400-600	8.31	0.831	8.4	0.84	102	102
162	Alkaline	400-600	8.31	0.831	8.43	0.843	102	102
162	Alkaline	400-600	8.31	0.831	8.45	0.845	102	102
162	Alkaline	400-600	8.46	0.846	8.69	0.869	102	102
162	Alkaline	400-600	8.46	0.846	8.71	0.871	102	102
162	Alkaline	400-600	8.46	0.846	8.73	0.873	102	102
162	Alkaline	400-600	8.42	0.842	8.55	0.855	102	102
162	Alkaline	400-600	8.42	0.842	8.56	0.856	102	102
162	Alkaline	400-600	8.42	0.842	8.58	0.858	102	102
162	Alkaline	400-600	8.33	0.833	8.42	0.842	102	102
162	Alkaline	400-600	8.33	0.833	8.44	0.844	102	102
162	Alkaline	400-600	8.33	0.833	8.46	0.846	102	102
175	Alkaline	400-600	8.25	0.06	8.18	0.03	102	102
175	Alkaline	400-600	8.25	0.06	8.11	0.04	102	102
175	Alkaline	400-600	8.25	0.06	7.99	0.01	102	102
240	Alkaline	400-600	7.08	0.2598	7.23	0.3464	102	102
240	Alkaline	400-600	7.08	0.2598	7.22	0.2598	102	102
240	Alkaline	400-600	7.08	0.2598	7.41	0.48496	102	102
240	Alkaline	400-600	7.66	0.2598	7.7	0.2598	102	102
240	Alkaline	400-600	7.66	0.2598	7.81	0.39836	102	102
240	Alkaline	400-600	7.66	0.2598	7.94	0.79672	102	102
241	Alkaline	400-600	8.63	0.06928	8.89	0.03464	102	102
303	Alkaline	400-600	8.03	0.803	8.36	0.836	102	102
303	Alkaline	400-600	8.3	0.83	8.24	0.824	102	102
303	Alkaline	400-600	8.23	0.823	8.39	0.839	102	102
303	Alkaline	400-600	8.3	0.83	8.24	0.824	102	102
342	Alkaline	400-600	8.73	0.03464	8.78	0.15588	102	102
342	Alkaline	400-600	8.75	0.36372	8.68	0.10392	102	102
342	Alkaline	400-600	8.36	0.2598	8.52	0.3464	102	102
400	Alkaline	400-600	8.46	0.01	8.47	0.04	102	102
400	Alkaline	400-600	8.42	0.01	8.41	0.03	102	102
400	Alkaline	400-600	8.39	0.02	8.37	0.02	102	102
400	Alkaline	400-600	8.37	0	8.38	0.04	102	102
402	Alkaline	400-600	8.16	0.01	8.16	0.06	102	102
402	Alkaline	400-600	8.16	0.01	8.19	0.06	102	102
402	Alkaline	400-600	8.16	0.01	8.15	0	102	102
402	Alkaline	400-600	8.39	0.02	8.43	0.08	102	102
402	Alkaline	400-600	8.39	0.02	8.44	0.03	102	102
402	Alkaline	400-600	8.39	0.02	8.37	0.02	102	102
441	Alkaline	400-600	8.4	0.01732	8.32	0.01732	102	102
441	Alkaline	400-600	8.38	0.01732	8.32	0.01732	102	102
442	Alkaline	400-600	8.25	0.06	8.23	0.04	102	102
442	Alkaline	400-600	8.25	0.06	8.18	0.04	102	102
442	Alkaline	400-600	8.25	0.06	8.01	0.06	102	102
462	Alkaline	400-600	8.21	0.02	8.32	0.02	102	102
462	Alkaline	400-600	8.21	0.02	8.35	0.04	102	102
462	Alkaline	400-600	8.21	0.02	8.35	0.02	102	102
462	Alkaline	400-600	8.21	0.02	8.37	0.04	102	102
462	Alkaline	400-600	8.22	0.03	8.18	8.2	102	102
462	Alkaline	400-600	8.22	0.03	8.23	0.04	102	102
462	Alkaline	400-600	8.22	0.03	8.21	8.25	102	102
462	Alkaline	400-600	8.22	0.03	8.19	8.21	102	102
462	Alkaline	400-600	8.04	0.03	8.1	0.07	102	102
462	Alkaline	400-600	8.04	0.03	8.08	0.07	102	102
462	Alkaline	400-600	8.04	0.03	8.05	0.01	102	102
462	Alkaline	400-600	8.04	0.03	8.05	0.07	102	102
463	Alkaline	400-600	7.66	0.20784	7.7	0.13856	102	102
463	Alkaline	400-600	7.66	0.20784	7.81	0.20784	102	102
463	Alkaline	400-600	7.66	0.20784	7.93	0.793	102	102
501	Alkaline	400-600	8.19	0.12124	8.3	0.10392	102	102
501	Alkaline	400-600	8.19	0.12124	8.26	0.01732	102	102
501	Alkaline	400-600	8.19	0.12124	8.33	0.06928	102	102
501	Alkaline	400-600	8.1	0.06928	8.08	0.0866	102	102
501	Alkaline	400-600	8.1	0.06928	8.1	0.10392	102	102
501	Alkaline	400-600	8.1	0.06928	8.15	0.03464	102	102
501	Alkaline	400-600	8.02	0.24248	8.2	0.29444	102	102
501	Alkaline	400-600	8.02	0.24248	8.21	0.2598	102	102
501	Alkaline	400-600	8.02	0.24248	8.27	0.12124	102	102
501	Alkaline	400-600	8.27	0.06928	8.24	0.06928	102	102
501	Alkaline	400-600	8.27	0.06928	8.31	0.29444	102	102
501	Alkaline	400-600	8.27	0.06928	8.35	0.20784	102	102
501	Alkaline	400-600	8.37	0.06928	8.42	0.06928	102	102
501	Alkaline	400-600	8.37	0.06928	8.49	0.0866	102	102
501	Alkaline	400-600	8.37	0.06928	8.49	0.12124	102	102
565	Alkaline	400-600	7.88	0.01732	8.19	0	102	102
565	Alkaline	400-600	7.88	0.01732	8.3	0	102	102
565	Alkaline	400-600	8.08	0.01732	8.23	0.01732	102	102
565	Alkaline	400-600	8.08	0.01732	8.42	0.01732	102	102
87	Acid	600-800	4.61	0.11	4.89	0.04	71	71
87	Acid	600-800	5.07	0.15	5.44	0.07	71	71
87	Acid	600-800	5.07	0.15	5.11	0.03	71	71
87	Acid	600-800	4.3	0.02	4.74	0.06	71	71
96	Acid	600-800	4.3	0.02	5.2	0.01	71	71
96	Acid	600-800	3.95	0.01732	5.17	0.03464	71	71
134	Acid	600-800	3.95	0.01732	4.8	0.01732	71	71
134	Acid	600-800	3.95	0.01732	5.2	0.01732	71	71
134	Acid	600-800	3.95	0.01732	5.22	0.01732	71	71
134	Acid	600-800	5.01	0.501	5.23	0.523	71	71
155	Acid	600-800	5.09	0.509	5.11	0.511	71	71
155	Acid	600-800	5.04	0.504	5.16	0.516	71	71
155	Acid	600-800	6.42	0.05	6.68	0.12	71	71
219	Acid	600-800	6.01	0.033	6.16	0.066	71	71
231	Acid	600-800	6.01	0.033	6.19	0.063	71	71
231	Acid	600-800	5.06	0.038	5.13	0.068	71	71
231	Acid	600-800	5.06	0.038	5.16	0.097	71	71
231	Acid	600-800	5.75	0.02	5.82	0.03	71	71
276	Acid	600-800	5.75	0.02	5.89	0.02	71	71
276	Acid	600-800	5.11	0.06928	5.15	0	71	71
353	Acid	600-800	5.11	0.06928	5.31	0	71	71
353	Acid	600-800	5.06	0.506	5.15	0.515	71	71
353	Acid	600-800	5.06	0.506	5.1	0.51	71	71
353	Acid	600-800	5.21	0.14	6.82	0.18	71	71
396	Acid	600-800	6.19	0.01	6.25	0.07	71	71
413	Acid	600-800	6.19	0.01	6.3	0.06	71	71
413	Acid	600-800	6.19	0.01	6.47	0.03	71	71
413	Acid	600-800	6.19	0.01	6.8	0.05	71	71
413	Acid	600-800	6.19	0.02	6.48	0.02	71	71
413	Acid	600-800	6.19	0.02	6.69	0.09	71	71
413	Acid	600-800	6.19	0.02	6.98	0.01	71	71
413	Acid	600-800	6.19	0.02	7.8	0.04	71	71
413	Acid	600-800	6.31	0.06	6.31	0.06	71	71
413	Acid	600-800	6.31	0.06	6.32	0.06	71	71
413	Acid	600-800	6.31	0.06	6.38	0.02	71	71
413	Acid	600-800	6.31	0.06	6.55	0.06	71	71
413	Acid	600-800	6.19	0.11	6.36	0.03	71	71
413	Acid	600-800	6.19	0.11	6.48	0.06	71	71
413	Acid	600-800	6.19	0.11	6.8	0.04	71	71
413	Acid	600-800	6.19	0.11	7.51	0.08	71	71
413	Acid	600-800	6.22	0.07	6.35	0.04	71	71
413	Acid	600-800	6.22	0.07	6.41	0.04	71	71
413	Acid	600-800	6.22	0.07	6.51	0.05	71	71
413	Acid	600-800	6.22	0.07	6.84	0.12	71	71
413	Acid	600-800	6.32	0.04	6.53	0.05	71	71
413	Acid	600-800	6.32	0.04	6.75	0.06	71	71
413	Acid	600-800	6.32	0.04	7.02	0.04	71	71
413	Acid	600-800	6.32	0.04	7.83	0.02	71	71
413	Acid	600-800	6.32	0.06	6.35	0.04	71	71
413	Acid	600-800	6.32	0.06	6.41	0.08	71	71
413	Acid	600-800	6.32	0.06	6.45	0.07	71	71
413	Acid	600-800	6.32	0.06	6.59	0.01	71	71
413	Acid	600-800	6.39	0.07	6.52	0.04	71	71
413	Acid	600-800	6.39	0.07	6.82	0.08	71	71
413	Acid	600-800	6.39	0.07	7.54	0.09	71	71
413	Acid	600-800	6.24	0.08	6.28	0.11	71	71
413	Acid	600-800	6.24	0.08	6.38	0.08	71	71
413	Acid	600-800	6.24	0.08	6.51	0.08	71	71
413	Acid	600-800	6.24	0.08	6.87	0.15	71	71
413	Acid	600-800	6.35	0.05	6.54	0.05	71	71
413	Acid	600-800	6.35	0.05	6.75	0.04	71	71
413	Acid	600-800	6.35	0.05	7.01	0.01	71	71
413	Acid	600-800	6.35	0.05	7.89	0.04	71	71
413	Acid	600-800	6.31	0.08	6.33	0.05	71	71
413	Acid	600-800	6.31	0.08	6.38	0.01	71	71
413	Acid	600-800	6.31	0.08	6.58	0.03	71	71
413	Acid	600-800	6.27	0.05	6.35	0.06	71	71
413	Acid	600-800	6.27	0.05	6.44	0.06	71	71
413	Acid	600-800	6.27	0.05	6.81	0.07	71	71
413	Acid	600-800	6.27	0.05	7.59	0.09	71	71
413	Acid	600-800	6.24	0.08	6.87	0.15	71	71
232	Neutral	600-800	7.17	0.717	7.35	0.735	17	17
232	Neutral	600-800	7.17	0.717	7.4	0.74	17	17
232	Neutral	600-800	7.17	0.717	7.43	0.743	17	17
232	Neutral	600-800	7.17	0.717	7.34	0.734	17	17
232	Neutral	600-800	7.17	0.717	7.55	0.755	17	17
232	Neutral	600-800	7.17	0.717	7.65	0.765	17	17
232	Neutral	600-800	7.17	0.717	7.63	0.763	17	17
232	Neutral	600-800	7.17	0.717	7.7	0.77	17	17
232	Neutral	600-800	7.17	0.717	7.79	0.779	17	17
370	Neutral	600-800	7.31	0.35	7.61	0.32	17	17
370	Neutral	600-800	7.31	0.35	7.81	0.15	17	17
370	Neutral	600-800	7.31	0.35	8.06	0.1	17	17
370	Neutral	600-800	7.31	0.35	8.18	0.15	17	17
370	Neutral	600-800	7.24	0.1	7.46	0.03	17	17
370	Neutral	600-800	7.24	0.1	7.51	0.23	17	17
370	Neutral	600-800	7.24	0.1	7.49	0.05	17	17
370	Neutral	600-800	7.24	0.1	8.03	0.1	17	17
394	Alkaline	600-800	7.99	0.05196	7.62	0.10392	7	7
394	Alkaline	600-800	8.02	0.06928	7.95	0.06928	7	7
419	Alkaline	600-800	8.2	0.82	8	0.8	7	7
419	Alkaline	600-800	8	0.8	7.8	0.78	7	7
456	Alkaline	600-800	8.85	0.885	8.76	0.876	7	7
456	Alkaline	600-800	8.85	0.885	8.81	0.881	7	7
456	Alkaline	600-800	8.85	0.885	8.91	0.891	7	7

## Sheet: Biochar application
Num.	Soil pH	Biochar application	Control pH	Control SD	Experiment pH	Experiment SD	Sample size of control group	Sample size of experiment group
16	Acid	＜1%	4.46	0.09	5.1	0.35	157	157
16	Acid	＜1%	4.46	0.09	5	0.01	157	157
16	Acid	＜1%	4.41	0.04	4.53	0.39	157	157
16	Acid	＜1%	4.41	0.04	4.73	0.19	157	157
16	Acid	＜1%	4.63	0.01	4.69	0.23	157	157
16	Acid	＜1%	4.63	0.01	4.67	0.17	157	157
16	Acid	＜1%	4.59	0.2	4.66	0.36	157	157
17	Acid	＜1%	6.56	0.056	6.71	0.06	157	157
22	Acid	＜1%	5.07	0.507	5.07	0.507	157	157
22	Acid	＜1%	5.07	0.507	5.29	0.529	157	157
22	Acid	＜1%	5.07	0.507	5.14	0.514	157	157
22	Acid	＜1%	4.95	0.495	5.13	0.272	157	157
37	Acid	＜1%	5.3	0.03	5.42	0.07	157	157
48	Acid	＜1%	4.76	0.07	4.8	0.04	157	157
48	Acid	＜1%	4.76	0.07	5.05	0.08	157	157
48	Acid	＜1%	4.81	0.02	4.83	0.06	157	157
48	Acid	＜1%	4.81	0.02	5.92	0.05	157	157
50	Acid	＜1%	5.27	0.0866	5.71	0.38104	157	157
50	Acid	＜1%	5.27	0.0866	6.01	0.32908	157	157
50	Acid	＜1%	5.27	0.0866	6.12	0.12124	157	157
50	Acid	＜1%	6.34	0.41568	6.79	0.12124	157	157
50	Acid	＜1%	6.34	0.41568	6.97	0.57156	157	157
50	Acid	＜1%	6.34	0.41568	6.99	0.41568	157	157
53	Acid	＜1%	6.51	0.0866	6.53	0.12124	157	157
56	Acid	＜1%	4.61	0.1732	4.65	0.22516	157	157
56	Acid	＜1%	4.61	0.1732	4.82	0.12124	157	157
56	Acid	＜1%	4.61	0.1732	4.86	0.1732	157	157
56	Acid	＜1%	4.61	0.1732	5.22	0.24248	157	157
60	Acid	＜1%	5.46	0.546	6.69	0.669	157	157
60	Acid	＜1%	5.17	0.517	6.64	0.664	157	157
60	Acid	＜1%	4.97	0.497	6.27	0.627	157	157
79	Acid	＜1%	5.4	0.3	6	0.2	157	157
79	Acid	＜1%	5.4	0.2	6.6	0.1	157	157
79	Acid	＜1%	5.3	0.2	6.2	0.4	157	157
79	Acid	＜1%	5.2	0	5.7	0.5	157	157
79	Acid	＜1%	5.2	0.2	6	0.4	157	157
79	Acid	＜1%	5.5	0.6	5.8	0.3	157	157
86	Acid	＜1%	3.9	0.02	4	0.05	157	157
112	Acid	＜1%	4.4	0.1732	4.6	0.19052	157	157
112	Acid	＜1%	4.4	0.19052	4.69	0.1732	157	157
112	Acid	＜1%	4.2	0.1732	4.39	0.19052	157	157
112	Acid	＜1%	4.14	0.15588	4.32	0.1732	157	157
128	Acid	＜1%	5.71	0.05196	5.96	0.03464	157	157
140	Acid	＜1%	5.7	0.01	5.78	0.02	157	157
148	Acid	＜1%	6.64	0.02	6.67	0.03	157	157
148	Acid	＜1%	6.64	0.02	6.82	0.02	157	157
148	Acid	＜1%	6.64	0.02	6.94	0.02	157	157
148	Acid	＜1%	6.64	0.02	7.09	0.01	157	157
155	Acid	＜1%	5.01	0.501	5.23	0.523	157	157
155	Acid	＜1%	5.09	0.509	5.11	0.511	157	157
155	Acid	＜1%	5.04	0.504	5.16	0.516	157	157
161	Acid	＜1%	5.26	0.12124	5.43	0.19052	157	157
161	Acid	＜1%	5.26	0.12124	5.76	0.29444	157	157
161	Acid	＜1%	5.74	0.24248	5.97	0.06928	157	157
161	Acid	＜1%	5.74	0.24248	6.4	0.13856	157	157
209	Acid	＜1%	3.47	0.347	3.74	0.374	157	157
226	Acid	＜1%	5.63	0.563	5.84	0.584	157	157
226	Acid	＜1%	5.38	0.538	5.49	0.549	157	157
231	Acid	＜1%	6.01	0.033	6.16	0.066	157	157
231	Acid	＜1%	6.01	0.033	6.19	0.063	157	157
231	Acid	＜1%	5.06	0.038	5.13	0.068	157	157
231	Acid	＜1%	5.06	0.038	5.16	0.097	157	157
263	Acid	＜1%	4.8	0.13856	4.97	0.10392	157	157
263	Acid	＜1%	4.8	0.13856	4.97	0.24248	157	157
263	Acid	＜1%	4.8	0.13856	5.12	0.31176	157	157
263	Acid	＜1%	4.8	0.13856	5.04	0.19052	157	157
263	Acid	＜1%	4.81	0.06928	4.81	0.20784	157	157
263	Acid	＜1%	4.81	0.06928	4.87	0.19052	157	157
263	Acid	＜1%	4.81	0.06928	4.91	0.12124	157	157
265	Acid	＜1%	4.79	0.09	4.84	0.07	157	157
265	Acid	＜1%	4.79	0.09	4.88	0.07	157	157
265	Acid	＜1%	4.79	0.09	5.02	0.08	157	157
265	Acid	＜1%	4.79	0.09	5.19	0.07	157	157
265	Acid	＜1%	4.65	0.08	4.76	0.05	157	157
265	Acid	＜1%	4.65	0.08	4.88	0.08	157	157
265	Acid	＜1%	4.65	0.08	4.8	0.08	157	157
265	Acid	＜1%	4.65	0.08	4.91	0.06	157	157
265	Acid	＜1%	4.63	0.05	4.75	0.08	157	157
265	Acid	＜1%	4.63	0.05	4.73	0.07	157	157
265	Acid	＜1%	4.63	0.05	4.8	0.07	157	157
265	Acid	＜1%	4.63	0.05	4.88	0.05	157	157
265	Acid	＜1%	4.57	0.07	4.6	0.06	157	157
265	Acid	＜1%	4.57	0.07	4.76	0.07	157	157
265	Acid	＜1%	4.57	0.07	4.73	0.07	157	157
265	Acid	＜1%	4.57	0.07	4.79	0.04	157	157
265	Acid	＜1%	4.34	0.04	4.36	0.07	157	157
265	Acid	＜1%	4.34	0.04	4.36	0.05	157	157
265	Acid	＜1%	4.34	0.04	4.58	0.06	157	157
265	Acid	＜1%	4.34	0.04	4.52	0.04	157	157
276	Acid	＜1%	5.75	0.02	5.82	0.03	157	157
283	Acid	＜1%	6.07	0.12	6.07	0.12	157	157
283	Acid	＜1%	6.07	0.12	6.19	0.08	157	157
283	Acid	＜1%	5.66	0.04	6.09	0.08	157	157
283	Acid	＜1%	5.66	0.04	6.21	0.12	157	157
326	Acid	＜1%	5.93	0.6062	6.11	0.15588	157	157
332	Acid	＜1%	4.88	0.05	4.99	0.13	157	157
332	Acid	＜1%	6.01	0.06	6.15	0.02	157	157
332	Acid	＜1%	5.54	0.23	5.89	0.05	157	157
333	Acid	＜1%	6.09	0.06	6.14	0.07	157	157
342	Acid	＜1%	5.51	0.05196	6.23	0.15588	157	157
342	Acid	＜1%	5.42	0.06928	6.5	0.05196	157	157
342	Acid	＜1%	5.32	0.29444	6.26	0.0866	157	157
353	Acid	＜1%	5.11	0.06928	5.15	0	157	157
353	Acid	＜1%	5.06	0.506	5.15	0.515	157	157
392	Acid	＜1%	4.77	0.477	4.81	0.481	157	157
392	Acid	＜1%	4.77	0.477	5.05	0.505	157	157
392	Acid	＜1%	4.6	0.46	4.77	0.477	157	157
392	Acid	＜1%	4.6	0.46	6.18	0.618	157	157
392	Acid	＜1%	4.39	0.439	4.53	0.453	157	157
392	Acid	＜1%	4.39	0.439	6.45	0.645	157	157
392	Acid	＜1%	4.7	0.47	5.05	0.505	157	157
392	Acid	＜1%	4.7	0.47	7.28	0.728	157	157
392	Acid	＜1%	4.12	0.412	4.6	0.46	157	157
392	Acid	＜1%	4.12	0.412	7.18	0.718	157	157
392	Acid	＜1%	4.81	0.481	4.84	0.484	157	157
392	Acid	＜1%	4.81	0.481	5.94	0.594	157	157
392	Acid	＜1%	5.08	0.508	5.22	0.522	157	157
392	Acid	＜1%	5.08	0.508	6.76	0.676	157	157
392	Acid	＜1%	4.91	0.491	6.56	0.656	157	157
392	Acid	＜1%	4.81	0.481	5.12	0.512	157	157
392	Acid	＜1%	4.81	0.481	7.31	0.731	157	157
392	Acid	＜1%	3.78	0.378	4.53	0.453	157	157
392	Acid	＜1%	3.78	0.378	7.07	0.707	157	157
393	Acid	＜1%	4.09	0.1732	4.43	0.19052	157	157
413	Acid	＜1%	6.19	0.01	6.25	0.07	157	157
413	Acid	＜1%	6.19	0.02	6.48	0.02	157	157
413	Acid	＜1%	6.31	0.06	6.31	0.06	157	157
413	Acid	＜1%	6.19	0.11	6.36	0.03	157	157
413	Acid	＜1%	6.22	0.07	6.35	0.04	157	157
413	Acid	＜1%	6.32	0.04	6.53	0.05	157	157
413	Acid	＜1%	6.32	0.06	6.35	0.04	157	157
413	Acid	＜1%	6.24	0.08	6.28	0.11	157	157
413	Acid	＜1%	6.35	0.05	6.54	0.05	157	157
413	Acid	＜1%	6.27	0.05	6.35	0.06	157	157
425	Acid	＜1%	4.45	0.03464	4.56	0.10392	157	157
425	Acid	＜1%	4.45	0.03464	4.65	0.0866	157	157
425	Acid	＜1%	4.45	0.03464	4.78	0.10392	157	157
448	Acid	＜1%	5.41	0.05196	5.49	0.03464	157	157
468	Acid	＜1%	5.49	0.02	5.54	0.06	157	157
468	Acid	＜1%	5.67	0.06	5.75	0.04	157	157
473	Acid	＜1%	7.05	0.05	7.08	0.07	157	157
473	Acid	＜1%	7.06	0.02	7.06	0.01	157	157
473	Acid	＜1%	5.77	0.01	5.83	0.06	157	157
473	Acid	＜1%	5.68	0.02	5.76	0.04	157	157
474	Acid	＜1%	6.12	0.612	6.43	0.643	157	157
474	Acid	＜1%	6.12	0.612	6.38	0.638	157	157
474	Acid	＜1%	6.12	0.612	6.35	0.635	157	157
474	Acid	＜1%	6.11	0.611	6.62	0.662	157	157
474	Acid	＜1%	6.11	0.611	6.55	0.655	157	157
474	Acid	＜1%	6.11	0.611	6.6	0.66	157	157
474	Acid	＜1%	6.17	0.617	6.56	0.656	157	157
474	Acid	＜1%	6.17	0.617	6.6	0.66	157	157
474	Acid	＜1%	6.17	0.617	6.61	0.661	157	157
482	Acid	＜1%	6.03	0.06928	6.2	0.10392	157	157
482	Acid	＜1%	6.03	0.06928	6.35	0.10392	157	157
482	Acid	＜1%	6.01	0.0866	6.19	0.03464	157	157
482	Acid	＜1%	6.01	0.0866	6.34	0.05196	157	157
68	Neutral	＜1%	6.53	0.11	6.75	0.08	13	13
68	Neutral	＜1%	6.53	0.11	6.77	0.18	13	13
68	Neutral	＜1%	6.53	0.04	6.73	0.21	13	13
68	Neutral	＜1%	6.53	0.04	6.77	0.05	13	13
232	Neutral	＜1%	7.17	0.717	7.35	0.735	13	13
232	Neutral	＜1%	7.17	0.717	7.34	0.734	13	13
232	Neutral	＜1%	7.17	0.717	7.63	0.763	13	13
445	Neutral	＜1%	6.38	0.638	6.56	0.656	13	13
494	Neutral	＜1%	6.84	0.06928	6.89	0.0866	13	13
494	Neutral	＜1%	6.84	0.06928	6.98	0.05196	13	13
494	Neutral	＜1%	6.96	0.06928	7	0.10392	13	13
494	Neutral	＜1%	6.96	0.06928	7.05	0.03464	13	13
508	Neutral	＜1%	6.38	0.638	6.56	0.656	13	13
32	Alkaline	＜1%	7.87	0.11	7.91	0.07	48	48
32	Alkaline	＜1%	8.01	0.08	8.15	0.18	48	48
36	Alkaline	＜1%	7.72	0.03464	7.73	0.03464	48	48
40	Alkaline	＜1%	8.47	0.04	8.33	0.08	48	48
40	Alkaline	＜1%	8.47	0.04	8.29	0.06	48	48
40	Alkaline	＜1%	8.47	0.04	8.27	0.05	48	48
40	Alkaline	＜1%	8.47	0.04	8.15	0.04	48	48
40	Alkaline	＜1%	8.47	0.04	8.35	0.04	48	48
40	Alkaline	＜1%	8.47	0.04	8.29	0.04	48	48
40	Alkaline	＜1%	8.47	0.04	8.28	0.04	48	48
40	Alkaline	＜1%	8.47	0.04	8.07	0.07	48	48
40	Alkaline	＜1%	8.35	0.1	8.11	0.06	48	48
40	Alkaline	＜1%	8.35	0.1	8.03	0.06	48	48
40	Alkaline	＜1%	8.35	0.1	7.87	0.1	48	48
40	Alkaline	＜1%	8.35	0.1	7.71	0.06	48	48
40	Alkaline	＜1%	8.29	0.06	8.17	0.06	48	48
40	Alkaline	＜1%	8.29	0.06	8.13	0.1	48	48
40	Alkaline	＜1%	8.29	0.06	8.13	0.02	48	48
40	Alkaline	＜1%	8.29	0.06	7.93	0.06	48	48
48	Alkaline	＜1%	8.43	0.03	8.39	0.03	48	48
48	Alkaline	＜1%	8.43	0.03	8.43	0.01	48	48
48	Alkaline	＜1%	8.2	0.02	8.23	0.05	48	48
48	Alkaline	＜1%	8.2	0.02	8.16	0.03	48	48
66	Alkaline	＜1%	8.01	0.01	8.07	0.04	48	48
66	Alkaline	＜1%	8.01	0.01	8.09	0.05	48	48
128	Alkaline	＜1%	8	0.03464	8.07	0.03464	48	48
146	Alkaline	＜1%	8.08	0.808	7.88	0.788	48	48
241	Alkaline	＜1%	8.63	0.06928	8.89	0.03464	48	48
319	Alkaline	＜1%	8.18	0.12124	8.4	0.20784	48	48
342	Alkaline	＜1%	8.73	0.03464	8.78	0.15588	48	48
342	Alkaline	＜1%	8.75	0.36372	8.68	0.10392	48	48
342	Alkaline	＜1%	8.36	0.2598	8.52	0.3464	48	48
394	Alkaline	＜1%	7.99	0.05196	7.62	0.10392	48	48
394	Alkaline	＜1%	8.02	0.06928	7.95	0.06928	48	48
402	Alkaline	＜1%	8.16	0.01	8.16	0.06	48	48
402	Alkaline	＜1%	8.16	0.01	8.19	0.06	48	48
402	Alkaline	＜1%	8.16	0.01	8.15	0	48	48
402	Alkaline	＜1%	8.39	0.02	8.43	0.08	48	48
402	Alkaline	＜1%	8.39	0.02	8.44	0.03	48	48
402	Alkaline	＜1%	8.39	0.02	8.37	0.02	48	48
419	Alkaline	＜1%	8.2	0.82	8	0.8	48	48
419	Alkaline	＜1%	8	0.8	7.8	0.78	48	48
456	Alkaline	＜1%	8.85	0.885	8.76	0.876	48	48
456	Alkaline	＜1%	8.85	0.885	8.81	0.881	48	48
462	Alkaline	＜1%	8.21	0.02	8.32	0.02	48	48
462	Alkaline	＜1%	8.21	0.02	8.35	0.04	48	48
462	Alkaline	＜1%	8.22	0.03	8.18	8.2	48	48
462	Alkaline	＜1%	8.22	0.03	8.23	0.04	48	48
462	Alkaline	＜1%	8.04	0.03	8.1	0.07	48	48
462	Alkaline	＜1%	8.04	0.03	8.08	0.07	48	48
489	Alkaline	＜1%	7.87	0.01732	8.13	0.06928	48	48
489	Alkaline	＜1%	7.94	0.12124	8.2	0.10392	48	48
489	Alkaline	＜1%	7.95	0.13856	8.24	0.06928	48	48
501	Alkaline	＜1%	8.19	0.12124	8.3	0.10392	48	48
501	Alkaline	＜1%	8.1	0.06928	8.08	0.0866	48	48
501	Alkaline	＜1%	8.02	0.24248	8.2	0.29444	48	48
501	Alkaline	＜1%	8.27	0.06928	8.24	0.06928	48	48
501	Alkaline	＜1%	8.37	0.06928	8.42	0.06928	48	48
13	Acid	1%-5%	6.4	0.13416	7.2	0.1118	192	192
13	Acid	1%-5%	6.4	0.13416	7.58	0.1118	192	192
13	Acid	1%-5%	6.4	0.13416	7.8	0.06708	192	192
13	Acid	1%-5%	6.4	0.13416	7.11	0.08944	192	192
13	Acid	1%-5%	6.4	0.13416	7.48	0.15652	192	192
13	Acid	1%-5%	6.4	0.13416	7.69	0.04472	192	192
13	Acid	1%-5%	6.4	0.13416	7.24	0.04472	192	192
13	Acid	1%-5%	6.4	0.13416	7.53	0.1118	192	192
13	Acid	1%-5%	6.4	0.13416	7.8	0.04472	192	192
17	Acid	1%-5%	6.56	0.056	6.87	0.05	192	192
22	Acid	1%-5%	4.95	0.495	6.81	0.238	192	192
24	Acid	1%-5%	5.69	0.08	5.93	0.04	192	192
24	Acid	1%-5%	5.69	0.08	6.38	0.1	192	192
24	Acid	1%-5%	5.75	0.08	5.92	0.11	192	192
24	Acid	1%-5%	5.75	0.08	6.35	0.07	192	192
24	Acid	1%-5%	5.98	0.2	6.31	0.55	192	192
24	Acid	1%-5%	5.98	0.2	6.45	0.15	192	192
24	Acid	1%-5%	5.89	0.2	6.1	0.22	192	192
24	Acid	1%-5%	5.89	0.2	6.4	0.06	192	192
34	Acid	1%-5%	3.77	0.01	3.88	0.03	192	192
34	Acid	1%-5%	5.17	0.03	5.32	0.02	192	192
34	Acid	1%-5%	4.52	0.04	4.83	0.01	192	192
34	Acid	1%-5%	3.85	0.01	3.96	0.01	192	192
34	Acid	1%-5%	3.81	0.02	4.05	0.01	192	192
37	Acid	1%-5%	5.3	0.03	5.61	0.11	192	192
50	Acid	1%-5%	5.27	0.0866	6.25	0.01732	192	192
50	Acid	1%-5%	6.34	0.41568	7.23	0.2598	192	192
52	Acid	1%-5%	5.54	0.24	6.12	0.04	192	192
52	Acid	1%-5%	5.49	0.2	6.03	0.17	192	192
52	Acid	1%-5%	5.37	0.14	5.72	0.06	192	192
52	Acid	1%-5%	5.42	0.02	5.69	0.27	192	192
52	Acid	1%-5%	5.23	0.09	5.71	0.11	192	192
53	Acid	1%-5%	6.51	0.0866	6.53	0.13856	192	192
53	Acid	1%-5%	6.51	0.0866	6.59	0.0866	192	192
53	Acid	1%-5%	6.51	0.0866	6.62	0.12124	192	192
54	Acid	1%-5%	5.71	0.571	6.62	0.662	192	192
76	Acid	1%-5%	4.63	0.463	5.32	0.532	192	192
76	Acid	1%-5%	5.04	0.504	5.9	0.59	192	192
76	Acid	1%-5%	5.32	0.532	6	0.6	192	192
76	Acid	1%-5%	4.84	0.484	5.45	0.545	192	192
76	Acid	1%-5%	5.13	0.513	5.91	0.591	192	192
76	Acid	1%-5%	6.08	0.608	6.08	0.608	192	192
87	Acid	1%-5%	4.61	0.11	4.89	0.01	192	192
87	Acid	1%-5%	4.61	0.11	4.96	0.01	192	192
87	Acid	1%-5%	4.61	0.11	4.94	0.02	192	192
87	Acid	1%-5%	4.61	0.11	4.98	0.03	192	192
87	Acid	1%-5%	4.61	0.11	4.89	0.04	192	192
87	Acid	1%-5%	4.61	0.11	5.02	0.02	192	192
87	Acid	1%-5%	4.61	0.11	4.96	0.02	192	192
87	Acid	1%-5%	4.61	0.11	5.2	0	192	192
87	Acid	1%-5%	4.61	0.11	4.72	0.05	192	192
87	Acid	1%-5%	5.07	0.15	5.12	0.1	192	192
87	Acid	1%-5%	5.07	0.15	5.25	0.13	192	192
87	Acid	1%-5%	5.07	0.15	5.37	0.13	192	192
87	Acid	1%-5%	5.07	0.15	5.25	0.01	192	192
87	Acid	1%-5%	5.07	0.15	5.44	0.07	192	192
87	Acid	1%-5%	5.07	0.15	5.07	0.1	192	192
87	Acid	1%-5%	5.07	0.15	5.15	0.08	192	192
87	Acid	1%-5%	5.07	0.15	5.35	0.21	192	192
87	Acid	1%-5%	5.07	0.15	5.27	0.18	192	192
87	Acid	1%-5%	5.07	0.15	5.11	0.03	192	192
96	Acid	1%-5%	4.3	0.02	4.74	0.06	192	192
96	Acid	1%-5%	4.3	0.02	5.11	0.04	192	192
112	Acid	1%-5%	4.4	0.1732	4.84	0.19052	192	192
112	Acid	1%-5%	4.4	0.19052	5.14	0.20784	192	192
112	Acid	1%-5%	4.2	0.1732	4.87	0.20784	192	192
112	Acid	1%-5%	4.14	0.15588	4.64	0.19052	192	192
115	Acid	1%-5%	5.67	0.22516	6.32	0.15588	192	192
115	Acid	1%-5%	6.02	0.06928	6.24	0.13856	192	192
115	Acid	1%-5%	6.32	0.12124	6.5	0	192	192
115	Acid	1%-5%	5.75	0.0866	6.06	0.0866	192	192
115	Acid	1%-5%	5.89	0.13856	6.11	0.13856	192	192
115	Acid	1%-5%	5.67	0.22516	6.24	0.22516	192	192
115	Acid	1%-5%	6.02	0.06928	6.5	0.06928	192	192
115	Acid	1%-5%	6.32	0.12124	6.5	0.06928	192	192
115	Acid	1%-5%	5.75	0.0866	6.06	0.0866	192	192
115	Acid	1%-5%	5.89	0.13856	6.32	0.31176	192	192
125	Acid	1%-5%	5.2	0	5.5	0	192	192
125	Acid	1%-5%	5.2	0	5.9	0	192	192
128	Acid	1%-5%	5.71	0.05196	6.17	0.0866	192	192
128	Acid	1%-5%	5.71	0.05196	6.33	0.03464	192	192
136	Acid	1%-5%	4.08	0.408	4.35	0.435	192	192
136	Acid	1%-5%	4.08	0.408	4.55	0.435	192	192
140	Acid	1%-5%	5.7	0.01	6	0.05	192	192
140	Acid	1%-5%	5.7	0.01	6.15	0.05	192	192
208	Acid	1%-5%	4.31	0.01732	4.39	0.03464	192	192
208	Acid	1%-5%	4.31	0.01732	4.54	0.01732	192	192
208	Acid	1%-5%	4.31	0.01732	4.67	0.10392	192	192
208	Acid	1%-5%	4.29	0.03464	4.73	0.10392	192	192
208	Acid	1%-5%	4.29	0.03464	4.4	0.1732	192	192
208	Acid	1%-5%	4.29	0.03464	4.51	0.05196	192	192
209	Acid	1%-5%	3.47	0.347	4.75	0.475	192	192
209	Acid	1%-5%	3.47	0.347	4	0.4	192	192
209	Acid	1%-5%	3.47	0.347	4.41	0.441	192	192
209	Acid	1%-5%	3.47	0.347	3.71	0.371	192	192
209	Acid	1%-5%	3.69	0.369	4.71	0.471	192	192
211	Acid	1%-5%	4.74	0.11	5.88	0.15	192	192
211	Acid	1%-5%	4.74	0.11	6.56	0.25	192	192
211	Acid	1%-5%	4.74	0.11	4.82	0.19	192	192
211	Acid	1%-5%	4.74	0.11	4.97	0.05	192	192
219	Acid	1%-5%	6.42	0.05	6.68	0.12	192	192
226	Acid	1%-5%	5.63	0.563	5.93	0.593	192	192
226	Acid	1%-5%	5.38	0.538	5.79	0.579	192	192
229	Acid	1%-5%	5.95	0.1	6.88	0.1	192	192
233	Acid	1%-5%	5.83	0.583	6.36	0.636	192	192
233	Acid	1%-5%	5.83	0.583	6.65	0.665	192	192
235	Acid	1%-5%	4.5	0.16	4.92	0.16	192	192
263	Acid	1%-5%	4.8	0.13856	5.21	0.29444	192	192
263	Acid	1%-5%	4.8	0.13856	5.23	0.10392	192	192
263	Acid	1%-5%	4.81	0.06928	4.87	0.15588	192	192
263	Acid	1%-5%	4.81	0.06928	5.13	0.24248	192	192
265	Acid	1%-5%	4.79	0.09	5.21	0.05	192	192
265	Acid	1%-5%	4.79	0.09	5.32	0.04	192	192
265	Acid	1%-5%	4.65	0.08	5.04	0.06	192	192
265	Acid	1%-5%	4.65	0.08	5.04	0.08	192	192
265	Acid	1%-5%	4.63	0.05	4.81	0.07	192	192
265	Acid	1%-5%	4.63	0.05	5.02	0.04	192	192
265	Acid	1%-5%	4.57	0.07	4.8	0.07	192	192
265	Acid	1%-5%	4.57	0.07	4.75	0.05	192	192
265	Acid	1%-5%	4.34	0.04	4.65	0.04	192	192
265	Acid	1%-5%	4.34	0.04	4.66	0.05	192	192
276	Acid	1%-5%	5.75	0.02	5.89	0.02	192	192
293	Acid	1%-5%	5.9	0.3464	6.5	0.0866	192	192
322	Acid	1%-5%	5.56	0.0866	6.33	0.10392	192	192
322	Acid	1%-5%	3.83	0.19052	4.17	0.0866	192	192
326	Acid	1%-5%	5.93	0.6062	6.46	0.03464	192	192
332	Acid	1%-5%	4.88	0.05	5.12	0.01	192	192
332	Acid	1%-5%	6.01	0.06	6.29	0.15	192	192
332	Acid	1%-5%	5.54	0.23	6.26	0.17	192	192
333	Acid	1%-5%	6.09	0.06	6.65	0.05	192	192
353	Acid	1%-5%	5.11	0.06928	5.31	0	192	192
353	Acid	1%-5%	5.06	0.506	5.1	0.51	192	192
366	Acid	1%-5%	5.9	0.28	7.58	0.39	192	192
413	Acid	1%-5%	6.19	0.01	6.3	0.06	192	192
413	Acid	1%-5%	6.19	0.01	6.47	0.03	192	192
413	Acid	1%-5%	6.19	0.02	6.69	0.09	192	192
413	Acid	1%-5%	6.19	0.02	6.98	0.01	192	192
413	Acid	1%-5%	6.31	0.06	6.32	0.06	192	192
413	Acid	1%-5%	6.31	0.06	6.38	0.02	192	192
413	Acid	1%-5%	6.19	0.11	6.48	0.06	192	192
413	Acid	1%-5%	6.19	0.11	6.8	0.04	192	192
413	Acid	1%-5%	6.22	0.07	6.41	0.04	192	192
413	Acid	1%-5%	6.22	0.07	6.51	0.05	192	192
413	Acid	1%-5%	6.32	0.04	6.75	0.06	192	192
413	Acid	1%-5%	6.32	0.04	7.02	0.04	192	192
413	Acid	1%-5%	6.32	0.06	6.41	0.08	192	192
413	Acid	1%-5%	6.32	0.06	6.45	0.07	192	192
413	Acid	1%-5%	6.39	0.07	6.52	0.04	192	192
413	Acid	1%-5%	6.39	0.07	6.82	0.08	192	192
413	Acid	1%-5%	6.24	0.08	6.38	0.08	192	192
413	Acid	1%-5%	6.24	0.08	6.51	0.08	192	192
413	Acid	1%-5%	6.35	0.05	6.75	0.04	192	192
413	Acid	1%-5%	6.35	0.05	7.01	0.01	192	192
413	Acid	1%-5%	6.31	0.08	6.33	0.05	192	192
413	Acid	1%-5%	6.31	0.08	6.38	0.01	192	192
413	Acid	1%-5%	6.27	0.05	6.44	0.06	192	192
413	Acid	1%-5%	6.27	0.05	6.81	0.07	192	192
438	Acid	1%-5%	4.94	0.19052	5.36	0.03464	192	192
438	Acid	1%-5%	4.94	0.19052	5.52	0.15588	192	192
438	Acid	1%-5%	4.96	0.10392	5.26	0.10392	192	192
438	Acid	1%-5%	4.96	0.10392	5.29	0.10392	192	192
448	Acid	1%-5%	5.41	0.05196	5.7	0.10392	192	192
448	Acid	1%-5%	5.41	0.05196	6.32	0.03464	192	192
468	Acid	1%-5%	5.49	0.02	5.84	0.18	192	192
468	Acid	1%-5%	5.67	0.06	5.9	0.18	192	192
468	Acid	1%-5%	6.3	0.1	6.55	0.12	192	192
473	Acid	1%-5%	7.05	0.05	7.15	0.03	192	192
473	Acid	1%-5%	7.06	0.02	7.13	0.03	192	192
473	Acid	1%-5%	5.77	0.01	5.86	0.01	192	192
473	Acid	1%-5%	5.68	0.02	5.85	0.01	192	192
482	Acid	1%-5%	6.03	0.06928	7.02	0.13856	192	192
482	Acid	1%-5%	6.01	0.0866	6.73	0.22516	192	192
509	Acid	1%-5%	5.99	0.10392	6.07	0.05196	192	192
509	Acid	1%-5%	5.99	0.10392	6.22	0.06928	192	192
509	Acid	1%-5%	5.69	0.13856	5.94	0.06928	192	192
509	Acid	1%-5%	5.69	0.13856	6.3	0.06928	192	192
523	Acid	1%-5%	6.88	0.14	7.58	0.02	192	192
559	Acid	1%-5%	4.55	0	4.67	0.01732	192	192
559	Acid	1%-5%	4.55	0	4.92	0.29444	192	192
559	Acid	1%-5%	4.55	0	4.75	0.03464	192	192
559	Acid	1%-5%	4.55	0	4.7	0.06928	192	192
565	Acid	1%-5%	5.68	0.03464	5.79	0.06928	192	192
565	Acid	1%-5%	5.68	0.03464	5.79	0.06928	192	192
565	Acid	1%-5%	5.71	0.03464	5.79	0.03464	192	192
565	Acid	1%-5%	5.71	0.03464	5.83	0.01732	192	192
577	Acid	1%-5%	6.07	0	6.43	0	192	192
577	Acid	1%-5%	6.27	0.05196	6.39	0.06928	192	192
577	Acid	1%-5%	6.78	0.05196	6.33	0.05196	192	192
577	Acid	1%-5%	5.69	0.15588	5.98	0.10392	192	192
577	Acid	1%-5%	6.53	0.05196	6.82	0.10392	192	192
577	Acid	1%-5%	6.59	0.05196	6.69	0.05196	192	192
577	Acid	1%-5%	6.3	0.06928	6.75	0.05196	192	192
68	Neutral	1%-5%	6.53	0.11	6.77	0.12	20	20
68	Neutral	1%-5%	6.53	0.04	6.89	0.11	20	20
111	Neutral	1%-5%	6.67	0.03	6.74	0.03	20	20
111	Neutral	1%-5%	6.64	0.01	6.71	0.05	20	20
111	Neutral	1%-5%	6.62	0.03	6.69	0.02	20	20
111	Neutral	1%-5%	6.71	0.04	6.76	0.02	20	20
111	Neutral	1%-5%	6.72	0.01	6.75	0.04	20	20
111	Neutral	1%-5%	6.72	0.02	6.75	0.01	20	20
232	Neutral	1%-5%	7.17	0.717	7.4	0.74	20	20
232	Neutral	1%-5%	7.17	0.717	7.43	0.743	20	20
232	Neutral	1%-5%	7.17	0.717	7.55	0.755	20	20
232	Neutral	1%-5%	7.17	0.717	7.65	0.765	20	20
232	Neutral	1%-5%	7.17	0.717	7.7	0.77	20	20
232	Neutral	1%-5%	7.17	0.717	7.79	0.779	20	20
301	Neutral	1%-5%	6.69	0.13856	7.08	0.06928	20	20
445	Neutral	1%-5%	6.38	0.638	7.12	0.712	20	20
476	Neutral	1%-5%	6.52	0.13856	6.85	0.32908	20	20
494	Neutral	1%-5%	6.84	0.06928	6.97	0.01732	20	20
494	Neutral	1%-5%	6.96	0.06928	7.1	0.06928	20	20
508	Neutral	1%-5%	6.38	0.638	7.12	0.712	20	20
32	Alkaline	1%-5%	7.87	0.11	7.79	0.18	86	86
32	Alkaline	1%-5%	8.01	0.08	7.99	0.08	86	86
36	Alkaline	1%-5%	7.72	0.03464	7.76	0.05196	86	86
36	Alkaline	1%-5%	7.72	0.03464	7.79	0.05196	86	86
36	Alkaline	1%-5%	7.72	0.03464	7.83	0.05196	86	86
40	Alkaline	1%-5%	8.47	0.04	8.26	0.08	86	86
40	Alkaline	1%-5%	8.47	0.04	8.28	0.06	86	86
40	Alkaline	1%-5%	8.47	0.04	8.18	0.04	86	86
40	Alkaline	1%-5%	8.47	0.04	8.24	0.02	86	86
40	Alkaline	1%-5%	8.35	0.1	7.77	0.12	86	86
40	Alkaline	1%-5%	8.35	0.1	7.81	0.09	86	86
40	Alkaline	1%-5%	8.29	0.06	7.96	0.02	86	86
40	Alkaline	1%-5%	8.29	0.06	8.12	0.06	86	86
61	Alkaline	1%-5%	8.06	0.05	8.15	0.05	86	86
61	Alkaline	1%-5%	8.06	0.05	8.17	0.07	86	86
91	Alkaline	1%-5%	8.28	0.05196	7.93	0.41568	86	86
91	Alkaline	1%-5%	8.28	0.05196	8.14	0.05196	86	86
128	Alkaline	1%-5%	8	0.03464	8.11	0.06928	86	86
128	Alkaline	1%-5%	8	0.03464	8.13	0.03464	86	86
146	Alkaline	1%-5%	8.08	0.808	7.86	0.786	86	86
146	Alkaline	1%-5%	8.08	0.808	7.85	0.785	86	86
146	Alkaline	1%-5%	8.08	0.808	8.05	0.805	86	86
146	Alkaline	1%-5%	8.08	0.808	7.99	0.799	86	86
162	Alkaline	1%-5%	8.44	0.844	8.65	0.865	86	86
162	Alkaline	1%-5%	8.44	0.844	8.68	0.868	86	86
162	Alkaline	1%-5%	8.41	0.841	8.54	0.854	86	86
162	Alkaline	1%-5%	8.41	0.841	8.56	0.856	86	86
162	Alkaline	1%-5%	8.31	0.831	8.4	0.84	86	86
162	Alkaline	1%-5%	8.31	0.831	8.43	0.843	86	86
162	Alkaline	1%-5%	8.46	0.846	8.69	0.869	86	86
162	Alkaline	1%-5%	8.46	0.846	8.71	0.871	86	86
162	Alkaline	1%-5%	8.42	0.842	8.55	0.855	86	86
162	Alkaline	1%-5%	8.42	0.842	8.56	0.856	86	86
162	Alkaline	1%-5%	8.33	0.833	8.42	0.842	86	86
162	Alkaline	1%-5%	8.33	0.833	8.44	0.844	86	86
175	Alkaline	1%-5%	8.25	0.06	8.18	0.03	86	86
240	Alkaline	1%-5%	7.08	0.2598	7.23	0.3464	86	86
240	Alkaline	1%-5%	7.08	0.2598	7.22	0.2598	86	86
240	Alkaline	1%-5%	7.08	0.2598	7.41	0.48496	86	86
240	Alkaline	1%-5%	7.66	0.2598	7.7	0.2598	86	86
240	Alkaline	1%-5%	7.66	0.2598	7.81	0.39836	86	86
240	Alkaline	1%-5%	7.66	0.2598	7.94	0.79672	86	86
302	Alkaline	1%-5%	8.08	0.02	8.26	0.03	86	86
302	Alkaline	1%-5%	7.22	0.03	7.62	0.03	86	86
303	Alkaline	1%-5%	8.03	0.803	8.36	0.836	86	86
303	Alkaline	1%-5%	8.3	0.83	8.24	0.824	86	86
303	Alkaline	1%-5%	8.23	0.823	8.39	0.839	86	86
303	Alkaline	1%-5%	8.3	0.83	8.24	0.824	86	86
400	Alkaline	1%-5%	8.46	0.01	8.47	0.04	86	86
400	Alkaline	1%-5%	8.42	0.01	8.41	0.03	86	86
400	Alkaline	1%-5%	8.39	0.02	8.37	0.02	86	86
400	Alkaline	1%-5%	8.37	0	8.38	0.04	86	86
441	Alkaline	1%-5%	8.4	0.01732	8.32	0.01732	86	86
441	Alkaline	1%-5%	8.38	0.01732	8.32	0.01732	86	86
442	Alkaline	1%-5%	8.25	0.06	8.23	0.04	86	86
456	Alkaline	1%-5%	8.85	0.885	8.91	0.891	86	86
462	Alkaline	1%-5%	8.21	0.02	8.35	0.02	86	86
462	Alkaline	1%-5%	8.21	0.02	8.37	0.04	86	86
462	Alkaline	1%-5%	8.22	0.03	8.21	8.25	86	86
462	Alkaline	1%-5%	8.22	0.03	8.19	8.21	86	86
462	Alkaline	1%-5%	8.04	0.03	8.05	0.01	86	86
462	Alkaline	1%-5%	8.04	0.03	8.05	0.07	86	86
463	Alkaline	1%-5%	7.66	0.20784	7.7	0.13856	86	86
463	Alkaline	1%-5%	7.66	0.20784	7.81	0.20784	86	86
463	Alkaline	1%-5%	7.66	0.20784	7.93	0.793	86	86
476	Alkaline	1%-5%	8.89	0.2598	9.05	0.45032	86	86
489	Alkaline	1%-5%	7.87	0.01732	8.21	0.05196	86	86
489	Alkaline	1%-5%	7.87	0.01732	8.39	0.05196	86	86
489	Alkaline	1%-5%	7.94	0.12124	8.23	0.03464	86	86
489	Alkaline	1%-5%	7.94	0.12124	8.33	0.05196	86	86
489	Alkaline	1%-5%	7.95	0.13856	8.27	0.10392	86	86
489	Alkaline	1%-5%	7.95	0.13856	8.38	0.03464	86	86
501	Alkaline	1%-5%	8.19	0.12124	8.26	0.01732	86	86
501	Alkaline	1%-5%	8.19	0.12124	8.33	0.06928	86	86
501	Alkaline	1%-5%	8.1	0.06928	8.1	0.10392	86	86
501	Alkaline	1%-5%	8.1	0.06928	8.15	0.03464	86	86
501	Alkaline	1%-5%	8.02	0.24248	8.21	0.2598	86	86
501	Alkaline	1%-5%	8.02	0.24248	8.27	0.12124	86	86
501	Alkaline	1%-5%	8.27	0.06928	8.31	0.29444	86	86
501	Alkaline	1%-5%	8.27	0.06928	8.35	0.20784	86	86
501	Alkaline	1%-5%	8.37	0.06928	8.49	0.0866	86	86
501	Alkaline	1%-5%	8.37	0.06928	8.49	0.12124	86	86
565	Alkaline	1%-5%	7.88	0.01732	8.19	0	86	86
565	Alkaline	1%-5%	7.88	0.01732	8.3	0	86	86
565	Alkaline	1%-5%	8.08	0.01732	8.23	0.01732	86	86
565	Alkaline	1%-5%	8.08	0.01732	8.42	0.01732	86	86
22	Acid	5%-10%	4.95	0.495	7.69	0.265	45	45
96	Acid	5%-10%	4.3	0.02	5.2	0.01	45	45
96	Acid	5%-10%	4.3	0.02	5.3	0.11	45	45
105	Acid	5%-10%	4.48	0.04	6.03	0.04	45	45
105	Acid	5%-10%	4.56	0.04	6.17	0.02	45	45
134	Acid	5%-10%	3.95	0.01732	4.3	0.01732	45	45
134	Acid	5%-10%	3.95	0.01732	4.6	0	45	45
134	Acid	5%-10%	3.95	0.01732	5.17	0.03464	45	45
134	Acid	5%-10%	3.95	0.01732	4.35	0	45	45
134	Acid	5%-10%	3.95	0.01732	4.48	0.01732	45	45
134	Acid	5%-10%	3.95	0.01732	4.8	0.01732	45	45
134	Acid	5%-10%	3.95	0.01732	4.36	0	45	45
134	Acid	5%-10%	3.95	0.01732	4.82	0.05196	45	45
134	Acid	5%-10%	3.95	0.01732	5.2	0.01732	45	45
134	Acid	5%-10%	3.95	0.01732	4.4	0	45	45
134	Acid	5%-10%	3.95	0.01732	4.86	0.01732	45	45
134	Acid	5%-10%	3.95	0.01732	5.22	0.01732	45	45
322	Acid	5%-10%	5.56	0.0866	6.67	0.0866	45	45
322	Acid	5%-10%	3.83	0.19052	4.56	0.0866	45	45
324	Acid	5%-10%	5.36	0.05	5.59	0.02	45	45
396	Acid	5%-10%	5.21	0.14	6.82	0.18	45	45
396	Acid	5%-10%	5.21	0.14	6.78	0.16	45	45
396	Acid	5%-10%	5.21	0.14	6.41	0.15	45	45
413	Acid	5%-10%	6.19	0.01	6.8	0.05	45	45
413	Acid	5%-10%	6.19	0.02	7.8	0.04	45	45
413	Acid	5%-10%	6.31	0.06	6.55	0.06	45	45
413	Acid	5%-10%	6.19	0.11	7.51	0.08	45	45
413	Acid	5%-10%	6.22	0.07	6.84	0.12	45	45
413	Acid	5%-10%	6.32	0.04	7.83	0.02	45	45
413	Acid	5%-10%	6.32	0.06	6.59	0.01	45	45
413	Acid	5%-10%	6.39	0.07	7.54	0.09	45	45
413	Acid	5%-10%	6.24	0.08	6.87	0.15	45	45
413	Acid	5%-10%	6.35	0.05	7.89	0.04	45	45
413	Acid	5%-10%	6.31	0.08	6.58	0.03	45	45
413	Acid	5%-10%	6.27	0.05	7.59	0.09	45	45
509	Acid	5%-10%	5.99	0.10392	6.66	0.10392	45	45
509	Acid	5%-10%	5.69	0.13856	6.7	0.05196	45	45
577	Acid	5%-10%	6.07	0	6.49	0.15588	45	45
577	Acid	5%-10%	6.27	0.05196	6.78	0	45	45
577	Acid	5%-10%	6.78	0.05196	7.04	0.06928	45	45
577	Acid	5%-10%	5.98	0.15588	6.01	0.3464	45	45
577	Acid	5%-10%	5.69	0.15588	5.98	0.05196	45	45
577	Acid	5%-10%	6.53	0.05196	7.26	0.06928	45	45
577	Acid	5%-10%	6.59	0.05196	6.66	0.05196	45	45
577	Acid	5%-10%	6.3	0.06928	6.5	0.05196	45	45
301	Neutral	5%-10%	6.69	0.13856	7.14	0.06928	5	5
370	Neutral	5%-10%	7.31	0.35	7.61	0.32	5	5
370	Neutral	5%-10%	7.24	0.1	7.46	0.03	5	5
445	Neutral	5%-10%	6.38	0.638	7.72	0.772	5	5
508	Neutral	5%-10%	6.38	0.638	7.72	0.772	5	5
61	Alkaline	5%-10%	8.06	0.05	8.18	0.03	14	14
91	Alkaline	5%-10%	8.28	0.05196	8.15	0.03464	14	14
162	Alkaline	5%-10%	8.44	0.844	8.7	0.87	14	14
162	Alkaline	5%-10%	8.41	0.841	8.56	0.856	14	14
162	Alkaline	5%-10%	8.31	0.831	8.45	0.845	14	14
162	Alkaline	5%-10%	8.46	0.846	8.73	0.873	14	14
162	Alkaline	5%-10%	8.42	0.842	8.58	0.858	14	14
162	Alkaline	5%-10%	8.33	0.833	8.46	0.846	14	14
175	Alkaline	5%-10%	8.25	0.06	8.11	0.04	14	14
175	Alkaline	5%-10%	8.25	0.06	7.99	0.01	14	14
442	Alkaline	5%-10%	8.25	0.06	8.18	0.04	14	14
489	Alkaline	5%-10%	7.87	0.01732	8.51	0.06928	14	14
489	Alkaline	5%-10%	7.94	0.12124	8.5	0.06928	14	14
489	Alkaline	5%-10%	7.95	0.13856	8.47	0.01732	14	14
324	Acid	10%-20%	5.36	0.05	5.63	0.05	3	3
324	Acid	10%-20%	5.36	0.05	5.69	0.06	3	3
324	Acid	10%-20%	5.36	0.05	5.74	0.03	3	3
301	Neutral	10%-20%	6.69	0.13856	7.17	0.10392	7	7
370	Neutral	10%-20%	7.31	0.35	7.81	0.15	7	7
370	Neutral	10%-20%	7.31	0.35	8.06	0.1	7	7
370	Neutral	10%-20%	7.31	0.35	8.18	0.15	7	7
370	Neutral	10%-20%	7.24	0.1	7.51	0.23	7	7
370	Neutral	10%-20%	7.24	0.1	7.49	0.05	7	7
370	Neutral	10%-20%	7.24	0.1	8.03	0.1	7	7
442	Alkaline	10%-20%	8.25	0.06	8.01	0.06	1	1

## Sheet: Biochar types and temperature
Num.	Soil pH	Types of biochar	Biochar temperature	Control pH	Control SD	Experiment pH	Experiment SD	Sample size of control group	Sample size of experiment group
50	Acid	Straw biochar	200-400	5.27	0.0866	5.71	0.38104	22	22
50	Acid	Straw biochar	200-400	5.27	0.0866	6.01	0.32908	22	22
50	Acid	Straw biochar	200-400	5.27	0.0866	6.12	0.12124	22	22
50	Acid	Straw biochar	200-400	5.27	0.0866	6.25	0.01732	22	22
50	Acid	Straw biochar	200-400	6.34	0.41568	6.79	0.12124	22	22
50	Acid	Straw biochar	200-400	6.34	0.41568	6.97	0.57156	22	22
50	Acid	Straw biochar	200-400	6.34	0.41568	6.99	0.41568	22	22
50	Acid	Straw biochar	200-400	6.34	0.41568	7.23	0.2598	22	22
87	Acid	Straw biochar	200-400	4.61	0.11	4.89	0.01	22	22
87	Acid	Straw biochar	200-400	4.61	0.11	4.96	0.01	22	22
87	Acid	Straw biochar	200-400	4.61	0.11	5.02	0.02	22	22
87	Acid	Straw biochar	200-400	4.61	0.11	4.96	0.02	22	22
87	Acid	Straw biochar	200-400	5.07	0.15	5.12	0.1	22	22
87	Acid	Straw biochar	200-400	5.07	0.15	5.25	0.13	22	22
87	Acid	Straw biochar	200-400	5.07	0.15	5.07	0.1	22	22
87	Acid	Straw biochar	200-400	5.07	0.15	5.15	0.08	22	22
134	Acid	Straw biochar	200-400	3.95	0.01732	4.3	0.01732	22	22
134	Acid	Straw biochar	200-400	3.95	0.01732	4.35	0	22	22
134	Acid	Straw biochar	200-400	3.95	0.01732	4.36	0	22	22
134	Acid	Straw biochar	200-400	3.95	0.01732	4.4	0	22	22
559	Acid	Straw biochar	200-400	4.55	0	4.67	0.01732	22	22
559	Acid	Straw biochar	200-400	4.55	0	4.75	0.03464	22	22
16	Acid	Straw biochar	400-600	4.46	0.09	5.1	0.35	241	241
16	Acid	Straw biochar	400-600	4.46	0.09	5	0.01	241	241
16	Acid	Straw biochar	400-600	4.41	0.04	4.53	0.39	241	241
16	Acid	Straw biochar	400-600	4.41	0.04	4.73	0.19	241	241
16	Acid	Straw biochar	400-600	4.63	0.01	4.69	0.23	241	241
16	Acid	Straw biochar	400-600	4.63	0.01	4.67	0.17	241	241
16	Acid	Straw biochar	400-600	4.59	0.2	4.66	0.36	241	241
17	Acid	Straw biochar	400-600	6.56	0.056	6.71	0.06	241	241
17	Acid	Straw biochar	400-600	6.56	0.056	6.87	0.05	241	241
22	Acid	Straw biochar	400-600	5.07	0.507	5.07	0.507	241	241
22	Acid	Straw biochar	400-600	5.07	0.507	5.29	0.529	241	241
22	Acid	Straw biochar	400-600	5.07	0.507	5.14	0.514	241	241
22	Acid	Straw biochar	400-600	4.95	0.495	5.13	0.272	241	241
22	Acid	Straw biochar	400-600	4.95	0.495	6.81	0.238	241	241
22	Acid	Straw biochar	400-600	4.95	0.495	7.69	0.265	241	241
24	Acid	Straw biochar	400-600	5.69	0.08	5.93	0.04	241	241
24	Acid	Straw biochar	400-600	5.69	0.08	6.38	0.1	241	241
24	Acid	Straw biochar	400-600	5.75	0.08	5.92	0.11	241	241
24	Acid	Straw biochar	400-600	5.75	0.08	6.35	0.07	241	241
24	Acid	Straw biochar	400-600	5.98	0.2	6.31	0.55	241	241
24	Acid	Straw biochar	400-600	5.98	0.2	6.45	0.15	241	241
24	Acid	Straw biochar	400-600	5.89	0.2	6.1	0.22	241	241
24	Acid	Straw biochar	400-600	5.89	0.2	6.4	0.06	241	241
34	Acid	Straw biochar	400-600	3.77	0.01	3.88	0.03	241	241
34	Acid	Straw biochar	400-600	5.17	0.03	5.32	0.02	241	241
34	Acid	Straw biochar	400-600	4.52	0.04	4.83	0.01	241	241
34	Acid	Straw biochar	400-600	3.85	0.01	3.96	0.01	241	241
34	Acid	Straw biochar	400-600	3.81	0.02	4.05	0.01	241	241
37	Acid	Straw biochar	400-600	5.3	0.03	5.42	0.07	241	241
37	Acid	Straw biochar	400-600	5.3	0.03	5.61	0.11	241	241
48	Acid	Straw biochar	400-600	4.76	0.07	4.8	0.04	241	241
48	Acid	Straw biochar	400-600	4.76	0.07	5.05	0.08	241	241
48	Acid	Straw biochar	400-600	4.81	0.02	4.83	0.06	241	241
48	Acid	Straw biochar	400-600	4.81	0.02	5.92	0.05	241	241
52	Acid	Straw biochar	400-600	5.54	0.24	6.12	0.04	241	241
52	Acid	Straw biochar	400-600	5.49	0.2	6.03	0.17	241	241
52	Acid	Straw biochar	400-600	5.37	0.14	5.72	0.06	241	241
52	Acid	Straw biochar	400-600	5.42	0.02	5.69	0.27	241	241
52	Acid	Straw biochar	400-600	5.23	0.09	5.71	0.11	241	241
54	Acid	Straw biochar	400-600	5.71	0.571	6.62	0.662	241	241
56	Acid	Straw biochar	400-600	4.61	0.1732	4.65	0.22516	241	241
56	Acid	Straw biochar	400-600	4.61	0.1732	4.82	0.12124	241	241
56	Acid	Straw biochar	400-600	4.61	0.1732	4.86	0.1732	241	241
56	Acid	Straw biochar	400-600	4.61	0.1732	5.22	0.24248	241	241
60	Acid	Straw biochar	400-600	5.46	0.546	6.69	0.669	241	241
60	Acid	Straw biochar	400-600	5.17	0.517	6.64	0.664	241	241
60	Acid	Straw biochar	400-600	4.97	0.497	6.27	0.627	241	241
76	Acid	Straw biochar	400-600	4.63	0.463	5.32	0.532	241	241
76	Acid	Straw biochar	400-600	5.04	0.504	5.9	0.59	241	241
76	Acid	Straw biochar	400-600	5.32	0.532	6	0.6	241	241
76	Acid	Straw biochar	400-600	4.84	0.484	5.45	0.545	241	241
76	Acid	Straw biochar	400-600	5.13	0.513	5.91	0.591	241	241
76	Acid	Straw biochar	400-600	6.08	0.608	6.08	0.608	241	241
79	Acid	Straw biochar	400-600	5.4	0.3	6	0.2	241	241
79	Acid	Straw biochar	400-600	5.4	0.2	6.6	0.1	241	241
79	Acid	Straw biochar	400-600	5.3	0.2	6.2	0.4	241	241
79	Acid	Straw biochar	400-600	5.2	0	5.7	0.5	241	241
79	Acid	Straw biochar	400-600	5.2	0.2	6	0.4	241	241
79	Acid	Straw biochar	400-600	5.5	0.6	5.8	0.3	241	241
86	Acid	Straw biochar	400-600	3.9	0.02	4	0.05	241	241
87	Acid	Straw biochar	400-600	4.61	0.11	4.94	0.02	241	241
87	Acid	Straw biochar	400-600	4.61	0.11	4.98	0.03	241	241
87	Acid	Straw biochar	400-600	4.61	0.11	5.2	0	241	241
87	Acid	Straw biochar	400-600	4.61	0.11	4.72	0.05	241	241
87	Acid	Straw biochar	400-600	5.07	0.15	5.37	0.13	241	241
87	Acid	Straw biochar	400-600	5.07	0.15	5.25	0.01	241	241
87	Acid	Straw biochar	400-600	5.07	0.15	5.35	0.21	241	241
87	Acid	Straw biochar	400-600	5.07	0.15	5.27	0.18	241	241
96	Acid	Straw biochar	400-600	4.3	0.02	5.11	0.04	241	241
96	Acid	Straw biochar	400-600	4.3	0.02	5.3	0.11	241	241
105	Acid	Straw biochar	400-600	4.48	0.04	6.03	0.04	241	241
105	Acid	Straw biochar	400-600	4.56	0.04	6.17	0.02	241	241
115	Acid	Straw biochar	400-600	5.67	0.22516	6.32	0.15588	241	241
115	Acid	Straw biochar	400-600	6.02	0.06928	6.24	0.13856	241	241
115	Acid	Straw biochar	400-600	6.32	0.12124	6.5	0	241	241
115	Acid	Straw biochar	400-600	5.75	0.0866	6.06	0.0866	241	241
115	Acid	Straw biochar	400-600	5.89	0.13856	6.11	0.13856	241	241
115	Acid	Straw biochar	400-600	5.67	0.22516	6.24	0.22516	241	241
115	Acid	Straw biochar	400-600	6.02	0.06928	6.5	0.06928	241	241
115	Acid	Straw biochar	400-600	6.32	0.12124	6.5	0.06928	241	241
115	Acid	Straw biochar	400-600	5.75	0.0866	6.06	0.0866	241	241
115	Acid	Straw biochar	400-600	5.89	0.13856	6.32	0.31176	241	241
125	Acid	Straw biochar	400-600	5.2	0	5.5	0	241	241
125	Acid	Straw biochar	400-600	5.2	0	5.9	0	241	241
134	Acid	Straw biochar	400-600	3.95	0.01732	4.6	0	241	241
134	Acid	Straw biochar	400-600	3.95	0.01732	4.48	0.01732	241	241
134	Acid	Straw biochar	400-600	3.95	0.01732	4.82	0.05196	241	241
134	Acid	Straw biochar	400-600	3.95	0.01732	4.86	0.01732	241	241
140	Acid	Straw biochar	400-600	5.7	0.01	5.78	0.02	241	241
140	Acid	Straw biochar	400-600	5.7	0.01	6	0.05	241	241
140	Acid	Straw biochar	400-600	5.7	0.01	6.15	0.05	241	241
208	Acid	Straw biochar	400-600	4.31	0.01732	4.39	0.03464	241	241
208	Acid	Straw biochar	400-600	4.31	0.01732	4.54	0.01732	241	241
208	Acid	Straw biochar	400-600	4.31	0.01732	4.67	0.10392	241	241
208	Acid	Straw biochar	400-600	4.29	0.03464	4.73	0.10392	241	241
208	Acid	Straw biochar	400-600	4.29	0.03464	4.4	0.1732	241	241
208	Acid	Straw biochar	400-600	4.29	0.03464	4.51	0.05196	241	241
209	Acid	Straw biochar	400-600	3.47	0.347	4.75	0.475	241	241
209	Acid	Straw biochar	400-600	3.47	0.347	3.74	0.374	241	241
209	Acid	Straw biochar	400-600	3.47	0.347	4	0.4	241	241
209	Acid	Straw biochar	400-600	3.47	0.347	4.41	0.441	241	241
209	Acid	Straw biochar	400-600	3.47	0.347	3.71	0.371	241	241
209	Acid	Straw biochar	400-600	3.69	0.369	4.71	0.471	241	241
211	Acid	Straw biochar	400-600	4.74	0.11	4.82	0.19	241	241
211	Acid	Straw biochar	400-600	4.74	0.11	4.97	0.05	241	241
226	Acid	Straw biochar	400-600	5.63	0.563	5.84	0.584	241	241
226	Acid	Straw biochar	400-600	5.63	0.563	5.93	0.593	241	241
226	Acid	Straw biochar	400-600	5.38	0.538	5.49	0.549	241	241
226	Acid	Straw biochar	400-600	5.38	0.538	5.79	0.579	241	241
229	Acid	Straw biochar	400-600	5.95	0.1	6.88	0.1	241	241
233	Acid	Straw biochar	400-600	5.83	0.583	6.36	0.636	241	241
233	Acid	Straw biochar	400-600	5.83	0.583	6.65	0.665	241	241
235	Acid	Straw biochar	400-600	4.5	0.16	4.92	0.16	241	241
263	Acid	Straw biochar	400-600	4.8	0.13856	4.97	0.10392	241	241
263	Acid	Straw biochar	400-600	4.8	0.13856	4.97	0.24248	241	241
263	Acid	Straw biochar	400-600	4.8	0.13856	5.12	0.31176	241	241
263	Acid	Straw biochar	400-600	4.8	0.13856	5.04	0.19052	241	241
263	Acid	Straw biochar	400-600	4.8	0.13856	5.21	0.29444	241	241
263	Acid	Straw biochar	400-600	4.8	0.13856	5.23	0.10392	241	241
263	Acid	Straw biochar	400-600	4.81	0.06928	4.81	0.20784	241	241
263	Acid	Straw biochar	400-600	4.81	0.06928	4.87	0.19052	241	241
263	Acid	Straw biochar	400-600	4.81	0.06928	4.91	0.12124	241	241
263	Acid	Straw biochar	400-600	4.81	0.06928	4.87	0.15588	241	241
263	Acid	Straw biochar	400-600	4.81	0.06928	5.13	0.24248	241	241
265	Acid	Straw biochar	400-600	4.79	0.09	4.84	0.07	241	241
265	Acid	Straw biochar	400-600	4.79	0.09	4.88	0.07	241	241
265	Acid	Straw biochar	400-600	4.79	0.09	5.02	0.08	241	241
265	Acid	Straw biochar	400-600	4.79	0.09	5.19	0.07	241	241
265	Acid	Straw biochar	400-600	4.79	0.09	5.21	0.05	241	241
265	Acid	Straw biochar	400-600	4.79	0.09	5.32	0.04	241	241
265	Acid	Straw biochar	400-600	4.65	0.08	4.76	0.05	241	241
265	Acid	Straw biochar	400-600	4.65	0.08	4.88	0.08	241	241
265	Acid	Straw biochar	400-600	4.65	0.08	4.8	0.08	241	241
265	Acid	Straw biochar	400-600	4.65	0.08	4.91	0.06	241	241
265	Acid	Straw biochar	400-600	4.65	0.08	5.04	0.06	241	241
265	Acid	Straw biochar	400-600	4.65	0.08	5.04	0.08	241	241
265	Acid	Straw biochar	400-600	4.63	0.05	4.75	0.08	241	241
265	Acid	Straw biochar	400-600	4.63	0.05	4.73	0.07	241	241
265	Acid	Straw biochar	400-600	4.63	0.05	4.8	0.07	241	241
265	Acid	Straw biochar	400-600	4.63	0.05	4.88	0.05	241	241
265	Acid	Straw biochar	400-600	4.63	0.05	4.81	0.07	241	241
265	Acid	Straw biochar	400-600	4.63	0.05	5.02	0.04	241	241
265	Acid	Straw biochar	400-600	4.57	0.07	4.6	0.06	241	241
265	Acid	Straw biochar	400-600	4.57	0.07	4.76	0.07	241	241
265	Acid	Straw biochar	400-600	4.57	0.07	4.73	0.07	241	241
265	Acid	Straw biochar	400-600	4.57	0.07	4.79	0.04	241	241
265	Acid	Straw biochar	400-600	4.57	0.07	4.8	0.07	241	241
265	Acid	Straw biochar	400-600	4.57	0.07	4.75	0.05	241	241
265	Acid	Straw biochar	400-600	4.34	0.04	4.36	0.07	241	241
265	Acid	Straw biochar	400-600	4.34	0.04	4.36	0.05	241	241
265	Acid	Straw biochar	400-600	4.34	0.04	4.58	0.06	241	241
265	Acid	Straw biochar	400-600	4.34	0.04	4.52	0.04	241	241
265	Acid	Straw biochar	400-600	4.34	0.04	4.65	0.04	241	241
265	Acid	Straw biochar	400-600	4.34	0.04	4.66	0.05	241	241
283	Acid	Straw biochar	400-600	6.07	0.12	6.07	0.12	241	241
283	Acid	Straw biochar	400-600	6.07	0.12	6.19	0.08	241	241
283	Acid	Straw biochar	400-600	5.66	0.04	6.09	0.08	241	241
283	Acid	Straw biochar	400-600	5.66	0.04	6.21	0.12	241	241
324	Acid	Straw biochar	400-600	5.36	0.05	5.59	0.02	241	241
324	Acid	Straw biochar	400-600	5.36	0.05	5.63	0.05	241	241
324	Acid	Straw biochar	400-600	5.36	0.05	5.69	0.06	241	241
324	Acid	Straw biochar	400-600	5.36	0.05	5.74	0.03	241	241
326	Acid	Straw biochar	400-600	5.93	0.6062	6.11	0.15588	241	241
326	Acid	Straw biochar	400-600	5.93	0.6062	6.46	0.03464	241	241
332	Acid	Straw biochar	400-600	4.88	0.05	4.99	0.13	241	241
332	Acid	Straw biochar	400-600	4.88	0.05	5.12	0.01	241	241
332	Acid	Straw biochar	400-600	6.01	0.06	6.15	0.02	241	241
332	Acid	Straw biochar	400-600	6.01	0.06	6.29	0.15	241	241
332	Acid	Straw biochar	400-600	5.54	0.23	5.89	0.05	241	241
332	Acid	Straw biochar	400-600	5.54	0.23	6.26	0.17	241	241
333	Acid	Straw biochar	400-600	6.09	0.06	6.14	0.07	241	241
333	Acid	Straw biochar	400-600	6.09	0.06	6.65	0.05	241	241
342	Acid	Straw biochar	400-600	5.51	0.05196	6.23	0.15588	241	241
342	Acid	Straw biochar	400-600	5.42	0.06928	6.5	0.05196	241	241
342	Acid	Straw biochar	400-600	5.32	0.29444	6.26	0.0866	241	241
366	Acid	Straw biochar	400-600	5.9	0.28	7.58	0.39	241	241
392	Acid	Straw biochar	400-600	4.77	0.477	4.81	0.481	241	241
392	Acid	Straw biochar	400-600	4.77	0.477	5.05	0.505	241	241
392	Acid	Straw biochar	400-600	4.6	0.46	4.77	0.477	241	241
392	Acid	Straw biochar	400-600	4.6	0.46	6.18	0.618	241	241
392	Acid	Straw biochar	400-600	4.39	0.439	4.53	0.453	241	241
392	Acid	Straw biochar	400-600	4.39	0.439	6.45	0.645	241	241
392	Acid	Straw biochar	400-600	4.7	0.47	5.05	0.505	241	241
392	Acid	Straw biochar	400-600	4.7	0.47	7.28	0.728	241	241
392	Acid	Straw biochar	400-600	4.12	0.412	4.6	0.46	241	241
392	Acid	Straw biochar	400-600	4.12	0.412	7.18	0.718	241	241
392	Acid	Straw biochar	400-600	4.81	0.481	4.84	0.484	241	241
392	Acid	Straw biochar	400-600	4.81	0.481	5.94	0.594	241	241
392	Acid	Straw biochar	400-600	5.08	0.508	5.22	0.522	241	241
392	Acid	Straw biochar	400-600	5.08	0.508	6.76	0.676	241	241
392	Acid	Straw biochar	400-600	4.91	0.491	6.56	0.656	241	241
392	Acid	Straw biochar	400-600	4.81	0.481	5.12	0.512	241	241
392	Acid	Straw biochar	400-600	4.81	0.481	7.31	0.731	241	241
392	Acid	Straw biochar	400-600	3.78	0.378	4.53	0.453	241	241
392	Acid	Straw biochar	400-600	3.78	0.378	7.07	0.707	241	241
393	Acid	Straw biochar	400-600	4.09	0.1732	4.43	0.19052	241	241
396	Acid	Straw biochar	400-600	5.21	0.14	6.78	0.16	241	241
396	Acid	Straw biochar	400-600	5.21	0.14	6.41	0.15	241	241
425	Acid	Straw biochar	400-600	4.45	0.03464	4.56	0.10392	241	241
425	Acid	Straw biochar	400-600	4.45	0.03464	4.65	0.0866	241	241
425	Acid	Straw biochar	400-600	4.45	0.03464	4.78	0.10392	241	241
438	Acid	Straw biochar	400-600	4.94	0.19052	5.36	0.03464	241	241
438	Acid	Straw biochar	400-600	4.94	0.19052	5.52	0.15588	241	241
438	Acid	Straw biochar	400-600	4.96	0.10392	5.26	0.10392	241	241
438	Acid	Straw biochar	400-600	4.96	0.10392	5.29	0.10392	241	241
448	Acid	Straw biochar	400-600	5.41	0.05196	5.49	0.03464	241	241
448	Acid	Straw biochar	400-600	5.41	0.05196	5.7	0.10392	241	241
448	Acid	Straw biochar	400-600	5.41	0.05196	6.32	0.03464	241	241
468	Acid	Straw biochar	400-600	5.49	0.02	5.54	0.06	241	241
468	Acid	Straw biochar	400-600	5.49	0.02	5.84	0.18	241	241
468	Acid	Straw biochar	400-600	5.67	0.06	5.75	0.04	241	241
468	Acid	Straw biochar	400-600	5.67	0.06	5.9	0.18	241	241
468	Acid	Straw biochar	400-600	6.3	0.1	6.55	0.12	241	241
473	Acid	Straw biochar	400-600	7.05	0.05	7.08	0.07	241	241
473	Acid	Straw biochar	400-600	7.05	0.05	7.15	0.03	241	241
473	Acid	Straw biochar	400-600	7.06	0.02	7.06	0.01	241	241
473	Acid	Straw biochar	400-600	7.06	0.02	7.13	0.03	241	241
473	Acid	Straw biochar	400-600	5.77	0.01	5.83	0.06	241	241
473	Acid	Straw biochar	400-600	5.77	0.01	5.86	0.01	241	241
473	Acid	Straw biochar	400-600	5.68	0.02	5.76	0.04	241	241
473	Acid	Straw biochar	400-600	5.68	0.02	5.85	0.01	241	241
474	Acid	Straw biochar	400-600	6.12	0.612	6.43	0.643	241	241
474	Acid	Straw biochar	400-600	6.12	0.612	6.38	0.638	241	241
474	Acid	Straw biochar	400-600	6.12	0.612	6.35	0.635	241	241
474	Acid	Straw biochar	400-600	6.11	0.611	6.62	0.662	241	241
474	Acid	Straw biochar	400-600	6.11	0.611	6.55	0.655	241	241
474	Acid	Straw biochar	400-600	6.11	0.611	6.6	0.66	241	241
474	Acid	Straw biochar	400-600	6.17	0.617	6.56	0.656	241	241
474	Acid	Straw biochar	400-600	6.17	0.617	6.6	0.66	241	241
474	Acid	Straw biochar	400-600	6.17	0.617	6.61	0.661	241	241
482	Acid	Straw biochar	400-600	6.03	0.06928	6.2	0.10392	241	241
482	Acid	Straw biochar	400-600	6.03	0.06928	6.35	0.10392	241	241
482	Acid	Straw biochar	400-600	6.03	0.06928	7.02	0.13856	241	241
482	Acid	Straw biochar	400-600	6.01	0.0866	6.19	0.03464	241	241
482	Acid	Straw biochar	400-600	6.01	0.0866	6.34	0.05196	241	241
482	Acid	Straw biochar	400-600	6.01	0.0866	6.73	0.22516	241	241
523	Acid	Straw biochar	400-600	6.88	0.14	7.58	0.02	241	241
559	Acid	Straw biochar	400-600	4.55	0	4.92	0.29444	241	241
559	Acid	Straw biochar	400-600	4.55	0	4.7	0.06928	241	241
565	Acid	Straw biochar	400-600	5.68	0.03464	5.79	0.06928	241	241
565	Acid	Straw biochar	400-600	5.71	0.03464	5.83	0.01732	241	241
87	Acid	Straw biochar	600-800	4.61	0.11	4.89	0.04	78	78
87	Acid	Straw biochar	600-800	5.07	0.15	5.44	0.07	78	78
87	Acid	Straw biochar	600-800	5.07	0.15	5.11	0.03	78	78
134	Acid	Straw biochar	600-800	3.95	0.01732	5.17	0.03464	78	78
134	Acid	Straw biochar	600-800	3.95	0.01732	4.8	0.01732	78	78
134	Acid	Straw biochar	600-800	3.95	0.01732	5.2	0.01732	78	78
134	Acid	Straw biochar	600-800	3.95	0.01732	5.22	0.01732	78	78
155	Acid	Straw biochar	600-800	5.01	0.501	5.23	0.523	78	78
155	Acid	Straw biochar	600-800	5.09	0.509	5.11	0.511	78	78
155	Acid	Straw biochar	600-800	5.04	0.504	5.16	0.516	78	78
231	Acid	Straw biochar	600-800	6.01	0.033	6.19	0.063	78	78
231	Acid	Straw biochar	600-800	5.06	0.038	5.16	0.097	78	78
276	Acid	Straw biochar	600-800	5.75	0.02	5.82	0.03	78	78
276	Acid	Straw biochar	600-800	5.75	0.02	5.89	0.02	78	78
353	Acid	Straw biochar	600-800	5.11	0.06928	5.15	0	78	78
353	Acid	Straw biochar	600-800	5.11	0.06928	5.31	0	78	78
353	Acid	Straw biochar	600-800	5.06	0.506	5.15	0.515	78	78
353	Acid	Straw biochar	600-800	5.06	0.506	5.1	0.51	78	78
396	Acid	Straw biochar	600-800	5.21	0.14	6.82	0.18	78	78
413	Acid	Straw biochar	600-800	6.19	0.01	6.25	0.07	78	78
413	Acid	Straw biochar	600-800	6.19	0.01	6.3	0.06	78	78
413	Acid	Straw biochar	600-800	6.19	0.01	6.47	0.03	78	78
413	Acid	Straw biochar	600-800	6.19	0.01	6.8	0.05	78	78
413	Acid	Straw biochar	600-800	6.19	0.02	6.48	0.02	78	78
413	Acid	Straw biochar	600-800	6.19	0.02	6.69	0.09	78	78
413	Acid	Straw biochar	600-800	6.19	0.02	6.98	0.01	78	78
413	Acid	Straw biochar	600-800	6.19	0.02	7.8	0.04	78	78
413	Acid	Straw biochar	600-800	6.31	0.06	6.31	0.06	78	78
413	Acid	Straw biochar	600-800	6.31	0.06	6.32	0.06	78	78
413	Acid	Straw biochar	600-800	6.31	0.06	6.38	0.02	78	78
413	Acid	Straw biochar	600-800	6.31	0.06	6.55	0.06	78	78
413	Acid	Straw biochar	600-800	6.19	0.11	6.36	0.03	78	78
413	Acid	Straw biochar	600-800	6.19	0.11	6.48	0.06	78	78
413	Acid	Straw biochar	600-800	6.19	0.11	6.8	0.04	78	78
413	Acid	Straw biochar	600-800	6.19	0.11	7.51	0.08	78	78
413	Acid	Straw biochar	600-800	6.22	0.07	6.35	0.04	78	78
413	Acid	Straw biochar	600-800	6.22	0.07	6.41	0.04	78	78
413	Acid	Straw biochar	600-800	6.22	0.07	6.51	0.05	78	78
413	Acid	Straw biochar	600-800	6.22	0.07	6.84	0.12	78	78
413	Acid	Straw biochar	600-800	6.32	0.04	6.53	0.05	78	78
413	Acid	Straw biochar	600-800	6.32	0.04	6.75	0.06	78	78
413	Acid	Straw biochar	600-800	6.32	0.04	7.02	0.04	78	78
413	Acid	Straw biochar	600-800	6.32	0.04	7.83	0.02	78	78
413	Acid	Straw biochar	600-800	6.32	0.06	6.35	0.04	78	78
413	Acid	Straw biochar	600-800	6.32	0.06	6.41	0.08	78	78
413	Acid	Straw biochar	600-800	6.32	0.06	6.45	0.07	78	78
413	Acid	Straw biochar	600-800	6.32	0.06	6.59	0.01	78	78
413	Acid	Straw biochar	600-800	6.39	0.07	6.52	0.04	78	78
413	Acid	Straw biochar	600-800	6.39	0.07	6.82	0.08	78	78
413	Acid	Straw biochar	600-800	6.39	0.07	7.54	0.09	78	78
413	Acid	Straw biochar	600-800	6.24	0.08	6.28	0.11	78	78
413	Acid	Straw biochar	600-800	6.24	0.08	6.38	0.08	78	78
413	Acid	Straw biochar	600-800	6.24	0.08	6.51	0.08	78	78
413	Acid	Straw biochar	600-800	6.24	0.08	6.87	0.15	78	78
413	Acid	Straw biochar	600-800	6.35	0.05	6.54	0.05	78	78
413	Acid	Straw biochar	600-800	6.35	0.05	6.75	0.04	78	78
413	Acid	Straw biochar	600-800	6.35	0.05	7.01	0.01	78	78
413	Acid	Straw biochar	600-800	6.35	0.05	7.89	0.04	78	78
413	Acid	Straw biochar	600-800	6.31	0.08	6.33	0.05	78	78
413	Acid	Straw biochar	600-800	6.31	0.08	6.38	0.01	78	78
413	Acid	Straw biochar	600-800	6.31	0.08	6.58	0.03	78	78
413	Acid	Straw biochar	600-800	6.27	0.05	6.35	0.06	78	78
413	Acid	Straw biochar	600-800	6.27	0.05	6.44	0.06	78	78
413	Acid	Straw biochar	600-800	6.27	0.05	6.81	0.07	78	78
413	Acid	Straw biochar	600-800	6.27	0.05	7.59	0.09	78	78
68	Neutral	Straw biochar	400-600	6.53	0.11	6.75	0.08	27	27
68	Neutral	Straw biochar	400-600	6.53	0.11	6.77	0.18	27	27
68	Neutral	Straw biochar	400-600	6.53	0.11	6.77	0.12	27	27
68	Neutral	Straw biochar	400-600	6.53	0.04	6.73	0.21	27	27
68	Neutral	Straw biochar	400-600	6.53	0.04	6.77	0.05	27	27
68	Neutral	Straw biochar	400-600	6.53	0.04	6.89	0.11	27	27
111	Neutral	Straw biochar	400-600	6.67	0.03	6.74	0.03	27	27
111	Neutral	Straw biochar	400-600	6.64	0.01	6.71	0.05	27	27
111	Neutral	Straw biochar	400-600	6.62	0.03	6.69	0.02	27	27
111	Neutral	Straw biochar	400-600	6.71	0.04	6.76	0.02	27	27
111	Neutral	Straw biochar	400-600	6.72	0.01	6.75	0.04	27	27
111	Neutral	Straw biochar	400-600	6.72	0.02	6.75	0.01	27	27
301	Neutral	Straw biochar	400-600	6.69	0.13856	7.08	0.06928	27	27
301	Neutral	Straw biochar	400-600	6.69	0.13856	7.14	0.06928	27	27
301	Neutral	Straw biochar	400-600	6.69	0.13856	7.17	0.10392	27	27
445	Neutral	Straw biochar	400-600	6.38	0.638	6.56	0.656	27	27
445	Neutral	Straw biochar	400-600	6.38	0.638	7.12	0.712	27	27
445	Neutral	Straw biochar	400-600	6.38	0.638	7.72	0.772	27	27
494	Neutral	Straw biochar	400-600	6.84	0.06928	6.89	0.0866	27	27
494	Neutral	Straw biochar	400-600	6.84	0.06928	6.98	0.05196	27	27
494	Neutral	Straw biochar	400-600	6.84	0.06928	6.97	0.01732	27	27
494	Neutral	Straw biochar	400-600	6.96	0.06928	7	0.10392	27	27
494	Neutral	Straw biochar	400-600	6.96	0.06928	7.05	0.03464	27	27
494	Neutral	Straw biochar	400-600	6.96	0.06928	7.1	0.06928	27	27
508	Neutral	Straw biochar	400-600	6.38	0.638	6.56	0.656	27	27
508	Neutral	Straw biochar	400-600	6.38	0.638	7.12	0.712	27	27
508	Neutral	Straw biochar	400-600	6.38	0.638	7.72	0.772	27	27
370	Neutral	Straw biochar	600-800	7.31	0.35	7.61	0.32	8	8
370	Neutral	Straw biochar	600-800	7.31	0.35	7.81	0.15	8	8
370	Neutral	Straw biochar	600-800	7.31	0.35	8.06	0.1	8	8
370	Neutral	Straw biochar	600-800	7.31	0.35	8.18	0.15	8	8
370	Neutral	Straw biochar	600-800	7.24	0.1	7.46	0.03	8	8
370	Neutral	Straw biochar	600-800	7.24	0.1	7.51	0.23	8	8
370	Neutral	Straw biochar	600-800	7.24	0.1	7.49	0.05	8	8
370	Neutral	Straw biochar	600-800	7.24	0.1	8.03	0.1	8	8
66	Alkaline	Straw biochar	200-400	8.01	0.01	8.07	0.04	10	10
66	Alkaline	Straw biochar	200-400	8.01	0.01	8.09	0.05	10	10
91	Alkaline	Straw biochar	200-400	8.28	0.05196	7.93	0.41568	10	10
91	Alkaline	Straw biochar	200-400	8.28	0.05196	8.14	0.05196	10	10
91	Alkaline	Straw biochar	200-400	8.28	0.05196	8.15	0.03464	10	10
146	Alkaline	Straw biochar	200-400	8.08	0.808	7.88	0.788	10	10
146	Alkaline	Straw biochar	200-400	8.08	0.808	7.86	0.786	10	10
146	Alkaline	Straw biochar	200-400	8.08	0.808	7.85	0.785	10	10
146	Alkaline	Straw biochar	200-400	8.08	0.808	8.05	0.805	10	10
146	Alkaline	Straw biochar	200-400	8.08	0.808	7.99	0.799	10	10
32	Alkaline	Straw biochar	400-600	7.87	0.11	7.91	0.07	90	90
32	Alkaline	Straw biochar	400-600	7.87	0.11	7.79	0.18	90	90
32	Alkaline	Straw biochar	400-600	8.01	0.08	8.15	0.18	90	90
32	Alkaline	Straw biochar	400-600	8.01	0.08	7.99	0.08	90	90
48	Alkaline	Straw biochar	400-600	8.43	0.03	8.39	0.03	90	90
48	Alkaline	Straw biochar	400-600	8.43	0.03	8.43	0.01	90	90
48	Alkaline	Straw biochar	400-600	8.2	0.02	8.23	0.05	90	90
48	Alkaline	Straw biochar	400-600	8.2	0.02	8.16	0.03	90	90
61	Alkaline	Straw biochar	400-600	8.06	0.05	8.15	0.05	90	90
61	Alkaline	Straw biochar	400-600	8.06	0.05	8.17	0.07	90	90
61	Alkaline	Straw biochar	400-600	8.06	0.05	8.18	0.03	90	90
162	Alkaline	Straw biochar	400-600	8.44	0.844	8.65	0.865	90	90
162	Alkaline	Straw biochar	400-600	8.44	0.844	8.68	0.868	90	90
162	Alkaline	Straw biochar	400-600	8.44	0.844	8.7	0.87	90	90
162	Alkaline	Straw biochar	400-600	8.41	0.841	8.54	0.854	90	90
162	Alkaline	Straw biochar	400-600	8.41	0.841	8.56	0.856	90	90
162	Alkaline	Straw biochar	400-600	8.41	0.841	8.56	0.856	90	90
162	Alkaline	Straw biochar	400-600	8.31	0.831	8.4	0.84	90	90
162	Alkaline	Straw biochar	400-600	8.31	0.831	8.43	0.843	90	90
162	Alkaline	Straw biochar	400-600	8.31	0.831	8.45	0.845	90	90
162	Alkaline	Straw biochar	400-600	8.46	0.846	8.69	0.869	90	90
162	Alkaline	Straw biochar	400-600	8.46	0.846	8.71	0.871	90	90
162	Alkaline	Straw biochar	400-600	8.46	0.846	8.73	0.873	90	90
162	Alkaline	Straw biochar	400-600	8.42	0.842	8.55	0.855	90	90
162	Alkaline	Straw biochar	400-600	8.42	0.842	8.56	0.856	90	90
162	Alkaline	Straw biochar	400-600	8.42	0.842	8.58	0.858	90	90
162	Alkaline	Straw biochar	400-600	8.33	0.833	8.42	0.842	90	90
162	Alkaline	Straw biochar	400-600	8.33	0.833	8.44	0.844	90	90
162	Alkaline	Straw biochar	400-600	8.33	0.833	8.46	0.846	90	90
240	Alkaline	Straw biochar	400-600	7.08	0.2598	7.23	0.3464	90	90
240	Alkaline	Straw biochar	400-600	7.08	0.2598	7.22	0.2598	90	90
240	Alkaline	Straw biochar	400-600	7.08	0.2598	7.41	0.48496	90	90
240	Alkaline	Straw biochar	400-600	7.66	0.2598	7.7	0.2598	90	90
240	Alkaline	Straw biochar	400-600	7.66	0.2598	7.81	0.39836	90	90
240	Alkaline	Straw biochar	400-600	7.66	0.2598	7.94	0.79672	90	90
241	Alkaline	Straw biochar	400-600	8.63	0.06928	8.89	0.03464	90	90
303	Alkaline	Straw biochar	400-600	8.03	0.803	8.36	0.836	90	90
303	Alkaline	Straw biochar	400-600	8.3	0.83	8.24	0.824	90	90
303	Alkaline	Straw biochar	400-600	8.23	0.823	8.39	0.839	90	90
303	Alkaline	Straw biochar	400-600	8.3	0.83	8.24	0.824	90	90
342	Alkaline	Straw biochar	400-600	8.73	0.03464	8.78	0.15588	90	90
342	Alkaline	Straw biochar	400-600	8.75	0.36372	8.68	0.10392	90	90
342	Alkaline	Straw biochar	400-600	8.36	0.2598	8.52	0.3464	90	90
400	Alkaline	Straw biochar	400-600	8.46	0.01	8.47	0.04	90	90
400	Alkaline	Straw biochar	400-600	8.42	0.01	8.41	0.03	90	90
400	Alkaline	Straw biochar	400-600	8.39	0.02	8.37	0.02	90	90
400	Alkaline	Straw biochar	400-600	8.37	0	8.38	0.04	90	90
402	Alkaline	Straw biochar	400-600	8.16	0.01	8.16	0.06	90	90
402	Alkaline	Straw biochar	400-600	8.16	0.01	8.19	0.06	90	90
402	Alkaline	Straw biochar	400-600	8.16	0.01	8.15	0	90	90
402	Alkaline	Straw biochar	400-600	8.39	0.02	8.43	0.08	90	90
402	Alkaline	Straw biochar	400-600	8.39	0.02	8.44	0.03	90	90
402	Alkaline	Straw biochar	400-600	8.39	0.02	8.37	0.02	90	90
441	Alkaline	Straw biochar	400-600	8.4	0.01732	8.32	0.01732	90	90
441	Alkaline	Straw biochar	400-600	8.38	0.01732	8.32	0.01732	90	90
442	Alkaline	Straw biochar	400-600	8.25	0.06	8.23	0.04	90	90
442	Alkaline	Straw biochar	400-600	8.25	0.06	8.18	0.04	90	90
442	Alkaline	Straw biochar	400-600	8.25	0.06	8.01	0.06	90	90
462	Alkaline	Straw biochar	400-600	8.21	0.02	8.32	0.02	90	90
462	Alkaline	Straw biochar	400-600	8.21	0.02	8.35	0.04	90	90
462	Alkaline	Straw biochar	400-600	8.21	0.02	8.35	0.02	90	90
462	Alkaline	Straw biochar	400-600	8.21	0.02	8.37	0.04	90	90
462	Alkaline	Straw biochar	400-600	8.22	0.03	8.18	8.2	90	90
462	Alkaline	Straw biochar	400-600	8.22	0.03	8.23	0.04	90	90
462	Alkaline	Straw biochar	400-600	8.22	0.03	8.21	8.25	90	90
462	Alkaline	Straw biochar	400-600	8.22	0.03	8.19	8.21	90	90
462	Alkaline	Straw biochar	400-600	8.04	0.03	8.1	0.07	90	90
462	Alkaline	Straw biochar	400-600	8.04	0.03	8.08	0.07	90	90
462	Alkaline	Straw biochar	400-600	8.04	0.03	8.05	0.01	90	90
462	Alkaline	Straw biochar	400-600	8.04	0.03	8.05	0.07	90	90
463	Alkaline	Straw biochar	400-600	7.66	0.20784	7.7	0.13856	90	90
463	Alkaline	Straw biochar	400-600	7.66	0.20784	7.81	0.20784	90	90
463	Alkaline	Straw biochar	400-600	7.66	0.20784	7.93	0.793	90	90
501	Alkaline	Straw biochar	400-600	8.19	0.12124	8.3	0.10392	90	90
501	Alkaline	Straw biochar	400-600	8.19	0.12124	8.26	0.01732	90	90
501	Alkaline	Straw biochar	400-600	8.19	0.12124	8.33	0.06928	90	90
501	Alkaline	Straw biochar	400-600	8.1	0.06928	8.08	0.0866	90	90
501	Alkaline	Straw biochar	400-600	8.1	0.06928	8.1	0.10392	90	90
501	Alkaline	Straw biochar	400-600	8.1	0.06928	8.15	0.03464	90	90
501	Alkaline	Straw biochar	400-600	8.02	0.24248	8.2	0.29444	90	90
501	Alkaline	Straw biochar	400-600	8.02	0.24248	8.21	0.2598	90	90
501	Alkaline	Straw biochar	400-600	8.02	0.24248	8.27	0.12124	90	90
501	Alkaline	Straw biochar	400-600	8.27	0.06928	8.24	0.06928	90	90
501	Alkaline	Straw biochar	400-600	8.27	0.06928	8.31	0.29444	90	90
501	Alkaline	Straw biochar	400-600	8.27	0.06928	8.35	0.20784	90	90
501	Alkaline	Straw biochar	400-600	8.37	0.06928	8.42	0.06928	90	90
501	Alkaline	Straw biochar	400-600	8.37	0.06928	8.49	0.0866	90	90
501	Alkaline	Straw biochar	400-600	8.37	0.06928	8.49	0.12124	90	90
565	Alkaline	Straw biochar	400-600	7.88	0.01732	8.3	0	90	90
565	Alkaline	Straw biochar	400-600	8.08	0.01732	8.42	0.01732	90	90
419	Alkaline	Straw biochar	600-800	8.2	0.82	8	0.8	2	2
419	Alkaline	Straw biochar	600-800	8	0.8	7.8	0.78	2	2
13	Acid	Wood biochar	400-600	6.4	0.13416	7.2	0.1118	35	35
13	Acid	Wood biochar	400-600	6.4	0.13416	7.58	0.1118	35	35
13	Acid	Wood biochar	400-600	6.4	0.13416	7.8	0.06708	35	35
13	Acid	Wood biochar	400-600	6.4	0.13416	7.11	0.08944	35	35
13	Acid	Wood biochar	400-600	6.4	0.13416	7.48	0.15652	35	35
13	Acid	Wood biochar	400-600	6.4	0.13416	7.69	0.04472	35	35
13	Acid	Wood biochar	400-600	6.4	0.13416	7.24	0.04472	35	35
13	Acid	Wood biochar	400-600	6.4	0.13416	7.53	0.1118	35	35
13	Acid	Wood biochar	400-600	6.4	0.13416	7.8	0.04472	35	35
128	Acid	Wood biochar	400-600	5.71	0.05196	5.96	0.03464	35	35
128	Acid	Wood biochar	400-600	5.71	0.05196	6.17	0.0866	35	35
128	Acid	Wood biochar	400-600	5.71	0.05196	6.33	0.03464	35	35
509	Acid	Wood biochar	400-600	5.99	0.10392	6.07	0.05196	35	35
509	Acid	Wood biochar	400-600	5.99	0.10392	6.22	0.06928	35	35
509	Acid	Wood biochar	400-600	5.99	0.10392	6.66	0.10392	35	35
509	Acid	Wood biochar	400-600	5.69	0.13856	5.94	0.06928	35	35
509	Acid	Wood biochar	400-600	5.69	0.13856	6.3	0.06928	35	35
509	Acid	Wood biochar	400-600	5.69	0.13856	6.7	0.05196	35	35
565	Acid	Wood biochar	400-600	5.68	0.03464	5.79	0.06928	35	35
565	Acid	Wood biochar	400-600	5.71	0.03464	5.79	0.03464	35	35
577	Acid	Wood biochar	400-600	6.07	0	6.43	0	35	35
577	Acid	Wood biochar	400-600	6.07	0	6.49	0.15588	35	35
577	Acid	Wood biochar	400-600	6.27	0.05196	6.39	0.06928	35	35
577	Acid	Wood biochar	400-600	6.27	0.05196	6.78	0	35	35
577	Acid	Wood biochar	400-600	6.78	0.05196	6.33	0.05196	35	35
577	Acid	Wood biochar	400-600	6.78	0.05196	7.04	0.06928	35	35
577	Acid	Wood biochar	400-600	5.98	0.15588	6.01	0.3464	35	35
577	Acid	Wood biochar	400-600	5.69	0.15588	5.98	0.10392	35	35
577	Acid	Wood biochar	400-600	5.69	0.15588	5.98	0.05196	35	35
577	Acid	Wood biochar	400-600	6.53	0.05196	6.82	0.10392	35	35
577	Acid	Wood biochar	400-600	6.53	0.05196	7.26	0.06928	35	35
577	Acid	Wood biochar	400-600	6.59	0.05196	6.69	0.05196	35	35
577	Acid	Wood biochar	400-600	6.59	0.05196	6.66	0.05196	35	35
577	Acid	Wood biochar	400-600	6.3	0.06928	6.75	0.05196	35	35
577	Acid	Wood biochar	400-600	6.3	0.06928	6.5	0.05196	35	35
96	Acid	Wood biochar	600-800	4.3	0.02	4.74	0.06	5	5
96	Acid	Wood biochar	600-800	4.3	0.02	5.2	0.01	5	5
219	Acid	Wood biochar	600-800	6.42	0.05	6.68	0.12	5	5
231	Acid	Wood biochar	600-800	6.01	0.033	6.16	0.066	5	5
231	Acid	Wood biochar	600-800	5.06	0.038	5.13	0.068	5	5
36	Alkaline	Wood biochar	400-600	7.72	0.03464	7.73	0.03464	12	12
36	Alkaline	Wood biochar	400-600	7.72	0.03464	7.76	0.05196	12	12
36	Alkaline	Wood biochar	400-600	7.72	0.03464	7.79	0.05196	12	12
36	Alkaline	Wood biochar	400-600	7.72	0.03464	7.83	0.05196	12	12
128	Alkaline	Wood biochar	400-600	8	0.03464	8.07	0.03464	12	12
128	Alkaline	Wood biochar	400-600	8	0.03464	8.11	0.06928	12	12
128	Alkaline	Wood biochar	400-600	8	0.03464	8.13	0.03464	12	12
175	Alkaline	Wood biochar	400-600	8.25	0.06	8.18	0.03	12	12
175	Alkaline	Wood biochar	400-600	8.25	0.06	8.11	0.04	12	12
175	Alkaline	Wood biochar	400-600	8.25	0.06	7.99	0.01	12	12
565	Alkaline	Wood biochar	400-600	7.88	0.01732	8.19	0	12	12
565	Alkaline	Wood biochar	400-600	8.08	0.01732	8.23	0.01732	12	12
394	Alkaline	Wood biochar	600-800	7.99	0.05196	7.62	0.10392	5	5
394	Alkaline	Wood biochar	600-800	8.02	0.06928	7.95	0.06928	5	5
456	Alkaline	Wood biochar	600-800	8.85	0.885	8.76	0.876	5	5
456	Alkaline	Wood biochar	600-800	8.85	0.885	8.81	0.881	5	5
456	Alkaline	Wood biochar	600-800	8.85	0.885	8.91	0.891	5	5
136	Acid	Other biochar	200-400	4.08	0.408	4.35	0.435	2	2
136	Acid	Other biochar	200-400	4.08	0.408	4.55	0.435	2	2
53	Acid	Other biochar	400-600	6.51	0.0866	6.53	0.12124	6	6
53	Acid	Other biochar	400-600	6.51	0.0866	6.53	0.13856	6	6
53	Acid	Other biochar	400-600	6.51	0.0866	6.59	0.0866	6	6
53	Acid	Other biochar	400-600	6.51	0.0866	6.62	0.12124	6	6
211	Acid	Other biochar	400-600	4.74	0.11	5.88	0.15	6	6
211	Acid	Other biochar	400-600	4.74	0.11	6.56	0.25	6	6
232	Neutral	Other biochar	600-800	7.17	0.717	7.35	0.735	9	9
232	Neutral	Other biochar	600-800	7.17	0.717	7.4	0.74	9	9
232	Neutral	Other biochar	600-800	7.17	0.717	7.43	0.743	9	9
232	Neutral	Other biochar	600-800	7.17	0.717	7.34	0.734	9	9
232	Neutral	Other biochar	600-800	7.17	0.717	7.55	0.755	9	9
232	Neutral	Other biochar	600-800	7.17	0.717	7.65	0.765	9	9
232	Neutral	Other biochar	600-800	7.17	0.717	7.63	0.763	9	9
232	Neutral	Other biochar	600-800	7.17	0.717	7.7	0.77	9	9
232	Neutral	Other biochar	600-800	7.17	0.717	7.79	0.779	9	9
489	Alkaline	Other biochar	200-400	7.87	0.01732	8.13	0.06928	12	12
489	Alkaline	Other biochar	200-400	7.87	0.01732	8.21	0.05196	12	12
489	Alkaline	Other biochar	200-400	7.87	0.01732	8.39	0.05196	12	12
489	Alkaline	Other biochar	200-400	7.87	0.01732	8.51	0.06928	12	12
489	Alkaline	Other biochar	200-400	7.94	0.12124	8.2	0.10392	12	12
489	Alkaline	Other biochar	200-400	7.94	0.12124	8.23	0.03464	12	12
489	Alkaline	Other biochar	200-400	7.94	0.12124	8.33	0.05196	12	12
489	Alkaline	Other biochar	200-400	7.94	0.12124	8.5	0.06928	12	12
489	Alkaline	Other biochar	200-400	7.95	0.13856	8.24	0.06928	12	12
489	Alkaline	Other biochar	200-400	7.95	0.13856	8.27	0.10392	12	12
489	Alkaline	Other biochar	200-400	7.95	0.13856	8.38	0.03464	12	12
489	Alkaline	Other biochar	200-400	7.95	0.13856	8.47	0.01732	12	12

## Sheet: Biochar types and application
Num.	Soil pH	Biochar types	Biochar application	Control pH	Control SD	Experiment pH	Experiment SD	Sample size of control group	Sample size of experiment group
16	Acid	Straw biochar	＜1%	4.46	0.09	5.1	0.35	153	153
16	Acid	Straw biochar	＜1%	4.46	0.09	5	0.01	153	153
16	Acid	Straw biochar	＜1%	4.41	0.04	4.53	0.39	153	153
16	Acid	Straw biochar	＜1%	4.41	0.04	4.73	0.19	153	153
16	Acid	Straw biochar	＜1%	4.63	0.01	4.69	0.23	153	153
16	Acid	Straw biochar	＜1%	4.63	0.01	4.67	0.17	153	153
16	Acid	Straw biochar	＜1%	4.59	0.2	4.66	0.36	153	153
17	Acid	Straw biochar	＜1%	6.56	0.056	6.71	0.06	153	153
22	Acid	Straw biochar	＜1%	5.07	0.507	5.07	0.507	153	153
22	Acid	Straw biochar	＜1%	5.07	0.507	5.29	0.529	153	153
22	Acid	Straw biochar	＜1%	5.07	0.507	5.14	0.514	153	153
22	Acid	Straw biochar	＜1%	4.95	0.495	5.13	0.272	153	153
37	Acid	Straw biochar	＜1%	5.3	0.03	5.42	0.07	153	153
48	Acid	Straw biochar	＜1%	4.76	0.07	4.8	0.04	153	153
48	Acid	Straw biochar	＜1%	4.76	0.07	5.05	0.08	153	153
48	Acid	Straw biochar	＜1%	4.81	0.02	4.83	0.06	153	153
48	Acid	Straw biochar	＜1%	4.81	0.02	5.92	0.05	153	153
50	Acid	Straw biochar	＜1%	5.27	0.0866	5.71	0.38104	153	153
50	Acid	Straw biochar	＜1%	5.27	0.0866	6.01	0.32908	153	153
50	Acid	Straw biochar	＜1%	5.27	0.0866	6.12	0.12124	153	153
50	Acid	Straw biochar	＜1%	6.34	0.41568	6.79	0.12124	153	153
50	Acid	Straw biochar	＜1%	6.34	0.41568	6.97	0.57156	153	153
50	Acid	Straw biochar	＜1%	6.34	0.41568	6.99	0.41568	153	153
56	Acid	Straw biochar	＜1%	4.61	0.1732	4.65	0.22516	153	153
56	Acid	Straw biochar	＜1%	4.61	0.1732	4.82	0.12124	153	153
56	Acid	Straw biochar	＜1%	4.61	0.1732	4.86	0.1732	153	153
56	Acid	Straw biochar	＜1%	4.61	0.1732	5.22	0.24248	153	153
60	Acid	Straw biochar	＜1%	5.46	0.546	6.69	0.669	153	153
60	Acid	Straw biochar	＜1%	5.17	0.517	6.64	0.664	153	153
60	Acid	Straw biochar	＜1%	4.97	0.497	6.27	0.627	153	153
79	Acid	Straw biochar	＜1%	5.4	0.3	6	0.2	153	153
79	Acid	Straw biochar	＜1%	5.4	0.2	6.6	0.1	153	153
79	Acid	Straw biochar	＜1%	5.3	0.2	6.2	0.4	153	153
79	Acid	Straw biochar	＜1%	5.2	0	5.7	0.5	153	153
79	Acid	Straw biochar	＜1%	5.2	0.2	6	0.4	153	153
79	Acid	Straw biochar	＜1%	5.5	0.6	5.8	0.3	153	153
86	Acid	Straw biochar	＜1%	3.9	0.02	4	0.05	153	153
112	Acid	Straw biochar	＜1%	4.4	0.1732	4.6	0.19052	153	153
112	Acid	Straw biochar	＜1%	4.4	0.19052	4.69	0.1732	153	153
112	Acid	Straw biochar	＜1%	4.2	0.1732	4.39	0.19052	153	153
112	Acid	Straw biochar	＜1%	4.14	0.15588	4.32	0.1732	153	153
140	Acid	Straw biochar	＜1%	5.7	0.01	5.78	0.02	153	153
148	Acid	Straw biochar	＜1%	6.64	0.02	6.67	0.03	153	153
148	Acid	Straw biochar	＜1%	6.64	0.02	6.82	0.02	153	153
148	Acid	Straw biochar	＜1%	6.64	0.02	6.94	0.02	153	153
148	Acid	Straw biochar	＜1%	6.64	0.02	7.09	0.01	153	153
155	Acid	Straw biochar	＜1%	5.01	0.501	5.23	0.523	153	153
155	Acid	Straw biochar	＜1%	5.09	0.509	5.11	0.511	153	153
155	Acid	Straw biochar	＜1%	5.04	0.504	5.16	0.516	153	153
161	Acid	Straw biochar	＜1%	5.26	0.12124	5.43	0.19052	153	153
161	Acid	Straw biochar	＜1%	5.26	0.12124	5.76	0.29444	153	153
161	Acid	Straw biochar	＜1%	5.74	0.24248	5.97	0.06928	153	153
161	Acid	Straw biochar	＜1%	5.74	0.24248	6.4	0.13856	153	153
209	Acid	Straw biochar	＜1%	3.47	0.347	3.74	0.374	153	153
226	Acid	Straw biochar	＜1%	5.63	0.563	5.84	0.584	153	153
226	Acid	Straw biochar	＜1%	5.38	0.538	5.49	0.549	153	153
231	Acid	Straw biochar	＜1%	6.01	0.033	6.19	0.063	153	153
231	Acid	Straw biochar	＜1%	5.06	0.038	5.16	0.097	153	153
263	Acid	Straw biochar	＜1%	4.8	0.13856	4.97	0.10392	153	153
263	Acid	Straw biochar	＜1%	4.8	0.13856	4.97	0.24248	153	153
263	Acid	Straw biochar	＜1%	4.8	0.13856	5.12	0.31176	153	153
263	Acid	Straw biochar	＜1%	4.8	0.13856	5.04	0.19052	153	153
263	Acid	Straw biochar	＜1%	4.81	0.06928	4.81	0.20784	153	153
263	Acid	Straw biochar	＜1%	4.81	0.06928	4.87	0.19052	153	153
263	Acid	Straw biochar	＜1%	4.81	0.06928	4.91	0.12124	153	153
265	Acid	Straw biochar	＜1%	4.79	0.09	4.84	0.07	153	153
265	Acid	Straw biochar	＜1%	4.79	0.09	4.88	0.07	153	153
265	Acid	Straw biochar	＜1%	4.79	0.09	5.02	0.08	153	153
265	Acid	Straw biochar	＜1%	4.79	0.09	5.19	0.07	153	153
265	Acid	Straw biochar	＜1%	4.65	0.08	4.76	0.05	153	153
265	Acid	Straw biochar	＜1%	4.65	0.08	4.88	0.08	153	153
265	Acid	Straw biochar	＜1%	4.65	0.08	4.8	0.08	153	153
265	Acid	Straw biochar	＜1%	4.65	0.08	4.91	0.06	153	153
265	Acid	Straw biochar	＜1%	4.63	0.05	4.75	0.08	153	153
265	Acid	Straw biochar	＜1%	4.63	0.05	4.73	0.07	153	153
265	Acid	Straw biochar	＜1%	4.63	0.05	4.8	0.07	153	153
265	Acid	Straw biochar	＜1%	4.63	0.05	4.88	0.05	153	153
265	Acid	Straw biochar	＜1%	4.57	0.07	4.6	0.06	153	153
265	Acid	Straw biochar	＜1%	4.57	0.07	4.76	0.07	153	153
265	Acid	Straw biochar	＜1%	4.57	0.07	4.73	0.07	153	153
265	Acid	Straw biochar	＜1%	4.57	0.07	4.79	0.04	153	153
265	Acid	Straw biochar	＜1%	4.34	0.04	4.36	0.07	153	153
265	Acid	Straw biochar	＜1%	4.34	0.04	4.36	0.05	153	153
265	Acid	Straw biochar	＜1%	4.34	0.04	4.58	0.06	153	153
265	Acid	Straw biochar	＜1%	4.34	0.04	4.52	0.04	153	153
276	Acid	Straw biochar	＜1%	5.75	0.02	5.82	0.03	153	153
283	Acid	Straw biochar	＜1%	6.07	0.12	6.07	0.12	153	153
283	Acid	Straw biochar	＜1%	6.07	0.12	6.19	0.08	153	153
283	Acid	Straw biochar	＜1%	5.66	0.04	6.09	0.08	153	153
283	Acid	Straw biochar	＜1%	5.66	0.04	6.21	0.12	153	153
326	Acid	Straw biochar	＜1%	5.93	0.6062	6.11	0.15588	153	153
332	Acid	Straw biochar	＜1%	4.88	0.05	4.99	0.13	153	153
332	Acid	Straw biochar	＜1%	6.01	0.06	6.15	0.02	153	153
332	Acid	Straw biochar	＜1%	5.54	0.23	5.89	0.05	153	153
333	Acid	Straw biochar	＜1%	6.09	0.06	6.14	0.07	153	153
342	Acid	Straw biochar	＜1%	5.51	0.05196	6.23	0.15588	153	153
342	Acid	Straw biochar	＜1%	5.42	0.06928	6.5	0.05196	153	153
342	Acid	Straw biochar	＜1%	5.32	0.29444	6.26	0.0866	153	153
353	Acid	Straw biochar	＜1%	5.11	0.06928	5.15	0	153	153
353	Acid	Straw biochar	＜1%	5.06	0.506	5.15	0.515	153	153
392	Acid	Straw biochar	＜1%	4.77	0.477	4.81	0.481	153	153
392	Acid	Straw biochar	＜1%	4.77	0.477	5.05	0.505	153	153
392	Acid	Straw biochar	＜1%	4.6	0.46	4.77	0.477	153	153
392	Acid	Straw biochar	＜1%	4.6	0.46	6.18	0.618	153	153
392	Acid	Straw biochar	＜1%	4.39	0.439	4.53	0.453	153	153
392	Acid	Straw biochar	＜1%	4.39	0.439	6.45	0.645	153	153
392	Acid	Straw biochar	＜1%	4.7	0.47	5.05	0.505	153	153
392	Acid	Straw biochar	＜1%	4.7	0.47	7.28	0.728	153	153
392	Acid	Straw biochar	＜1%	4.12	0.412	4.6	0.46	153	153
392	Acid	Straw biochar	＜1%	4.12	0.412	7.18	0.718	153	153
392	Acid	Straw biochar	＜1%	4.81	0.481	4.84	0.484	153	153
392	Acid	Straw biochar	＜1%	4.81	0.481	5.94	0.594	153	153
392	Acid	Straw biochar	＜1%	5.08	0.508	5.22	0.522	153	153
392	Acid	Straw biochar	＜1%	5.08	0.508	6.76	0.676	153	153
392	Acid	Straw biochar	＜1%	4.91	0.491	6.56	0.656	153	153
392	Acid	Straw biochar	＜1%	4.81	0.481	5.12	0.512	153	153
392	Acid	Straw biochar	＜1%	4.81	0.481	7.31	0.731	153	153
392	Acid	Straw biochar	＜1%	3.78	0.378	4.53	0.453	153	153
392	Acid	Straw biochar	＜1%	3.78	0.378	7.07	0.707	153	153
393	Acid	Straw biochar	＜1%	4.09	0.1732	4.43	0.19052	153	153
413	Acid	Straw biochar	＜1%	6.19	0.01	6.25	0.07	153	153
413	Acid	Straw biochar	＜1%	6.19	0.02	6.48	0.02	153	153
413	Acid	Straw biochar	＜1%	6.31	0.06	6.31	0.06	153	153
413	Acid	Straw biochar	＜1%	6.19	0.11	6.36	0.03	153	153
413	Acid	Straw biochar	＜1%	6.22	0.07	6.35	0.04	153	153
413	Acid	Straw biochar	＜1%	6.32	0.04	6.53	0.05	153	153
413	Acid	Straw biochar	＜1%	6.32	0.06	6.35	0.04	153	153
413	Acid	Straw biochar	＜1%	6.24	0.08	6.28	0.11	153	153
413	Acid	Straw biochar	＜1%	6.35	0.05	6.54	0.05	153	153
413	Acid	Straw biochar	＜1%	6.27	0.05	6.35	0.06	153	153
425	Acid	Straw biochar	＜1%	4.45	0.03464	4.56	0.10392	153	153
425	Acid	Straw biochar	＜1%	4.45	0.03464	4.65	0.0866	153	153
425	Acid	Straw biochar	＜1%	4.45	0.03464	4.78	0.10392	153	153
448	Acid	Straw biochar	＜1%	5.41	0.05196	5.49	0.03464	153	153
468	Acid	Straw biochar	＜1%	5.49	0.02	5.54	0.06	153	153
468	Acid	Straw biochar	＜1%	5.67	0.06	5.75	0.04	153	153
473	Acid	Straw biochar	＜1%	7.05	0.05	7.08	0.07	153	153
473	Acid	Straw biochar	＜1%	7.06	0.02	7.06	0.01	153	153
473	Acid	Straw biochar	＜1%	5.77	0.01	5.83	0.06	153	153
473	Acid	Straw biochar	＜1%	5.68	0.02	5.76	0.04	153	153
474	Acid	Straw biochar	＜1%	6.12	0.612	6.43	0.643	153	153
474	Acid	Straw biochar	＜1%	6.12	0.612	6.38	0.638	153	153
474	Acid	Straw biochar	＜1%	6.12	0.612	6.35	0.635	153	153
474	Acid	Straw biochar	＜1%	6.11	0.611	6.62	0.662	153	153
474	Acid	Straw biochar	＜1%	6.11	0.611	6.55	0.655	153	153
474	Acid	Straw biochar	＜1%	6.11	0.611	6.6	0.66	153	153
474	Acid	Straw biochar	＜1%	6.17	0.617	6.56	0.656	153	153
474	Acid	Straw biochar	＜1%	6.17	0.617	6.6	0.66	153	153
474	Acid	Straw biochar	＜1%	6.17	0.617	6.61	0.661	153	153
482	Acid	Straw biochar	＜1%	6.03	0.06928	6.2	0.10392	153	153
482	Acid	Straw biochar	＜1%	6.03	0.06928	6.35	0.10392	153	153
482	Acid	Straw biochar	＜1%	6.01	0.0866	6.19	0.03464	153	153
482	Acid	Straw biochar	＜1%	6.01	0.0866	6.34	0.05196	153	153
17	Acid	Straw biochar	1%-5%	6.56	0.056	6.87	0.05	157	157
22	Acid	Straw biochar	1%-5%	4.95	0.495	6.81	0.238	157	157
24	Acid	Straw biochar	1%-5%	5.69	0.08	5.93	0.04	157	157
24	Acid	Straw biochar	1%-5%	5.69	0.08	6.38	0.1	157	157
24	Acid	Straw biochar	1%-5%	5.75	0.08	5.92	0.11	157	157
24	Acid	Straw biochar	1%-5%	5.75	0.08	6.35	0.07	157	157
24	Acid	Straw biochar	1%-5%	5.98	0.2	6.31	0.55	157	157
24	Acid	Straw biochar	1%-5%	5.98	0.2	6.45	0.15	157	157
24	Acid	Straw biochar	1%-5%	5.89	0.2	6.1	0.22	157	157
24	Acid	Straw biochar	1%-5%	5.89	0.2	6.4	0.06	157	157
34	Acid	Straw biochar	1%-5%	3.77	0.01	3.88	0.03	157	157
34	Acid	Straw biochar	1%-5%	5.17	0.03	5.32	0.02	157	157
34	Acid	Straw biochar	1%-5%	4.52	0.04	4.83	0.01	157	157
34	Acid	Straw biochar	1%-5%	3.85	0.01	3.96	0.01	157	157
34	Acid	Straw biochar	1%-5%	3.81	0.02	4.05	0.01	157	157
37	Acid	Straw biochar	1%-5%	5.3	0.03	5.61	0.11	157	157
50	Acid	Straw biochar	1%-5%	5.27	0.0866	6.25	0.01732	157	157
50	Acid	Straw biochar	1%-5%	6.34	0.41568	7.23	0.2598	157	157
52	Acid	Straw biochar	1%-5%	5.54	0.24	6.12	0.04	157	157
52	Acid	Straw biochar	1%-5%	5.49	0.2	6.03	0.17	157	157
52	Acid	Straw biochar	1%-5%	5.37	0.14	5.72	0.06	157	157
52	Acid	Straw biochar	1%-5%	5.42	0.02	5.69	0.27	157	157
52	Acid	Straw biochar	1%-5%	5.23	0.09	5.71	0.11	157	157
54	Acid	Straw biochar	1%-5%	5.71	0.571	6.62	0.662	157	157
76	Acid	Straw biochar	1%-5%	4.63	0.463	5.32	0.532	157	157
76	Acid	Straw biochar	1%-5%	5.04	0.504	5.9	0.59	157	157
76	Acid	Straw biochar	1%-5%	5.32	0.532	6	0.6	157	157
76	Acid	Straw biochar	1%-5%	4.84	0.484	5.45	0.545	157	157
76	Acid	Straw biochar	1%-5%	5.13	0.513	5.91	0.591	157	157
76	Acid	Straw biochar	1%-5%	6.08	0.608	6.08	0.608	157	157
87	Acid	Straw biochar	1%-5%	4.61	0.11	4.89	0.01	157	157
87	Acid	Straw biochar	1%-5%	4.61	0.11	4.96	0.01	157	157
87	Acid	Straw biochar	1%-5%	4.61	0.11	4.94	0.02	157	157
87	Acid	Straw biochar	1%-5%	4.61	0.11	4.98	0.03	157	157
87	Acid	Straw biochar	1%-5%	4.61	0.11	4.89	0.04	157	157
87	Acid	Straw biochar	1%-5%	4.61	0.11	5.02	0.02	157	157
87	Acid	Straw biochar	1%-5%	4.61	0.11	4.96	0.02	157	157
87	Acid	Straw biochar	1%-5%	4.61	0.11	5.2	0	157	157
87	Acid	Straw biochar	1%-5%	4.61	0.11	4.72	0.05	157	157
87	Acid	Straw biochar	1%-5%	5.07	0.15	5.12	0.1	157	157
87	Acid	Straw biochar	1%-5%	5.07	0.15	5.25	0.13	157	157
87	Acid	Straw biochar	1%-5%	5.07	0.15	5.37	0.13	157	157
87	Acid	Straw biochar	1%-5%	5.07	0.15	5.25	0.01	157	157
87	Acid	Straw biochar	1%-5%	5.07	0.15	5.44	0.07	157	157
87	Acid	Straw biochar	1%-5%	5.07	0.15	5.07	0.1	157	157
87	Acid	Straw biochar	1%-5%	5.07	0.15	5.15	0.08	157	157
87	Acid	Straw biochar	1%-5%	5.07	0.15	5.35	0.21	157	157
87	Acid	Straw biochar	1%-5%	5.07	0.15	5.27	0.18	157	157
87	Acid	Straw biochar	1%-5%	5.07	0.15	5.11	0.03	157	157
96	Acid	Straw biochar	1%-5%	4.3	0.02	5.11	0.04	157	157
112	Acid	Straw biochar	1%-5%	4.4	0.1732	4.84	0.19052	157	157
112	Acid	Straw biochar	1%-5%	4.4	0.19052	5.14	0.20784	157	157
112	Acid	Straw biochar	1%-5%	4.2	0.1732	4.87	0.20784	157	157
112	Acid	Straw biochar	1%-5%	4.14	0.15588	4.64	0.19052	157	157
115	Acid	Straw biochar	1%-5%	5.67	0.22516	6.32	0.15588	157	157
115	Acid	Straw biochar	1%-5%	6.02	0.06928	6.24	0.13856	157	157
115	Acid	Straw biochar	1%-5%	6.32	0.12124	6.5	0	157	157
115	Acid	Straw biochar	1%-5%	5.75	0.0866	6.06	0.0866	157	157
115	Acid	Straw biochar	1%-5%	5.89	0.13856	6.11	0.13856	157	157
115	Acid	Straw biochar	1%-5%	5.67	0.22516	6.24	0.22516	157	157
115	Acid	Straw biochar	1%-5%	6.02	0.06928	6.5	0.06928	157	157
115	Acid	Straw biochar	1%-5%	6.32	0.12124	6.5	0.06928	157	157
115	Acid	Straw biochar	1%-5%	5.75	0.0866	6.06	0.0866	157	157
115	Acid	Straw biochar	1%-5%	5.89	0.13856	6.32	0.31176	157	157
125	Acid	Straw biochar	1%-5%	5.2	0	5.5	0	157	157
125	Acid	Straw biochar	1%-5%	5.2	0	5.9	0	157	157
140	Acid	Straw biochar	1%-5%	5.7	0.01	6	0.05	157	157
140	Acid	Straw biochar	1%-5%	5.7	0.01	6.15	0.05	157	157
208	Acid	Straw biochar	1%-5%	4.31	0.01732	4.39	0.03464	157	157
208	Acid	Straw biochar	1%-5%	4.31	0.01732	4.54	0.01732	157	157
208	Acid	Straw biochar	1%-5%	4.31	0.01732	4.67	0.10392	157	157
208	Acid	Straw biochar	1%-5%	4.29	0.03464	4.73	0.10392	157	157
208	Acid	Straw biochar	1%-5%	4.29	0.03464	4.4	0.1732	157	157
208	Acid	Straw biochar	1%-5%	4.29	0.03464	4.51	0.05196	157	157
209	Acid	Straw biochar	1%-5%	3.47	0.347	4.75	0.475	157	157
209	Acid	Straw biochar	1%-5%	3.47	0.347	4	0.4	157	157
209	Acid	Straw biochar	1%-5%	3.47	0.347	4.41	0.441	157	157
209	Acid	Straw biochar	1%-5%	3.47	0.347	3.71	0.371	157	157
209	Acid	Straw biochar	1%-5%	3.69	0.369	4.71	0.471	157	157
211	Acid	Straw biochar	1%-5%	4.74	0.11	4.82	0.19	157	157
211	Acid	Straw biochar	1%-5%	4.74	0.11	4.97	0.05	157	157
226	Acid	Straw biochar	1%-5%	5.63	0.563	5.93	0.593	157	157
226	Acid	Straw biochar	1%-5%	5.38	0.538	5.79	0.579	157	157
229	Acid	Straw biochar	1%-5%	5.95	0.1	6.88	0.1	157	157
233	Acid	Straw biochar	1%-5%	5.83	0.583	6.36	0.636	157	157
233	Acid	Straw biochar	1%-5%	5.83	0.583	6.65	0.665	157	157
235	Acid	Straw biochar	1%-5%	4.5	0.16	4.92	0.16	157	157
263	Acid	Straw biochar	1%-5%	4.8	0.13856	5.21	0.29444	157	157
263	Acid	Straw biochar	1%-5%	4.8	0.13856	5.23	0.10392	157	157
263	Acid	Straw biochar	1%-5%	4.81	0.06928	4.87	0.15588	157	157
263	Acid	Straw biochar	1%-5%	4.81	0.06928	5.13	0.24248	157	157
265	Acid	Straw biochar	1%-5%	4.79	0.09	5.21	0.05	157	157
265	Acid	Straw biochar	1%-5%	4.79	0.09	5.32	0.04	157	157
265	Acid	Straw biochar	1%-5%	4.65	0.08	5.04	0.06	157	157
265	Acid	Straw biochar	1%-5%	4.65	0.08	5.04	0.08	157	157
265	Acid	Straw biochar	1%-5%	4.63	0.05	4.81	0.07	157	157
265	Acid	Straw biochar	1%-5%	4.63	0.05	5.02	0.04	157	157
265	Acid	Straw biochar	1%-5%	4.57	0.07	4.8	0.07	157	157
265	Acid	Straw biochar	1%-5%	4.57	0.07	4.75	0.05	157	157
265	Acid	Straw biochar	1%-5%	4.34	0.04	4.65	0.04	157	157
265	Acid	Straw biochar	1%-5%	4.34	0.04	4.66	0.05	157	157
276	Acid	Straw biochar	1%-5%	5.75	0.02	5.89	0.02	157	157
293	Acid	Straw biochar	1%-5%	5.9	0.3464	6.5	0.0866	157	157
326	Acid	Straw biochar	1%-5%	5.93	0.6062	6.46	0.03464	157	157
332	Acid	Straw biochar	1%-5%	4.88	0.05	5.12	0.01	157	157
332	Acid	Straw biochar	1%-5%	6.01	0.06	6.29	0.15	157	157
332	Acid	Straw biochar	1%-5%	5.54	0.23	6.26	0.17	157	157
333	Acid	Straw biochar	1%-5%	6.09	0.06	6.65	0.05	157	157
353	Acid	Straw biochar	1%-5%	5.11	0.06928	5.31	0	157	157
353	Acid	Straw biochar	1%-5%	5.06	0.506	5.1	0.51	157	157
366	Acid	Straw biochar	1%-5%	5.9	0.28	7.58	0.39	157	157
413	Acid	Straw biochar	1%-5%	6.19	0.01	6.3	0.06	157	157
413	Acid	Straw biochar	1%-5%	6.19	0.01	6.47	0.03	157	157
413	Acid	Straw biochar	1%-5%	6.19	0.02	6.69	0.09	157	157
413	Acid	Straw biochar	1%-5%	6.19	0.02	6.98	0.01	157	157
413	Acid	Straw biochar	1%-5%	6.31	0.06	6.32	0.06	157	157
413	Acid	Straw biochar	1%-5%	6.31	0.06	6.38	0.02	157	157
413	Acid	Straw biochar	1%-5%	6.19	0.11	6.48	0.06	157	157
413	Acid	Straw biochar	1%-5%	6.19	0.11	6.8	0.04	157	157
413	Acid	Straw biochar	1%-5%	6.22	0.07	6.41	0.04	157	157
413	Acid	Straw biochar	1%-5%	6.22	0.07	6.51	0.05	157	157
413	Acid	Straw biochar	1%-5%	6.32	0.04	6.75	0.06	157	157
413	Acid	Straw biochar	1%-5%	6.32	0.04	7.02	0.04	157	157
413	Acid	Straw biochar	1%-5%	6.32	0.06	6.41	0.08	157	157
413	Acid	Straw biochar	1%-5%	6.32	0.06	6.45	0.07	157	157
413	Acid	Straw biochar	1%-5%	6.39	0.07	6.52	0.04	157	157
413	Acid	Straw biochar	1%-5%	6.39	0.07	6.82	0.08	157	157
413	Acid	Straw biochar	1%-5%	6.24	0.08	6.38	0.08	157	157
413	Acid	Straw biochar	1%-5%	6.24	0.08	6.51	0.08	157	157
413	Acid	Straw biochar	1%-5%	6.35	0.05	6.75	0.04	157	157
413	Acid	Straw biochar	1%-5%	6.35	0.05	7.01	0.01	157	157
413	Acid	Straw biochar	1%-5%	6.31	0.08	6.33	0.05	157	157
413	Acid	Straw biochar	1%-5%	6.31	0.08	6.38	0.01	157	157
413	Acid	Straw biochar	1%-5%	6.27	0.05	6.44	0.06	157	157
413	Acid	Straw biochar	1%-5%	6.27	0.05	6.81	0.07	157	157
438	Acid	Straw biochar	1%-5%	4.94	0.19052	5.36	0.03464	157	157
438	Acid	Straw biochar	1%-5%	4.94	0.19052	5.52	0.15588	157	157
438	Acid	Straw biochar	1%-5%	4.96	0.10392	5.26	0.10392	157	157
438	Acid	Straw biochar	1%-5%	4.96	0.10392	5.29	0.10392	157	157
448	Acid	Straw biochar	1%-5%	5.41	0.05196	5.7	0.10392	157	157
448	Acid	Straw biochar	1%-5%	5.41	0.05196	6.32	0.03464	157	157
468	Acid	Straw biochar	1%-5%	5.49	0.02	5.84	0.18	157	157
468	Acid	Straw biochar	1%-5%	5.67	0.06	5.9	0.18	157	157
468	Acid	Straw biochar	1%-5%	6.3	0.1	6.55	0.12	157	157
473	Acid	Straw biochar	1%-5%	7.05	0.05	7.15	0.03	157	157
473	Acid	Straw biochar	1%-5%	7.06	0.02	7.13	0.03	157	157
473	Acid	Straw biochar	1%-5%	5.77	0.01	5.86	0.01	157	157
473	Acid	Straw biochar	1%-5%	5.68	0.02	5.85	0.01	157	157
482	Acid	Straw biochar	1%-5%	6.03	0.06928	7.02	0.13856	157	157
482	Acid	Straw biochar	1%-5%	6.01	0.0866	6.73	0.22516	157	157
523	Acid	Straw biochar	1%-5%	6.88	0.14	7.58	0.02	157	157
559	Acid	Straw biochar	1%-5%	4.55	0	4.67	0.01732	157	157
559	Acid	Straw biochar	1%-5%	4.55	0	4.92	0.29444	157	157
559	Acid	Straw biochar	1%-5%	4.55	0	4.75	0.03464	157	157
559	Acid	Straw biochar	1%-5%	4.55	0	4.7	0.06928	157	157
565	Acid	Straw biochar	1%-5%	5.68	0.03464	5.79	0.06928	157	157
565	Acid	Straw biochar	1%-5%	5.71	0.03464	5.83	0.01732	157	157
22	Acid	Straw biochar	5%-10%	4.95	0.495	7.69	0.265	32	32
96	Acid	Straw biochar	5%-10%	4.3	0.02	5.3	0.11	32	32
105	Acid	Straw biochar	5%-10%	4.48	0.04	6.03	0.04	32	32
105	Acid	Straw biochar	5%-10%	4.56	0.04	6.17	0.02	32	32
134	Acid	Straw biochar	5%-10%	3.95	0.01732	4.3	0.01732	32	32
134	Acid	Straw biochar	5%-10%	3.95	0.01732	4.6	0	32	32
134	Acid	Straw biochar	5%-10%	3.95	0.01732	5.17	0.03464	32	32
134	Acid	Straw biochar	5%-10%	3.95	0.01732	4.35	0	32	32
134	Acid	Straw biochar	5%-10%	3.95	0.01732	4.48	0.01732	32	32
134	Acid	Straw biochar	5%-10%	3.95	0.01732	4.8	0.01732	32	32
134	Acid	Straw biochar	5%-10%	3.95	0.01732	4.36	0	32	32
134	Acid	Straw biochar	5%-10%	3.95	0.01732	4.82	0.05196	32	32
134	Acid	Straw biochar	5%-10%	3.95	0.01732	5.2	0.01732	32	32
134	Acid	Straw biochar	5%-10%	3.95	0.01732	4.4	0	32	32
134	Acid	Straw biochar	5%-10%	3.95	0.01732	4.86	0.01732	32	32
134	Acid	Straw biochar	5%-10%	3.95	0.01732	5.22	0.01732	32	32
324	Acid	Straw biochar	5%-10%	5.36	0.05	5.59	0.02	32	32
396	Acid	Straw biochar	5%-10%	5.21	0.14	6.82	0.18	32	32
396	Acid	Straw biochar	5%-10%	5.21	0.14	6.78	0.16	32	32
396	Acid	Straw biochar	5%-10%	5.21	0.14	6.41	0.15	32	32
413	Acid	Straw biochar	5%-10%	6.19	0.01	6.8	0.05	32	32
413	Acid	Straw biochar	5%-10%	6.19	0.02	7.8	0.04	32	32
413	Acid	Straw biochar	5%-10%	6.31	0.06	6.55	0.06	32	32
413	Acid	Straw biochar	5%-10%	6.19	0.11	7.51	0.08	32	32
413	Acid	Straw biochar	5%-10%	6.22	0.07	6.84	0.12	32	32
413	Acid	Straw biochar	5%-10%	6.32	0.04	7.83	0.02	32	32
413	Acid	Straw biochar	5%-10%	6.32	0.06	6.59	0.01	32	32
413	Acid	Straw biochar	5%-10%	6.39	0.07	7.54	0.09	32	32
413	Acid	Straw biochar	5%-10%	6.24	0.08	6.87	0.15	32	32
413	Acid	Straw biochar	5%-10%	6.35	0.05	7.89	0.04	32	32
413	Acid	Straw biochar	5%-10%	6.31	0.08	6.58	0.03	32	32
413	Acid	Straw biochar	5%-10%	6.27	0.05	7.59	0.09	32	32
324	Acid	Straw biochar	10%-20%	5.36	0.05	5.63	0.05	3	3
324	Acid	Straw biochar	10%-20%	5.36	0.05	5.69	0.06	3	3
324	Acid	Straw biochar	10%-20%	5.36	0.05	5.74	0.03	3	3
68	Neutral	Straw biochar	＜1%	6.53	0.11	6.75	0.08	10	10
68	Neutral	Straw biochar	＜1%	6.53	0.11	6.77	0.18	10	10
68	Neutral	Straw biochar	＜1%	6.53	0.04	6.73	0.21	10	10
68	Neutral	Straw biochar	＜1%	6.53	0.04	6.77	0.05	10	10
445	Neutral	Straw biochar	＜1%	6.38	0.638	6.56	0.656	10	10
494	Neutral	Straw biochar	＜1%	6.84	0.06928	6.89	0.0866	10	10
494	Neutral	Straw biochar	＜1%	6.84	0.06928	6.98	0.05196	10	10
494	Neutral	Straw biochar	＜1%	6.96	0.06928	7	0.10392	10	10
494	Neutral	Straw biochar	＜1%	6.96	0.06928	7.05	0.03464	10	10
508	Neutral	Straw biochar	＜1%	6.38	0.638	6.56	0.656	10	10
68	Neutral	Straw biochar	1%-5%	6.53	0.11	6.77	0.12	14	14
68	Neutral	Straw biochar	1%-5%	6.53	0.04	6.89	0.11	14	14
111	Neutral	Straw biochar	1%-5%	6.67	0.03	6.74	0.03	14	14
111	Neutral	Straw biochar	1%-5%	6.64	0.01	6.71	0.05	14	14
111	Neutral	Straw biochar	1%-5%	6.62	0.03	6.69	0.02	14	14
111	Neutral	Straw biochar	1%-5%	6.71	0.04	6.76	0.02	14	14
111	Neutral	Straw biochar	1%-5%	6.72	0.01	6.75	0.04	14	14
111	Neutral	Straw biochar	1%-5%	6.72	0.02	6.75	0.01	14	14
301	Neutral	Straw biochar	1%-5%	6.69	0.13856	7.08	0.06928	14	14
445	Neutral	Straw biochar	1%-5%	6.38	0.638	7.12	0.712	14	14
476	Neutral	Straw biochar	1%-5%	6.52	0.13856	6.85	0.32908	14	14
494	Neutral	Straw biochar	1%-5%	6.84	0.06928	6.97	0.01732	14	14
494	Neutral	Straw biochar	1%-5%	6.96	0.06928	7.1	0.06928	14	14
508	Neutral	Straw biochar	1%-5%	6.38	0.638	7.12	0.712	14	14
301	Neutral	Straw biochar	5%-10%	6.69	0.13856	7.14	0.06928	5	5
370	Neutral	Straw biochar	5%-10%	7.31	0.35	7.61	0.32	5	5
370	Neutral	Straw biochar	5%-10%	7.24	0.1	7.46	0.03	5	5
445	Neutral	Straw biochar	5%-10%	6.38	0.638	7.72	0.772	5	5
508	Neutral	Straw biochar	5%-10%	6.38	0.638	7.72	0.772	5	5
301	Neutral	Straw biochar	10%-20%	6.69	0.13856	7.17	0.10392	7	7
370	Neutral	Straw biochar	10%-20%	7.31	0.35	7.81	0.15	7	7
370	Neutral	Straw biochar	10%-20%	7.31	0.35	8.06	0.1	7	7
370	Neutral	Straw biochar	10%-20%	7.31	0.35	8.18	0.15	7	7
370	Neutral	Straw biochar	10%-20%	7.24	0.1	7.51	0.23	7	7
370	Neutral	Straw biochar	10%-20%	7.24	0.1	7.49	0.05	7	7
370	Neutral	Straw biochar	10%-20%	7.24	0.1	8.03	0.1	7	7
32	Alkaline	Straw biochar	＜1%	7.87	0.11	7.91	0.07	49	49
32	Alkaline	Straw biochar	＜1%	8.01	0.08	8.15	0.18	49	49
40	Alkaline	Straw biochar	＜1%	8.47	0.04	8.33	0.08	49	49
40	Alkaline	Straw biochar	＜1%	8.47	0.04	8.29	0.06	49	49
40	Alkaline	Straw biochar	＜1%	8.47	0.04	8.27	0.05	49	49
40	Alkaline	Straw biochar	＜1%	8.47	0.04	8.15	0.04	49	49
40	Alkaline	Straw biochar	＜1%	8.47	0.04	8.35	0.04	49	49
40	Alkaline	Straw biochar	＜1%	8.47	0.04	8.29	0.04	49	49
40	Alkaline	Straw biochar	＜1%	8.47	0.04	8.28	0.04	49	49
40	Alkaline	Straw biochar	＜1%	8.47	0.04	8.07	0.07	49	49
40	Alkaline	Straw biochar	＜1%	8.35	0.1	8.11	0.06	49	49
40	Alkaline	Straw biochar	＜1%	8.35	0.1	8.03	0.06	49	49
40	Alkaline	Straw biochar	＜1%	8.35	0.1	7.87	0.1	49	49
40	Alkaline	Straw biochar	＜1%	8.35	0.1	7.71	0.06	49	49
40	Alkaline	Straw biochar	＜1%	8.29	0.06	8.17	0.06	49	49
40	Alkaline	Straw biochar	＜1%	8.29	0.06	8.13	0.1	49	49
40	Alkaline	Straw biochar	＜1%	8.29	0.06	8.13	0.02	49	49
40	Alkaline	Straw biochar	＜1%	8.29	0.06	7.93	0.06	49	49
48	Alkaline	Straw biochar	＜1%	8.43	0.03	8.39	0.03	49	49
48	Alkaline	Straw biochar	＜1%	8.43	0.03	8.43	0.01	49	49
48	Alkaline	Straw biochar	＜1%	8.2	0.02	8.23	0.05	49	49
48	Alkaline	Straw biochar	＜1%	8.2	0.02	8.16	0.03	49	49
66	Alkaline	Straw biochar	＜1%	8.01	0.01	8.07	0.04	49	49
66	Alkaline	Straw biochar	＜1%	8.01	0.01	8.09	0.05	49	49
146	Alkaline	Straw biochar	＜1%	8.08	0.808	7.88	0.788	49	49
241	Alkaline	Straw biochar	＜1%	8.63	0.06928	8.89	0.03464	49	49
319	Alkaline	Straw biochar	＜1%	8.18	0.12124	8.4	0.20784	49	49
342	Alkaline	Straw biochar	＜1%	8.73	0.03464	8.78	0.15588	49	49
342	Alkaline	Straw biochar	＜1%	8.75	0.36372	8.68	0.10392	49	49
342	Alkaline	Straw biochar	＜1%	8.36	0.2598	8.52	0.3464	49	49
402	Alkaline	Straw biochar	＜1%	8.16	0.01	8.16	0.06	49	49
402	Alkaline	Straw biochar	＜1%	8.16	0.01	8.19	0.06	49	49
402	Alkaline	Straw biochar	＜1%	8.16	0.01	8.15	0	49	49
402	Alkaline	Straw biochar	＜1%	8.39	0.02	8.43	0.08	49	49
402	Alkaline	Straw biochar	＜1%	8.39	0.02	8.44	0.03	49	49
402	Alkaline	Straw biochar	＜1%	8.39	0.02	8.37	0.02	49	49
419	Alkaline	Straw biochar	＜1%	8.2	0.82	8	0.8	49	49
419	Alkaline	Straw biochar	＜1%	8	0.8	7.8	0.78	49	49
462	Alkaline	Straw biochar	＜1%	8.21	0.02	8.32	0.02	49	49
462	Alkaline	Straw biochar	＜1%	8.21	0.02	8.35	0.04	49	49
462	Alkaline	Straw biochar	＜1%	8.22	0.03	8.18	8.2	49	49
462	Alkaline	Straw biochar	＜1%	8.22	0.03	8.23	0.04	49	49
462	Alkaline	Straw biochar	＜1%	8.04	0.03	8.1	0.07	49	49
462	Alkaline	Straw biochar	＜1%	8.04	0.03	8.08	0.07	49	49
501	Alkaline	Straw biochar	＜1%	8.19	0.12124	8.3	0.10392	49	49
501	Alkaline	Straw biochar	＜1%	8.1	0.06928	8.08	0.0866	49	49
501	Alkaline	Straw biochar	＜1%	8.02	0.24248	8.2	0.29444	49	49
501	Alkaline	Straw biochar	＜1%	8.27	0.06928	8.24	0.06928	49	49
501	Alkaline	Straw biochar	＜1%	8.37	0.06928	8.42	0.06928	49	49
32	Alkaline	Straw biochar	1%-5%	7.87	0.11	7.79	0.18	69	69
32	Alkaline	Straw biochar	1%-5%	8.01	0.08	7.99	0.08	69	69
40	Alkaline	Straw biochar	1%-5%	8.47	0.04	8.26	0.08	69	69
40	Alkaline	Straw biochar	1%-5%	8.47	0.04	8.28	0.06	69	69
40	Alkaline	Straw biochar	1%-5%	8.47	0.04	8.18	0.04	69	69
40	Alkaline	Straw biochar	1%-5%	8.47	0.04	8.24	0.02	69	69
40	Alkaline	Straw biochar	1%-5%	8.35	0.1	7.77	0.12	69	69
40	Alkaline	Straw biochar	1%-5%	8.35	0.1	7.81	0.09	69	69
40	Alkaline	Straw biochar	1%-5%	8.29	0.06	7.96	0.02	69	69
40	Alkaline	Straw biochar	1%-5%	8.29	0.06	8.12	0.06	69	69
61	Alkaline	Straw biochar	1%-5%	8.06	0.05	8.15	0.05	69	69
61	Alkaline	Straw biochar	1%-5%	8.06	0.05	8.17	0.07	69	69
91	Alkaline	Straw biochar	1%-5%	8.28	0.05196	7.93	0.41568	69	69
91	Alkaline	Straw biochar	1%-5%	8.28	0.05196	8.14	0.05196	69	69
146	Alkaline	Straw biochar	1%-5%	8.08	0.808	7.86	0.786	69	69
146	Alkaline	Straw biochar	1%-5%	8.08	0.808	7.85	0.785	69	69
146	Alkaline	Straw biochar	1%-5%	8.08	0.808	8.05	0.805	69	69
146	Alkaline	Straw biochar	1%-5%	8.08	0.808	7.99	0.799	69	69
162	Alkaline	Straw biochar	1%-5%	8.44	0.844	8.65	0.865	69	69
162	Alkaline	Straw biochar	1%-5%	8.44	0.844	8.68	0.868	69	69
162	Alkaline	Straw biochar	1%-5%	8.41	0.841	8.54	0.854	69	69
162	Alkaline	Straw biochar	1%-5%	8.41	0.841	8.56	0.856	69	69
162	Alkaline	Straw biochar	1%-5%	8.31	0.831	8.4	0.84	69	69
162	Alkaline	Straw biochar	1%-5%	8.31	0.831	8.43	0.843	69	69
162	Alkaline	Straw biochar	1%-5%	8.46	0.846	8.69	0.869	69	69
162	Alkaline	Straw biochar	1%-5%	8.46	0.846	8.71	0.871	69	69
162	Alkaline	Straw biochar	1%-5%	8.42	0.842	8.55	0.855	69	69
162	Alkaline	Straw biochar	1%-5%	8.42	0.842	8.56	0.856	69	69
162	Alkaline	Straw biochar	1%-5%	8.33	0.833	8.42	0.842	69	69
162	Alkaline	Straw biochar	1%-5%	8.33	0.833	8.44	0.844	69	69
240	Alkaline	Straw biochar	1%-5%	7.08	0.2598	7.23	0.3464	69	69
240	Alkaline	Straw biochar	1%-5%	7.08	0.2598	7.22	0.2598	69	69
240	Alkaline	Straw biochar	1%-5%	7.08	0.2598	7.41	0.48496	69	69
240	Alkaline	Straw biochar	1%-5%	7.66	0.2598	7.7	0.2598	69	69
240	Alkaline	Straw biochar	1%-5%	7.66	0.2598	7.81	0.39836	69	69
240	Alkaline	Straw biochar	1%-5%	7.66	0.2598	7.94	0.79672	69	69
303	Alkaline	Straw biochar	1%-5%	8.03	0.803	8.36	0.836	69	69
303	Alkaline	Straw biochar	1%-5%	8.3	0.83	8.24	0.824	69	69
303	Alkaline	Straw biochar	1%-5%	8.23	0.823	8.39	0.839	69	69
303	Alkaline	Straw biochar	1%-5%	8.3	0.83	8.24	0.824	69	69
400	Alkaline	Straw biochar	1%-5%	8.46	0.01	8.47	0.04	69	69
400	Alkaline	Straw biochar	1%-5%	8.42	0.01	8.41	0.03	69	69
400	Alkaline	Straw biochar	1%-5%	8.39	0.02	8.37	0.02	69	69
400	Alkaline	Straw biochar	1%-5%	8.37	0	8.38	0.04	69	69
441	Alkaline	Straw biochar	1%-5%	8.4	0.01732	8.32	0.01732	69	69
441	Alkaline	Straw biochar	1%-5%	8.38	0.01732	8.32	0.01732	69	69
442	Alkaline	Straw biochar	1%-5%	8.25	0.06	8.23	0.04	69	69
462	Alkaline	Straw biochar	1%-5%	8.21	0.02	8.35	0.02	69	69
462	Alkaline	Straw biochar	1%-5%	8.21	0.02	8.37	0.04	69	69
462	Alkaline	Straw biochar	1%-5%	8.22	0.03	8.21	8.25	69	69
462	Alkaline	Straw biochar	1%-5%	8.22	0.03	8.19	8.21	69	69
462	Alkaline	Straw biochar	1%-5%	8.04	0.03	8.05	0.01	69	69
462	Alkaline	Straw biochar	1%-5%	8.04	0.03	8.05	0.07	69	69
463	Alkaline	Straw biochar	1%-5%	7.66	0.20784	7.7	0.13856	69	69
463	Alkaline	Straw biochar	1%-5%	7.66	0.20784	7.81	0.20784	69	69
463	Alkaline	Straw biochar	1%-5%	7.66	0.20784	7.93	0.793	69	69
476	Alkaline	Straw biochar	1%-5%	8.89	0.2598	9.05	0.45032	69	69
501	Alkaline	Straw biochar	1%-5%	8.19	0.12124	8.26	0.01732	69	69
501	Alkaline	Straw biochar	1%-5%	8.19	0.12124	8.33	0.06928	69	69
501	Alkaline	Straw biochar	1%-5%	8.1	0.06928	8.1	0.10392	69	69
501	Alkaline	Straw biochar	1%-5%	8.1	0.06928	8.15	0.03464	69	69
501	Alkaline	Straw biochar	1%-5%	8.02	0.24248	8.21	0.2598	69	69
501	Alkaline	Straw biochar	1%-5%	8.02	0.24248	8.27	0.12124	69	69
501	Alkaline	Straw biochar	1%-5%	8.27	0.06928	8.31	0.29444	69	69
501	Alkaline	Straw biochar	1%-5%	8.27	0.06928	8.35	0.20784	69	69
501	Alkaline	Straw biochar	1%-5%	8.37	0.06928	8.49	0.0866	69	69
501	Alkaline	Straw biochar	1%-5%	8.37	0.06928	8.49	0.12124	69	69
565	Alkaline	Straw biochar	1%-5%	7.88	0.01732	8.3	0	69	69
565	Alkaline	Straw biochar	1%-5%	8.08	0.01732	8.42	0.01732	69	69
61	Alkaline	Straw biochar	5%-10%	8.06	0.05	8.18	0.03	9	9
91	Alkaline	Straw biochar	5%-10%	8.28	0.05196	8.15	0.03464	9	9
162	Alkaline	Straw biochar	5%-10%	8.44	0.844	8.7	0.87	9	9
162	Alkaline	Straw biochar	5%-10%	8.41	0.841	8.56	0.856	9	9
162	Alkaline	Straw biochar	5%-10%	8.31	0.831	8.45	0.845	9	9
162	Alkaline	Straw biochar	5%-10%	8.46	0.846	8.73	0.873	9	9
162	Alkaline	Straw biochar	5%-10%	8.42	0.842	8.58	0.858	9	9
162	Alkaline	Straw biochar	5%-10%	8.33	0.833	8.46	0.846	9	9
442	Alkaline	Straw biochar	5%-10%	8.25	0.06	8.18	0.04	9	9
442	Alkaline	Straw biochar	10%-20%	8.25	0.06	8.01	0.06	1	1
128	Acid	Wood biochar	＜1%	5.71	0.05196	5.96	0.03464	3	3
231	Acid	Wood biochar	＜1%	6.01	0.033	6.16	0.066	3	3
231	Acid	Wood biochar	＜1%	5.06	0.038	5.13	0.068	3	3
13	Acid	Wood biochar	1%-5%	6.4	0.13416	7.2	0.1118	28	28
13	Acid	Wood biochar	1%-5%	6.4	0.13416	7.58	0.1118	28	28
13	Acid	Wood biochar	1%-5%	6.4	0.13416	7.8	0.06708	28	28
13	Acid	Wood biochar	1%-5%	6.4	0.13416	7.11	0.08944	28	28
13	Acid	Wood biochar	1%-5%	6.4	0.13416	7.48	0.15652	28	28
13	Acid	Wood biochar	1%-5%	6.4	0.13416	7.69	0.04472	28	28
13	Acid	Wood biochar	1%-5%	6.4	0.13416	7.24	0.04472	28	28
13	Acid	Wood biochar	1%-5%	6.4	0.13416	7.53	0.1118	28	28
13	Acid	Wood biochar	1%-5%	6.4	0.13416	7.8	0.04472	28	28
96	Acid	Wood biochar	1%-5%	4.3	0.02	4.74	0.06	28	28
128	Acid	Wood biochar	1%-5%	5.71	0.05196	6.17	0.0866	28	28
128	Acid	Wood biochar	1%-5%	5.71	0.05196	6.33	0.03464	28	28
219	Acid	Wood biochar	1%-5%	6.42	0.05	6.68	0.12	28	28
322	Acid	Wood biochar	1%-5%	5.56	0.0866	6.33	0.10392	28	28
322	Acid	Wood biochar	1%-5%	3.83	0.19052	4.17	0.0866	28	28
509	Acid	Wood biochar	1%-5%	5.99	0.10392	6.07	0.05196	28	28
509	Acid	Wood biochar	1%-5%	5.99	0.10392	6.22	0.06928	28	28
509	Acid	Wood biochar	1%-5%	5.69	0.13856	5.94	0.06928	28	28
509	Acid	Wood biochar	1%-5%	5.69	0.13856	6.3	0.06928	28	28
565	Acid	Wood biochar	1%-5%	5.68	0.03464	5.79	0.06928	28	28
565	Acid	Wood biochar	1%-5%	5.71	0.03464	5.79	0.03464	28	28
577	Acid	Wood biochar	1%-5%	6.07	0	6.43	0	28	28
577	Acid	Wood biochar	1%-5%	6.27	0.05196	6.39	0.06928	28	28
577	Acid	Wood biochar	1%-5%	6.78	0.05196	6.33	0.05196	28	28
577	Acid	Wood biochar	1%-5%	5.69	0.15588	5.98	0.10392	28	28
577	Acid	Wood biochar	1%-5%	6.53	0.05196	6.82	0.10392	28	28
577	Acid	Wood biochar	1%-5%	6.59	0.05196	6.69	0.05196	28	28
577	Acid	Wood biochar	1%-5%	6.3	0.06928	6.75	0.05196	28	28
96	Acid	Wood biochar	5%-10%	4.3	0.02	5.2	0.01	13	13
322	Acid	Wood biochar	5%-10%	5.56	0.0866	6.67	0.0866	13	13
322	Acid	Wood biochar	5%-10%	3.83	0.19052	4.56	0.0866	13	13
509	Acid	Wood biochar	5%-10%	5.99	0.10392	6.66	0.10392	13	13
509	Acid	Wood biochar	5%-10%	5.69	0.13856	6.7	0.05196	13	13
577	Acid	Wood biochar	5%-10%	6.07	0	6.49	0.15588	13	13
577	Acid	Wood biochar	5%-10%	6.27	0.05196	6.78	0	13	13
577	Acid	Wood biochar	5%-10%	6.78	0.05196	7.04	0.06928	13	13
577	Acid	Wood biochar	5%-10%	5.98	0.15588	6.01	0.3464	13	13
577	Acid	Wood biochar	5%-10%	5.69	0.15588	5.98	0.05196	13	13
577	Acid	Wood biochar	5%-10%	6.53	0.05196	7.26	0.06928	13	13
577	Acid	Wood biochar	5%-10%	6.59	0.05196	6.66	0.05196	13	13
577	Acid	Wood biochar	5%-10%	6.3	0.06928	6.5	0.05196	13	13
36	Alkaline	Wood biochar	＜1%	7.72	0.03464	7.73	0.03464	6	6
128	Alkaline	Wood biochar	＜1%	8	0.03464	8.07	0.03464	6	6
394	Alkaline	Wood biochar	＜1%	7.99	0.05196	7.62	0.10392	6	6
394	Alkaline	Wood biochar	＜1%	8.02	0.06928	7.95	0.06928	6	6
456	Alkaline	Wood biochar	＜1%	8.85	0.885	8.76	0.876	6	6
456	Alkaline	Wood biochar	＜1%	8.85	0.885	8.81	0.881	6	6
36	Alkaline	Wood biochar	1%-5%	7.72	0.03464	7.76	0.05196	9	9
36	Alkaline	Wood biochar	1%-5%	7.72	0.03464	7.79	0.05196	9	9
36	Alkaline	Wood biochar	1%-5%	7.72	0.03464	7.83	0.05196	9	9
128	Alkaline	Wood biochar	1%-5%	8	0.03464	8.11	0.06928	9	9
128	Alkaline	Wood biochar	1%-5%	8	0.03464	8.13	0.03464	9	9
175	Alkaline	Wood biochar	1%-5%	8.25	0.06	8.18	0.03	9	9
456	Alkaline	Wood biochar	1%-5%	8.85	0.885	8.91	0.891	9	9
565	Alkaline	Wood biochar	1%-5%	7.88	0.01732	8.19	0	9	9
565	Alkaline	Wood biochar	1%-5%	8.08	0.01732	8.23	0.01732	9	9
175	Alkaline	Wood biochar	5%-10%	8.25	0.06	8.11	0.04	2	2
175	Alkaline	Wood biochar	5%-10%	8.25	0.06	7.99	0.01	2	2
53	Acid	Other biochar	＜1%	6.51	0.0866	6.53	0.12124	1	1
53	Acid	Other biochar	1%-5%	6.51	0.0866	6.53	0.13856	7	7
53	Acid	Other biochar	1%-5%	6.51	0.0866	6.59	0.0866	7	7
53	Acid	Other biochar	1%-5%	6.51	0.0866	6.62	0.12124	7	7
136	Acid	Other biochar	1%-5%	4.08	0.408	4.35	0.435	7	7
136	Acid	Other biochar	1%-5%	4.08	0.408	4.55	0.435	7	7
211	Acid	Other biochar	1%-5%	4.74	0.11	5.88	0.15	7	7
211	Acid	Other biochar	1%-5%	4.74	0.11	6.56	0.25	7	7
232	Neutral	Other biochar	＜1%	7.17	0.717	7.35	0.735	3	3
232	Neutral	Other biochar	＜1%	7.17	0.717	7.34	0.734	3	3
232	Neutral	Other biochar	＜1%	7.17	0.717	7.63	0.763	3	3
232	Neutral	Other biochar	1%-5%	7.17	0.717	7.4	0.74	6	6
232	Neutral	Other biochar	1%-5%	7.17	0.717	7.43	0.743	6	6
232	Neutral	Other biochar	1%-5%	7.17	0.717	7.55	0.755	6	6
232	Neutral	Other biochar	1%-5%	7.17	0.717	7.65	0.765	6	6
232	Neutral	Other biochar	1%-5%	7.17	0.717	7.7	0.77	6	6
232	Neutral	Other biochar	1%-5%	7.17	0.717	7.79	0.779	6	6
489	Alkaline	Other biochar	＜1%	7.87	0.01732	8.13	0.06928	3	3
489	Alkaline	Other biochar	＜1%	7.94	0.12124	8.2	0.10392	3	3
489	Alkaline	Other biochar	＜1%	7.95	0.13856	8.24	0.06928	3	3
302	Alkaline	Other biochar	1%-5%	8.08	0.02	8.26	0.03	8	8
302	Alkaline	Other biochar	1%-5%	7.22	0.03	7.62	0.03	8	8
489	Alkaline	Other biochar	1%-5%	7.87	0.01732	8.21	0.05196	8	8
489	Alkaline	Other biochar	1%-5%	7.87	0.01732	8.39	0.05196	8	8
489	Alkaline	Other biochar	1%-5%	7.94	0.12124	8.23	0.03464	8	8
489	Alkaline	Other biochar	1%-5%	7.94	0.12124	8.33	0.05196	8	8
489	Alkaline	Other biochar	1%-5%	7.95	0.13856	8.27	0.10392	8	8
489	Alkaline	Other biochar	1%-5%	7.95	0.13856	8.38	0.03464	8	8
489	Alkaline	Other biochar	5%-10%	7.87	0.01732	8.51	0.06928	3	3
489	Alkaline	Other biochar	5%-10%	7.94	0.12124	8.5	0.06928	3	3
489	Alkaline	Other biochar	5%-10%	7.95	0.13856	8.47	0.01732	3	3

## Sheet: Temperature and application
Num.	Soil pH	Biochar temperature	Biochar application	Control pH	Control SD	Experiment pH	Experiment SD	Sample size of control group	Sample size of experiment group
50	Acid	200-400	＜1%	5.27	0.0866	5.71	0.38104	6	6
50	Acid	200-400	＜1%	5.27	0.0866	6.01	0.32908	6	6
50	Acid	200-400	＜1%	5.27	0.0866	6.12	0.12124	6	6
50	Acid	200-400	＜1%	6.34	0.41568	6.79	0.12124	6	6
50	Acid	200-400	＜1%	6.34	0.41568	6.97	0.57156	6	6
50	Acid	200-400	＜1%	6.34	0.41568	6.99	0.41568	6	6
50	Acid	200-400	1%-5%	5.27	0.0866	6.25	0.01732	14	14
50	Acid	200-400	1%-5%	6.34	0.41568	7.23	0.2598	14	14
87	Acid	200-400	1%-5%	4.61	0.11	4.89	0.01	14	14
87	Acid	200-400	1%-5%	4.61	0.11	4.96	0.01	14	14
87	Acid	200-400	1%-5%	4.61	0.11	5.02	0.02	14	14
87	Acid	200-400	1%-5%	4.61	0.11	4.96	0.02	14	14
87	Acid	200-400	1%-5%	5.07	0.15	5.12	0.1	14	14
87	Acid	200-400	1%-5%	5.07	0.15	5.25	0.13	14	14
87	Acid	200-400	1%-5%	5.07	0.15	5.07	0.1	14	14
87	Acid	200-400	1%-5%	5.07	0.15	5.15	0.08	14	14
136	Acid	200-400	1%-5%	4.08	0.408	4.35	0.435	14	14
136	Acid	200-400	1%-5%	4.08	0.408	4.55	0.435	14	14
559	Acid	200-400	1%-5%	4.55	0	4.67	0.01732	14	14
559	Acid	200-400	1%-5%	4.55	0	4.75	0.03464	14	14
134	Acid	200-400	5%-10%	3.95	0.01732	4.3	0.01732	4	4
134	Acid	200-400	5%-10%	3.95	0.01732	4.35	0	4	4
134	Acid	200-400	5%-10%	3.95	0.01732	4.36	0	4	4
134	Acid	200-400	5%-10%	3.95	0.01732	4.4	0	4	4
66	Alkaline	200-400	＜1%	8.01	0.01	8.07	0.04	6	6
66	Alkaline	200-400	＜1%	8.01	0.01	8.09	0.05	6	6
146	Alkaline	200-400	＜1%	8.08	0.808	7.88	0.788	6	6
489	Alkaline	200-400	＜1%	7.87	0.01732	8.13	0.06928	6	6
489	Alkaline	200-400	＜1%	7.94	0.12124	8.2	0.10392	6	6
489	Alkaline	200-400	＜1%	7.95	0.13856	8.24	0.06928	6	6
91	Alkaline	200-400	1%-5%	8.28	0.05196	7.93	0.41568	12	12
91	Alkaline	200-400	1%-5%	8.28	0.05196	8.14	0.05196	12	12
146	Alkaline	200-400	1%-5%	8.08	0.808	7.86	0.786	12	12
146	Alkaline	200-400	1%-5%	8.08	0.808	7.85	0.785	12	12
146	Alkaline	200-400	1%-5%	8.08	0.808	8.05	0.805	12	12
146	Alkaline	200-400	1%-5%	8.08	0.808	7.99	0.799	12	12
489	Alkaline	200-400	1%-5%	7.87	0.01732	8.21	0.05196	12	12
489	Alkaline	200-400	1%-5%	7.87	0.01732	8.39	0.05196	12	12
489	Alkaline	200-400	1%-5%	7.94	0.12124	8.23	0.03464	12	12
489	Alkaline	200-400	1%-5%	7.94	0.12124	8.33	0.05196	12	12
489	Alkaline	200-400	1%-5%	7.95	0.13856	8.27	0.10392	12	12
489	Alkaline	200-400	1%-5%	7.95	0.13856	8.38	0.03464	12	12
91	Alkaline	200-400	5%-10%	8.28	0.05196	8.15	0.03464	4	4
489	Alkaline	200-400	5%-10%	7.87	0.01732	8.51	0.06928	4	4
489	Alkaline	200-400	5%-10%	7.94	0.12124	8.5	0.06928	4	4
489	Alkaline	200-400	5%-10%	7.95	0.13856	8.47	0.01732	4	4
16	Acid	400-600	＜1%	4.46	0.09	5.1	0.35	119	119
16	Acid	400-600	＜1%	4.46	0.09	5	0.01	119	119
16	Acid	400-600	＜1%	4.41	0.04	4.53	0.39	119	119
16	Acid	400-600	＜1%	4.41	0.04	4.73	0.19	119	119
16	Acid	400-600	＜1%	4.63	0.01	4.69	0.23	119	119
16	Acid	400-600	＜1%	4.63	0.01	4.67	0.17	119	119
16	Acid	400-600	＜1%	4.59	0.2	4.66	0.36	119	119
17	Acid	400-600	＜1%	6.56	0.056	6.71	0.06	119	119
22	Acid	400-600	＜1%	5.07	0.507	5.07	0.507	119	119
22	Acid	400-600	＜1%	5.07	0.507	5.29	0.529	119	119
22	Acid	400-600	＜1%	5.07	0.507	5.14	0.514	119	119
22	Acid	400-600	＜1%	4.95	0.495	5.13	0.272	119	119
37	Acid	400-600	＜1%	5.3	0.03	5.42	0.07	119	119
48	Acid	400-600	＜1%	4.76	0.07	4.8	0.04	119	119
48	Acid	400-600	＜1%	4.76	0.07	5.05	0.08	119	119
48	Acid	400-600	＜1%	4.81	0.02	4.83	0.06	119	119
48	Acid	400-600	＜1%	4.81	0.02	5.92	0.05	119	119
53	Acid	400-600	＜1%	6.51	0.0866	6.53	0.12124	119	119
56	Acid	400-600	＜1%	4.61	0.1732	4.65	0.22516	119	119
56	Acid	400-600	＜1%	4.61	0.1732	4.82	0.12124	119	119
56	Acid	400-600	＜1%	4.61	0.1732	4.86	0.1732	119	119
56	Acid	400-600	＜1%	4.61	0.1732	5.22	0.24248	119	119
60	Acid	400-600	＜1%	5.46	0.546	6.69	0.669	119	119
60	Acid	400-600	＜1%	5.17	0.517	6.64	0.664	119	119
60	Acid	400-600	＜1%	4.97	0.497	6.27	0.627	119	119
79	Acid	400-600	＜1%	5.4	0.3	6	0.2	119	119
79	Acid	400-600	＜1%	5.4	0.2	6.6	0.1	119	119
79	Acid	400-600	＜1%	5.3	0.2	6.2	0.4	119	119
79	Acid	400-600	＜1%	5.2	0	5.7	0.5	119	119
79	Acid	400-600	＜1%	5.2	0.2	6	0.4	119	119
79	Acid	400-600	＜1%	5.5	0.6	5.8	0.3	119	119
86	Acid	400-600	＜1%	3.9	0.02	4	0.05	119	119
128	Acid	400-600	＜1%	5.71	0.05196	5.96	0.03464	119	119
140	Acid	400-600	＜1%	5.7	0.01	5.78	0.02	119	119
209	Acid	400-600	＜1%	3.47	0.347	3.74	0.374	119	119
226	Acid	400-600	＜1%	5.63	0.563	5.84	0.584	119	119
226	Acid	400-600	＜1%	5.38	0.538	5.49	0.549	119	119
263	Acid	400-600	＜1%	4.8	0.13856	4.97	0.10392	119	119
263	Acid	400-600	＜1%	4.8	0.13856	4.97	0.24248	119	119
263	Acid	400-600	＜1%	4.8	0.13856	5.12	0.31176	119	119
263	Acid	400-600	＜1%	4.8	0.13856	5.04	0.19052	119	119
263	Acid	400-600	＜1%	4.81	0.06928	4.81	0.20784	119	119
263	Acid	400-600	＜1%	4.81	0.06928	4.87	0.19052	119	119
263	Acid	400-600	＜1%	4.81	0.06928	4.91	0.12124	119	119
265	Acid	400-600	＜1%	4.79	0.09	4.84	0.07	119	119
265	Acid	400-600	＜1%	4.79	0.09	4.88	0.07	119	119
265	Acid	400-600	＜1%	4.79	0.09	5.02	0.08	119	119
265	Acid	400-600	＜1%	4.79	0.09	5.19	0.07	119	119
265	Acid	400-600	＜1%	4.65	0.08	4.76	0.05	119	119
265	Acid	400-600	＜1%	4.65	0.08	4.88	0.08	119	119
265	Acid	400-600	＜1%	4.65	0.08	4.8	0.08	119	119
265	Acid	400-600	＜1%	4.65	0.08	4.91	0.06	119	119
265	Acid	400-600	＜1%	4.63	0.05	4.75	0.08	119	119
265	Acid	400-600	＜1%	4.63	0.05	4.73	0.07	119	119
265	Acid	400-600	＜1%	4.63	0.05	4.8	0.07	119	119
265	Acid	400-600	＜1%	4.63	0.05	4.88	0.05	119	119
265	Acid	400-600	＜1%	4.57	0.07	4.6	0.06	119	119
265	Acid	400-600	＜1%	4.57	0.07	4.76	0.07	119	119
265	Acid	400-600	＜1%	4.57	0.07	4.73	0.07	119	119
265	Acid	400-600	＜1%	4.57	0.07	4.79	0.04	119	119
265	Acid	400-600	＜1%	4.34	0.04	4.36	0.07	119	119
265	Acid	400-600	＜1%	4.34	0.04	4.36	0.05	119	119
265	Acid	400-600	＜1%	4.34	0.04	4.58	0.06	119	119
265	Acid	400-600	＜1%	4.34	0.04	4.52	0.04	119	119
283	Acid	400-600	＜1%	6.07	0.12	6.07	0.12	119	119
283	Acid	400-600	＜1%	6.07	0.12	6.19	0.08	119	119
283	Acid	400-600	＜1%	5.66	0.04	6.09	0.08	119	119
283	Acid	400-600	＜1%	5.66	0.04	6.21	0.12	119	119
326	Acid	400-600	＜1%	5.93	0.6062	6.11	0.15588	119	119
332	Acid	400-600	＜1%	4.88	0.05	4.99	0.13	119	119
332	Acid	400-600	＜1%	6.01	0.06	6.15	0.02	119	119
332	Acid	400-600	＜1%	5.54	0.23	5.89	0.05	119	119
333	Acid	400-600	＜1%	6.09	0.06	6.14	0.07	119	119
342	Acid	400-600	＜1%	5.51	0.05196	6.23	0.15588	119	119
342	Acid	400-600	＜1%	5.42	0.06928	6.5	0.05196	119	119
342	Acid	400-600	＜1%	5.32	0.29444	6.26	0.0866	119	119
392	Acid	400-600	＜1%	4.77	0.477	4.81	0.481	119	119
392	Acid	400-600	＜1%	4.77	0.477	5.05	0.505	119	119
392	Acid	400-600	＜1%	4.6	0.46	4.77	0.477	119	119
392	Acid	400-600	＜1%	4.6	0.46	6.18	0.618	119	119
392	Acid	400-600	＜1%	4.39	0.439	4.53	0.453	119	119
392	Acid	400-600	＜1%	4.39	0.439	6.45	0.645	119	119
392	Acid	400-600	＜1%	4.7	0.47	5.05	0.505	119	119
392	Acid	400-600	＜1%	4.7	0.47	7.28	0.728	119	119
392	Acid	400-600	＜1%	4.12	0.412	4.6	0.46	119	119
392	Acid	400-600	＜1%	4.12	0.412	7.18	0.718	119	119
392	Acid	400-600	＜1%	4.81	0.481	4.84	0.484	119	119
392	Acid	400-600	＜1%	4.81	0.481	5.94	0.594	119	119
392	Acid	400-600	＜1%	5.08	0.508	5.22	0.522	119	119
392	Acid	400-600	＜1%	5.08	0.508	6.76	0.676	119	119
392	Acid	400-600	＜1%	4.91	0.491	6.56	0.656	119	119
392	Acid	400-600	＜1%	4.81	0.481	5.12	0.512	119	119
392	Acid	400-600	＜1%	4.81	0.481	7.31	0.731	119	119
392	Acid	400-600	＜1%	3.78	0.378	4.53	0.453	119	119
392	Acid	400-600	＜1%	3.78	0.378	7.07	0.707	119	119
393	Acid	400-600	＜1%	4.09	0.1732	4.43	0.19052	119	119
425	Acid	400-600	＜1%	4.45	0.03464	4.56	0.10392	119	119
425	Acid	400-600	＜1%	4.45	0.03464	4.65	0.0866	119	119
425	Acid	400-600	＜1%	4.45	0.03464	4.78	0.10392	119	119
448	Acid	400-600	＜1%	5.41	0.05196	5.49	0.03464	119	119
468	Acid	400-600	＜1%	5.49	0.02	5.54	0.06	119	119
468	Acid	400-600	＜1%	5.67	0.06	5.75	0.04	119	119
473	Acid	400-600	＜1%	7.05	0.05	7.08	0.07	119	119
473	Acid	400-600	＜1%	7.06	0.02	7.06	0.01	119	119
473	Acid	400-600	＜1%	5.77	0.01	5.83	0.06	119	119
473	Acid	400-600	＜1%	5.68	0.02	5.76	0.04	119	119
474	Acid	400-600	＜1%	6.12	0.612	6.43	0.643	119	119
474	Acid	400-600	＜1%	6.12	0.612	6.38	0.638	119	119
474	Acid	400-600	＜1%	6.12	0.612	6.35	0.635	119	119
474	Acid	400-600	＜1%	6.11	0.611	6.62	0.662	119	119
474	Acid	400-600	＜1%	6.11	0.611	6.55	0.655	119	119
474	Acid	400-600	＜1%	6.11	0.611	6.6	0.66	119	119
474	Acid	400-600	＜1%	6.17	0.617	6.56	0.656	119	119
474	Acid	400-600	＜1%	6.17	0.617	6.6	0.66	119	119
474	Acid	400-600	＜1%	6.17	0.617	6.61	0.661	119	119
482	Acid	400-600	＜1%	6.03	0.06928	6.2	0.10392	119	119
482	Acid	400-600	＜1%	6.03	0.06928	6.35	0.10392	119	119
482	Acid	400-600	＜1%	6.01	0.0866	6.19	0.03464	119	119
482	Acid	400-600	＜1%	6.01	0.0866	6.34	0.05196	119	119
13	Acid	400-600	1%-5%	6.4	0.13416	7.2	0.1118	139	139
13	Acid	400-600	1%-5%	6.4	0.13416	7.58	0.1118	139	139
13	Acid	400-600	1%-5%	6.4	0.13416	7.8	0.06708	139	139
13	Acid	400-600	1%-5%	6.4	0.13416	7.11	0.08944	139	139
13	Acid	400-600	1%-5%	6.4	0.13416	7.48	0.15652	139	139
13	Acid	400-600	1%-5%	6.4	0.13416	7.69	0.04472	139	139
13	Acid	400-600	1%-5%	6.4	0.13416	7.24	0.04472	139	139
13	Acid	400-600	1%-5%	6.4	0.13416	7.53	0.1118	139	139
13	Acid	400-600	1%-5%	6.4	0.13416	7.8	0.04472	139	139
17	Acid	400-600	1%-5%	6.56	0.056	6.87	0.05	139	139
22	Acid	400-600	1%-5%	4.95	0.495	6.81	0.238	139	139
24	Acid	400-600	1%-5%	5.69	0.08	5.93	0.04	139	139
24	Acid	400-600	1%-5%	5.69	0.08	6.38	0.1	139	139
24	Acid	400-600	1%-5%	5.75	0.08	5.92	0.11	139	139
24	Acid	400-600	1%-5%	5.75	0.08	6.35	0.07	139	139
24	Acid	400-600	1%-5%	5.98	0.2	6.31	0.55	139	139
24	Acid	400-600	1%-5%	5.98	0.2	6.45	0.15	139	139
24	Acid	400-600	1%-5%	5.89	0.2	6.1	0.22	139	139
24	Acid	400-600	1%-5%	5.89	0.2	6.4	0.06	139	139
34	Acid	400-600	1%-5%	3.77	0.01	3.88	0.03	139	139
34	Acid	400-600	1%-5%	5.17	0.03	5.32	0.02	139	139
34	Acid	400-600	1%-5%	4.52	0.04	4.83	0.01	139	139
34	Acid	400-600	1%-5%	3.85	0.01	3.96	0.01	139	139
34	Acid	400-600	1%-5%	3.81	0.02	4.05	0.01	139	139
37	Acid	400-600	1%-5%	5.3	0.03	5.61	0.11	139	139
52	Acid	400-600	1%-5%	5.54	0.24	6.12	0.04	139	139
52	Acid	400-600	1%-5%	5.49	0.2	6.03	0.17	139	139
52	Acid	400-600	1%-5%	5.37	0.14	5.72	0.06	139	139
52	Acid	400-600	1%-5%	5.42	0.02	5.69	0.27	139	139
52	Acid	400-600	1%-5%	5.23	0.09	5.71	0.11	139	139
53	Acid	400-600	1%-5%	6.51	0.0866	6.53	0.13856	139	139
53	Acid	400-600	1%-5%	6.51	0.0866	6.59	0.0866	139	139
53	Acid	400-600	1%-5%	6.51	0.0866	6.62	0.12124	139	139
54	Acid	400-600	1%-5%	5.71	0.571	6.62	0.662	139	139
76	Acid	400-600	1%-5%	4.63	0.463	5.32	0.532	139	139
76	Acid	400-600	1%-5%	5.04	0.504	5.9	0.59	139	139
76	Acid	400-600	1%-5%	5.32	0.532	6	0.6	139	139
76	Acid	400-600	1%-5%	4.84	0.484	5.45	0.545	139	139
76	Acid	400-600	1%-5%	5.13	0.513	5.91	0.591	139	139
76	Acid	400-600	1%-5%	6.08	0.608	6.08	0.608	139	139
87	Acid	400-600	1%-5%	4.61	0.11	4.94	0.02	139	139
87	Acid	400-600	1%-5%	4.61	0.11	4.98	0.03	139	139
87	Acid	400-600	1%-5%	4.61	0.11	5.2	0	139	139
87	Acid	400-600	1%-5%	4.61	0.11	4.72	0.05	139	139
87	Acid	400-600	1%-5%	5.07	0.15	5.37	0.13	139	139
87	Acid	400-600	1%-5%	5.07	0.15	5.25	0.01	139	139
87	Acid	400-600	1%-5%	5.07	0.15	5.35	0.21	139	139
87	Acid	400-600	1%-5%	5.07	0.15	5.27	0.18	139	139
96	Acid	400-600	1%-5%	4.3	0.02	5.11	0.04	139	139
115	Acid	400-600	1%-5%	5.67	0.22516	6.32	0.15588	139	139
115	Acid	400-600	1%-5%	6.02	0.06928	6.24	0.13856	139	139
115	Acid	400-600	1%-5%	6.32	0.12124	6.5	0	139	139
115	Acid	400-600	1%-5%	5.75	0.0866	6.06	0.0866	139	139
115	Acid	400-600	1%-5%	5.89	0.13856	6.11	0.13856	139	139
115	Acid	400-600	1%-5%	5.67	0.22516	6.24	0.22516	139	139
115	Acid	400-600	1%-5%	6.02	0.06928	6.5	0.06928	139	139
115	Acid	400-600	1%-5%	6.32	0.12124	6.5	0.06928	139	139
115	Acid	400-600	1%-5%	5.75	0.0866	6.06	0.0866	139	139
115	Acid	400-600	1%-5%	5.89	0.13856	6.32	0.31176	139	139
125	Acid	400-600	1%-5%	5.2	0	5.5	0	139	139
125	Acid	400-600	1%-5%	5.2	0	5.9	0	139	139
128	Acid	400-600	1%-5%	5.71	0.05196	6.17	0.0866	139	139
128	Acid	400-600	1%-5%	5.71	0.05196	6.33	0.03464	139	139
140	Acid	400-600	1%-5%	5.7	0.01	6	0.05	139	139
140	Acid	400-600	1%-5%	5.7	0.01	6.15	0.05	139	139
208	Acid	400-600	1%-5%	4.31	0.01732	4.39	0.03464	139	139
208	Acid	400-600	1%-5%	4.31	0.01732	4.54	0.01732	139	139
208	Acid	400-600	1%-5%	4.31	0.01732	4.67	0.10392	139	139
208	Acid	400-600	1%-5%	4.29	0.03464	4.73	0.10392	139	139
208	Acid	400-600	1%-5%	4.29	0.03464	4.4	0.1732	139	139
208	Acid	400-600	1%-5%	4.29	0.03464	4.51	0.05196	139	139
209	Acid	400-600	1%-5%	3.47	0.347	4.75	0.475	139	139
209	Acid	400-600	1%-5%	3.47	0.347	4	0.4	139	139
209	Acid	400-600	1%-5%	3.47	0.347	4.41	0.441	139	139
209	Acid	400-600	1%-5%	3.47	0.347	3.71	0.371	139	139
209	Acid	400-600	1%-5%	3.69	0.369	4.71	0.471	139	139
211	Acid	400-600	1%-5%	4.74	0.11	5.88	0.15	139	139
211	Acid	400-600	1%-5%	4.74	0.11	6.56	0.25	139	139
211	Acid	400-600	1%-5%	4.74	0.11	4.82	0.19	139	139
211	Acid	400-600	1%-5%	4.74	0.11	4.97	0.05	139	139
226	Acid	400-600	1%-5%	5.63	0.563	5.93	0.593	139	139
226	Acid	400-600	1%-5%	5.38	0.538	5.79	0.579	139	139
229	Acid	400-600	1%-5%	5.95	0.1	6.88	0.1	139	139
233	Acid	400-600	1%-5%	5.83	0.583	6.36	0.636	139	139
233	Acid	400-600	1%-5%	5.83	0.583	6.65	0.665	139	139
235	Acid	400-600	1%-5%	4.5	0.16	4.92	0.16	139	139
263	Acid	400-600	1%-5%	4.8	0.13856	5.21	0.29444	139	139
263	Acid	400-600	1%-5%	4.8	0.13856	5.23	0.10392	139	139
263	Acid	400-600	1%-5%	4.81	0.06928	4.87	0.15588	139	139
263	Acid	400-600	1%-5%	4.81	0.06928	5.13	0.24248	139	139
265	Acid	400-600	1%-5%	4.79	0.09	5.21	0.05	139	139
265	Acid	400-600	1%-5%	4.79	0.09	5.32	0.04	139	139
265	Acid	400-600	1%-5%	4.65	0.08	5.04	0.06	139	139
265	Acid	400-600	1%-5%	4.65	0.08	5.04	0.08	139	139
265	Acid	400-600	1%-5%	4.63	0.05	4.81	0.07	139	139
265	Acid	400-600	1%-5%	4.63	0.05	5.02	0.04	139	139
265	Acid	400-600	1%-5%	4.57	0.07	4.8	0.07	139	139
265	Acid	400-600	1%-5%	4.57	0.07	4.75	0.05	139	139
265	Acid	400-600	1%-5%	4.34	0.04	4.65	0.04	139	139
265	Acid	400-600	1%-5%	4.34	0.04	4.66	0.05	139	139
326	Acid	400-600	1%-5%	5.93	0.6062	6.46	0.03464	139	139
332	Acid	400-600	1%-5%	4.88	0.05	5.12	0.01	139	139
332	Acid	400-600	1%-5%	6.01	0.06	6.29	0.15	139	139
332	Acid	400-600	1%-5%	5.54	0.23	6.26	0.17	139	139
333	Acid	400-600	1%-5%	6.09	0.06	6.65	0.05	139	139
366	Acid	400-600	1%-5%	5.9	0.28	7.58	0.39	139	139
438	Acid	400-600	1%-5%	4.94	0.19052	5.36	0.03464	139	139
438	Acid	400-600	1%-5%	4.94	0.19052	5.52	0.15588	139	139
438	Acid	400-600	1%-5%	4.96	0.10392	5.26	0.10392	139	139
438	Acid	400-600	1%-5%	4.96	0.10392	5.29	0.10392	139	139
448	Acid	400-600	1%-5%	5.41	0.05196	5.7	0.10392	139	139
448	Acid	400-600	1%-5%	5.41	0.05196	6.32	0.03464	139	139
468	Acid	400-600	1%-5%	5.49	0.02	5.84	0.18	139	139
468	Acid	400-600	1%-5%	5.67	0.06	5.9	0.18	139	139
468	Acid	400-600	1%-5%	6.3	0.1	6.55	0.12	139	139
473	Acid	400-600	1%-5%	7.05	0.05	7.15	0.03	139	139
473	Acid	400-600	1%-5%	7.06	0.02	7.13	0.03	139	139
473	Acid	400-600	1%-5%	5.77	0.01	5.86	0.01	139	139
473	Acid	400-600	1%-5%	5.68	0.02	5.85	0.01	139	139
482	Acid	400-600	1%-5%	6.03	0.06928	7.02	0.13856	139	139
482	Acid	400-600	1%-5%	6.01	0.0866	6.73	0.22516	139	139
509	Acid	400-600	1%-5%	5.99	0.10392	6.07	0.05196	139	139
509	Acid	400-600	1%-5%	5.99	0.10392	6.22	0.06928	139	139
509	Acid	400-600	1%-5%	5.69	0.13856	5.94	0.06928	139	139
509	Acid	400-600	1%-5%	5.69	0.13856	6.3	0.06928	139	139
523	Acid	400-600	1%-5%	6.88	0.14	7.58	0.02	139	139
559	Acid	400-600	1%-5%	4.55	0	4.92	0.29444	139	139
559	Acid	400-600	1%-5%	4.55	0	4.7	0.06928	139	139
565	Acid	400-600	1%-5%	5.68	0.03464	5.79	0.06928	139	139
565	Acid	400-600	1%-5%	5.68	0.03464	5.79	0.06928	139	139
565	Acid	400-600	1%-5%	5.71	0.03464	5.79	0.03464	139	139
565	Acid	400-600	1%-5%	5.71	0.03464	5.83	0.01732	139	139
577	Acid	400-600	1%-5%	6.07	0	6.43	0	139	139
577	Acid	400-600	1%-5%	6.27	0.05196	6.39	0.06928	139	139
577	Acid	400-600	1%-5%	6.78	0.05196	6.33	0.05196	139	139
577	Acid	400-600	1%-5%	5.69	0.15588	5.98	0.10392	139	139
577	Acid	400-600	1%-5%	6.53	0.05196	6.82	0.10392	139	139
577	Acid	400-600	1%-5%	6.59	0.05196	6.69	0.05196	139	139
577	Acid	400-600	1%-5%	6.3	0.06928	6.75	0.05196	139	139
22	Acid	400-600	5%-10%	5	0.5	5	0.5	21	21
96	Acid	400-600	5%-10%	4.97	0.15	8	0.2	21	21
105	Acid	400-600	5%-10%	4.84	0.11	7.91	0.32	21	21
105	Acid	400-600	5%-10%	4.95	0.495	7.43	0.26	21	21
134	Acid	400-600	5%-10%	4.97	0.497	7.42	0.28	21	21
134	Acid	400-600	5%-10%	4.3	0.02	5.3	0.11	21	21
134	Acid	400-600	5%-10%	4.48	0.04	6.03	0.04	21	21
134	Acid	400-600	5%-10%	4.56	0.04	6.17	0.02	21	21
324	Acid	400-600	5%-10%	3.95	0.01732	4.6	0	21	21
396	Acid	400-600	5%-10%	3.95	0.01732	4.48	0.01732	21	21
396	Acid	400-600	5%-10%	3.95	0.01732	4.82	0.05196	21	21
509	Acid	400-600	5%-10%	3.95	0.01732	4.86	0.01732	21	21
509	Acid	400-600	5%-10%	5.36	0.05	5.59	0.02	21	21
577	Acid	400-600	5%-10%	5.21	0.14	6.78	0.16	21	21
577	Acid	400-600	5%-10%	5.21	0.14	6.41	0.15	21	21
577	Acid	400-600	5%-10%	5.99	0.10392	6.66	0.10392	21	21
577	Acid	400-600	5%-10%	5.69	0.13856	6.7	0.05196	21	21
577	Acid	400-600	5%-10%	6.07	0	6.49	0.15588	21	21
577	Acid	400-600	5%-10%	6.27	0.05196	6.78	0	21	21
577	Acid	400-600	5%-10%	6.78	0.05196	7.04	0.06928	21	21
577	Acid	400-600	5%-10%	5.98	0.15588	6.01	0.3464	21	21
324	Acid	400-600	10%-20%	5.36	0.05	5.63	0.05	3	3
324	Acid	400-600	10%-20%	5.36	0.05	5.69	0.06	3	3
324	Acid	400-600	10%-20%	5.36	0.05	5.74	0.03	3	3
68	Neutral	400-600	＜1%	6.53	0.11	6.75	0.08	10	10
68	Neutral	400-600	＜1%	6.53	0.11	6.77	0.18	10	10
68	Neutral	400-600	＜1%	6.53	0.04	6.73	0.21	10	10
68	Neutral	400-600	＜1%	6.53	0.04	6.77	0.05	10	10
445	Neutral	400-600	＜1%	6.38	0.638	6.56	0.656	10	10
494	Neutral	400-600	＜1%	6.84	0.06928	6.89	0.0866	10	10
494	Neutral	400-600	＜1%	6.84	0.06928	6.98	0.05196	10	10
494	Neutral	400-600	＜1%	6.96	0.06928	7	0.10392	10	10
494	Neutral	400-600	＜1%	6.96	0.06928	7.05	0.03464	10	10
508	Neutral	400-600	＜1%	6.38	0.638	6.56	0.656	10	10
68	Neutral	400-600	1%-5%	6.53	0.11	6.77	0.12	13	13
68	Neutral	400-600	1%-5%	6.53	0.04	6.89	0.11	13	13
111	Neutral	400-600	1%-5%	6.67	0.03	6.74	0.03	13	13
111	Neutral	400-600	1%-5%	6.64	0.01	6.71	0.05	13	13
111	Neutral	400-600	1%-5%	6.62	0.03	6.69	0.02	13	13
111	Neutral	400-600	1%-5%	6.71	0.04	6.76	0.02	13	13
111	Neutral	400-600	1%-5%	6.72	0.01	6.75	0.04	13	13
111	Neutral	400-600	1%-5%	6.72	0.02	6.75	0.01	13	13
301	Neutral	400-600	1%-5%	6.69	0.13856	7.08	0.06928	13	13
445	Neutral	400-600	1%-5%	6.38	0.638	7.12	0.712	13	13
494	Neutral	400-600	1%-5%	6.84	0.06928	6.97	0.01732	13	13
494	Neutral	400-600	1%-5%	6.96	0.06928	7.1	0.06928	13	13
508	Neutral	400-600	1%-5%	6.38	0.638	7.12	0.712	13	13
301	Neutral	400-600	5%-10%	6.69	0.13856	7.14	0.06928	3	3
445	Neutral	400-600	5%-10%	6.38	0.638	7.72	0.772	3	3
508	Neutral	400-600	5%-10%	6.38	0.638	7.72	0.772	3	3
301	Neutral	400-600	10%-20%	6.69	0.13856	7.17	0.10392	1	1
32	Alkaline	400-600	＜1%	7.87	0.11	7.91	0.07	29	29
32	Alkaline	400-600	＜1%	8.01	0.08	8.15	0.18	29	29
36	Alkaline	400-600	＜1%	7.72	0.03464	7.73	0.03464	29	29
48	Alkaline	400-600	＜1%	8.43	0.03	8.39	0.03	29	29
48	Alkaline	400-600	＜1%	8.43	0.03	8.43	0.01	29	29
48	Alkaline	400-600	＜1%	8.2	0.02	8.23	0.05	29	29
48	Alkaline	400-600	＜1%	8.2	0.02	8.16	0.03	29	29
128	Alkaline	400-600	＜1%	8	0.03464	8.07	0.03464	29	29
241	Alkaline	400-600	＜1%	8.63	0.06928	8.89	0.03464	29	29
342	Alkaline	400-600	＜1%	8.73	0.03464	8.78	0.15588	29	29
342	Alkaline	400-600	＜1%	8.75	0.36372	8.68	0.10392	29	29
342	Alkaline	400-600	＜1%	8.36	0.2598	8.52	0.3464	29	29
402	Alkaline	400-600	＜1%	8.16	0.01	8.16	0.06	29	29
402	Alkaline	400-600	＜1%	8.16	0.01	8.19	0.06	29	29
402	Alkaline	400-600	＜1%	8.16	0.01	8.15	0	29	29
402	Alkaline	400-600	＜1%	8.39	0.02	8.43	0.08	29	29
402	Alkaline	400-600	＜1%	8.39	0.02	8.44	0.03	29	29
402	Alkaline	400-600	＜1%	8.39	0.02	8.37	0.02	29	29
462	Alkaline	400-600	＜1%	8.21	0.02	8.32	0.02	29	29
462	Alkaline	400-600	＜1%	8.21	0.02	8.35	0.04	29	29
462	Alkaline	400-600	＜1%	8.22	0.03	8.18	8.2	29	29
462	Alkaline	400-600	＜1%	8.22	0.03	8.23	0.04	29	29
462	Alkaline	400-600	＜1%	8.04	0.03	8.1	0.07	29	29
462	Alkaline	400-600	＜1%	8.04	0.03	8.08	0.07	29	29
501	Alkaline	400-600	＜1%	8.19	0.12124	8.3	0.10392	29	29
501	Alkaline	400-600	＜1%	8.1	0.06928	8.08	0.0866	29	29
501	Alkaline	400-600	＜1%	8.02	0.24248	8.2	0.29444	29	29
501	Alkaline	400-600	＜1%	8.27	0.06928	8.24	0.06928	29	29
501	Alkaline	400-600	＜1%	8.37	0.06928	8.42	0.06928	29	29
32	Alkaline	400-600	1%-5%	7.87	0.11	7.79	0.18	62	62
32	Alkaline	400-600	1%-5%	8.01	0.08	7.99	0.08	62	62
36	Alkaline	400-600	1%-5%	7.72	0.03464	7.76	0.05196	62	62
36	Alkaline	400-600	1%-5%	7.72	0.03464	7.79	0.05196	62	62
36	Alkaline	400-600	1%-5%	7.72	0.03464	7.83	0.05196	62	62
61	Alkaline	400-600	1%-5%	8.06	0.05	8.15	0.05	62	62
61	Alkaline	400-600	1%-5%	8.06	0.05	8.17	0.07	62	62
128	Alkaline	400-600	1%-5%	8	0.03464	8.11	0.06928	62	62
128	Alkaline	400-600	1%-5%	8	0.03464	8.13	0.03464	62	62
162	Alkaline	400-600	1%-5%	8.44	0.844	8.65	0.865	62	62
162	Alkaline	400-600	1%-5%	8.44	0.844	8.68	0.868	62	62
162	Alkaline	400-600	1%-5%	8.41	0.841	8.54	0.854	62	62
162	Alkaline	400-600	1%-5%	8.41	0.841	8.56	0.856	62	62
162	Alkaline	400-600	1%-5%	8.31	0.831	8.4	0.84	62	62
162	Alkaline	400-600	1%-5%	8.31	0.831	8.43	0.843	62	62
162	Alkaline	400-600	1%-5%	8.46	0.846	8.69	0.869	62	62
162	Alkaline	400-600	1%-5%	8.46	0.846	8.71	0.871	62	62
162	Alkaline	400-600	1%-5%	8.42	0.842	8.55	0.855	62	62
162	Alkaline	400-600	1%-5%	8.42	0.842	8.56	0.856	62	62
162	Alkaline	400-600	1%-5%	8.33	0.833	8.42	0.842	62	62
162	Alkaline	400-600	1%-5%	8.33	0.833	8.44	0.844	62	62
175	Alkaline	400-600	1%-5%	8.25	0.06	8.18	0.03	62	62
240	Alkaline	400-600	1%-5%	7.08	0.2598	7.23	0.3464	62	62
240	Alkaline	400-600	1%-5%	7.08	0.2598	7.22	0.2598	62	62
240	Alkaline	400-600	1%-5%	7.08	0.2598	7.41	0.48496	62	62
240	Alkaline	400-600	1%-5%	7.66	0.2598	7.7	0.2598	62	62
240	Alkaline	400-600	1%-5%	7.66	0.2598	7.81	0.39836	62	62
240	Alkaline	400-600	1%-5%	7.66	0.2598	7.94	0.79672	62	62
303	Alkaline	400-600	1%-5%	8.03	0.803	8.36	0.836	62	62
303	Alkaline	400-600	1%-5%	8.3	0.83	8.24	0.824	62	62
303	Alkaline	400-600	1%-5%	8.23	0.823	8.39	0.839	62	62
303	Alkaline	400-600	1%-5%	8.3	0.83	8.24	0.824	62	62
400	Alkaline	400-600	1%-5%	8.46	0.01	8.47	0.04	62	62
400	Alkaline	400-600	1%-5%	8.42	0.01	8.41	0.03	62	62
400	Alkaline	400-600	1%-5%	8.39	0.02	8.37	0.02	62	62
400	Alkaline	400-600	1%-5%	8.37	0	8.38	0.04	62	62
441	Alkaline	400-600	1%-5%	8.4	0.01732	8.32	0.01732	62	62
441	Alkaline	400-600	1%-5%	8.38	0.01732	8.32	0.01732	62	62
442	Alkaline	400-600	1%-5%	8.25	0.06	8.23	0.04	62	62
462	Alkaline	400-600	1%-5%	8.21	0.02	8.35	0.02	62	62
462	Alkaline	400-600	1%-5%	8.21	0.02	8.37	0.04	62	62
462	Alkaline	400-600	1%-5%	8.22	0.03	8.21	8.25	62	62
462	Alkaline	400-600	1%-5%	8.22	0.03	8.19	8.21	62	62
462	Alkaline	400-600	1%-5%	8.04	0.03	8.05	0.01	62	62
462	Alkaline	400-600	1%-5%	8.04	0.03	8.05	0.07	62	62
463	Alkaline	400-600	1%-5%	7.66	0.20784	7.7	0.13856	62	62
463	Alkaline	400-600	1%-5%	7.66	0.20784	7.81	0.20784	62	62
463	Alkaline	400-600	1%-5%	7.66	0.20784	7.93	0.793	62	62
501	Alkaline	400-600	1%-5%	8.19	0.12124	8.26	0.01732	62	62
501	Alkaline	400-600	1%-5%	8.19	0.12124	8.33	0.06928	62	62
501	Alkaline	400-600	1%-5%	8.1	0.06928	8.1	0.10392	62	62
501	Alkaline	400-600	1%-5%	8.1	0.06928	8.15	0.03464	62	62
501	Alkaline	400-600	1%-5%	8.02	0.24248	8.21	0.2598	62	62
501	Alkaline	400-600	1%-5%	8.02	0.24248	8.27	0.12124	62	62
501	Alkaline	400-600	1%-5%	8.27	0.06928	8.31	0.29444	62	62
501	Alkaline	400-600	1%-5%	8.27	0.06928	8.35	0.20784	62	62
501	Alkaline	400-600	1%-5%	8.37	0.06928	8.49	0.0866	62	62
501	Alkaline	400-600	1%-5%	8.37	0.06928	8.49	0.12124	62	62
565	Alkaline	400-600	1%-5%	7.88	0.01732	8.19	0	62	62
565	Alkaline	400-600	1%-5%	7.88	0.01732	8.3	0	62	62
565	Alkaline	400-600	1%-5%	8.08	0.01732	8.23	0.01732	62	62
565	Alkaline	400-600	1%-5%	8.08	0.01732	8.42	0.01732	62	62
61	Alkaline	400-600	5%-10%	8.06	0.05	8.18	0.03	10	10
162	Alkaline	400-600	5%-10%	8.44	0.844	8.7	0.87	10	10
162	Alkaline	400-600	5%-10%	8.41	0.841	8.56	0.856	10	10
162	Alkaline	400-600	5%-10%	8.31	0.831	8.45	0.845	10	10
162	Alkaline	400-600	5%-10%	8.46	0.846	8.73	0.873	10	10
162	Alkaline	400-600	5%-10%	8.42	0.842	8.58	0.858	10	10
162	Alkaline	400-600	5%-10%	8.33	0.833	8.46	0.846	10	10
175	Alkaline	400-600	5%-10%	8.25	0.06	8.11	0.04	10	10
175	Alkaline	400-600	5%-10%	8.25	0.06	7.99	0.01	10	10
442	Alkaline	400-600	5%-10%	8.25	0.06	8.18	0.04	10	10
442	Alkaline	400-600	10%-20%	8.25	0.06	8.01	0.06	1	1
155	Acid	600-800	＜1%	5.01	0.501	5.23	0.523	20	20
155	Acid	600-800	＜1%	5.09	0.509	5.11	0.511	20	20
155	Acid	600-800	＜1%	5.04	0.504	5.16	0.516	20	20
231	Acid	600-800	＜1%	6.01	0.033	6.16	0.066	20	20
231	Acid	600-800	＜1%	6.01	0.033	6.19	0.063	20	20
231	Acid	600-800	＜1%	5.06	0.038	5.13	0.068	20	20
231	Acid	600-800	＜1%	5.06	0.038	5.16	0.097	20	20
276	Acid	600-800	＜1%	5.75	0.02	5.82	0.03	20	20
353	Acid	600-800	＜1%	5.11	0.06928	5.15	0	20	20
353	Acid	600-800	＜1%	5.06	0.506	5.15	0.515	20	20
413	Acid	600-800	＜1%	6.19	0.01	6.25	0.07	20	20
413	Acid	600-800	＜1%	6.19	0.02	6.48	0.02	20	20
413	Acid	600-800	＜1%	6.31	0.06	6.31	0.06	20	20
413	Acid	600-800	＜1%	6.19	0.11	6.36	0.03	20	20
413	Acid	600-800	＜1%	6.22	0.07	6.35	0.04	20	20
413	Acid	600-800	＜1%	6.32	0.04	6.53	0.05	20	20
413	Acid	600-800	＜1%	6.32	0.06	6.35	0.04	20	20
413	Acid	600-800	＜1%	6.24	0.08	6.28	0.11	20	20
413	Acid	600-800	＜1%	6.35	0.05	6.54	0.05	20	20
413	Acid	600-800	＜1%	6.27	0.05	6.35	0.06	20	20
87	Acid	600-800	1%-5%	4.61	0.11	4.89	0.04	32	32
87	Acid	600-800	1%-5%	5.07	0.15	5.44	0.07	32	32
87	Acid	600-800	1%-5%	5.07	0.15	5.11	0.03	32	32
96	Acid	600-800	1%-5%	4.3	0.02	4.74	0.06	32	32
219	Acid	600-800	1%-5%	6.42	0.05	6.68	0.12	32	32
276	Acid	600-800	1%-5%	5.75	0.02	5.89	0.02	32	32
353	Acid	600-800	1%-5%	5.11	0.06928	5.31	0	32	32
353	Acid	600-800	1%-5%	5.06	0.506	5.1	0.51	32	32
413	Acid	600-800	1%-5%	6.19	0.01	6.3	0.06	32	32
413	Acid	600-800	1%-5%	6.19	0.01	6.47	0.03	32	32
413	Acid	600-800	1%-5%	6.19	0.02	6.69	0.09	32	32
413	Acid	600-800	1%-5%	6.19	0.02	6.98	0.01	32	32
413	Acid	600-800	1%-5%	6.31	0.06	6.32	0.06	32	32
413	Acid	600-800	1%-5%	6.31	0.06	6.38	0.02	32	32
413	Acid	600-800	1%-5%	6.19	0.11	6.48	0.06	32	32
413	Acid	600-800	1%-5%	6.19	0.11	6.8	0.04	32	32
413	Acid	600-800	1%-5%	6.22	0.07	6.41	0.04	32	32
413	Acid	600-800	1%-5%	6.22	0.07	6.51	0.05	32	32
413	Acid	600-800	1%-5%	6.32	0.04	6.75	0.06	32	32
413	Acid	600-800	1%-5%	6.32	0.04	7.02	0.04	32	32
413	Acid	600-800	1%-5%	6.32	0.06	6.41	0.08	32	32
413	Acid	600-800	1%-5%	6.32	0.06	6.45	0.07	32	32
413	Acid	600-800	1%-5%	6.39	0.07	6.52	0.04	32	32
413	Acid	600-800	1%-5%	6.39	0.07	6.82	0.08	32	32
413	Acid	600-800	1%-5%	6.24	0.08	6.38	0.08	32	32
413	Acid	600-800	1%-5%	6.24	0.08	6.51	0.08	32	32
413	Acid	600-800	1%-5%	6.35	0.05	6.75	0.04	32	32
413	Acid	600-800	1%-5%	6.35	0.05	7.01	0.01	32	32
413	Acid	600-800	1%-5%	6.31	0.08	6.33	0.05	32	32
413	Acid	600-800	1%-5%	6.31	0.08	6.38	0.01	32	32
413	Acid	600-800	1%-5%	6.27	0.05	6.44	0.06	32	32
413	Acid	600-800	1%-5%	6.27	0.05	6.81	0.07	32	32
96	Acid	600-800	5%-10%	4.3	0.02	5.2	0.01	18	18
134	Acid	600-800	5%-10%	3.95	0.01732	5.17	0.03464	18	18
134	Acid	600-800	5%-10%	3.95	0.01732	4.8	0.01732	18	18
134	Acid	600-800	5%-10%	3.95	0.01732	5.2	0.01732	18	18
134	Acid	600-800	5%-10%	3.95	0.01732	5.22	0.01732	18	18
396	Acid	600-800	5%-10%	5.21	0.14	6.82	0.18	18	18
413	Acid	600-800	5%-10%	6.19	0.01	6.8	0.05	18	18
413	Acid	600-800	5%-10%	6.19	0.02	7.8	0.04	18	18
413	Acid	600-800	5%-10%	6.31	0.06	6.55	0.06	18	18
413	Acid	600-800	5%-10%	6.19	0.11	7.51	0.08	18	18
413	Acid	600-800	5%-10%	6.22	0.07	6.84	0.12	18	18
413	Acid	600-800	5%-10%	6.32	0.04	7.83	0.02	18	18
413	Acid	600-800	5%-10%	6.32	0.06	6.59	0.01	18	18
413	Acid	600-800	5%-10%	6.39	0.07	7.54	0.09	18	18
413	Acid	600-800	5%-10%	6.24	0.08	6.87	0.15	18	18
413	Acid	600-800	5%-10%	6.35	0.05	7.89	0.04	18	18
413	Acid	600-800	5%-10%	6.31	0.08	6.58	0.03	18	18
413	Acid	600-800	5%-10%	6.27	0.05	7.59	0.09	18	18
232	Neutral	600-800	＜1%	7.17	0.717	7.35	0.735	3	3
232	Neutral	600-800	＜1%	7.17	0.717	7.34	0.734	3	3
232	Neutral	600-800	＜1%	7.17	0.717	7.63	0.763	3	3
232	Neutral	600-800	1%-5%	7.17	0.717	7.4	0.74	6	6
232	Neutral	600-800	1%-5%	7.17	0.717	7.43	0.743	6	6
232	Neutral	600-800	1%-5%	7.17	0.717	7.55	0.755	6	6
232	Neutral	600-800	1%-5%	7.17	0.717	7.65	0.765	6	6
232	Neutral	600-800	1%-5%	7.17	0.717	7.7	0.77	6	6
232	Neutral	600-800	1%-5%	7.17	0.717	7.79	0.779	6	6
370	Neutral	600-800	5%-10%	7.31	0.35	7.61	0.32	2	2
370	Neutral	600-800	5%-10%	7.24	0.1	7.46	0.03	2	2
370	Neutral	600-800	10%-20%	7.31	0.35	7.81	0.15	6	6
370	Neutral	600-800	10%-20%	7.31	0.35	8.06	0.1	6	6
370	Neutral	600-800	10%-20%	7.31	0.35	8.18	0.15	6	6
370	Neutral	600-800	10%-20%	7.24	0.1	7.51	0.23	6	6
370	Neutral	600-800	10%-20%	7.24	0.1	7.49	0.05	6	6
370	Neutral	600-800	10%-20%	7.24	0.1	8.03	0.1	6	6
394	Alkaline	600-800	＜1%	7.99	0.05196	7.62	0.10392	6	6
394	Alkaline	600-800	＜1%	8.02	0.06928	7.95	0.06928	6	6
419	Alkaline	600-800	＜1%	8.2	0.82	8	0.8	6	6
419	Alkaline	600-800	＜1%	8	0.8	7.8	0.78	6	6
456	Alkaline	600-800	＜1%	8.85	0.885	8.76	0.876	6	6
456	Alkaline	600-800	＜1%	8.85	0.885	8.81	0.881	6	6
456	Alkaline	600-800	1%-5%	8.85	0.885	8.91	0.891	1	1
