# Supplementary material for: Response of soil pH to biochar application in farmland across China: a meta-analysis
Source: PeerJ. 2025 Apr 28;13:e19400. doi: 10.7717/peerj.19400 (PMC12045268; doi:10.7717/peerj.19400)
Supplement: Supplemental Information 2 — The provinces where the sampling points are located and the latitude and longitude [file peerj-13-19400-s002.xlsx]

## Sheet: Sheet1
Province	East Longitude	North Latitude
Yunnan	102.84	24.89
Jiangxi	116.34	28.2583
Liaoning	123.8	42.2333
Chongqing	107.082	29.915
Hunan	113.331	28.5511
Zhejiang	121.117	28.0333
Jiangxi	116.874	26.3718
Hubei	114.091	25.1764
Guangdong	113.72	22.55
Hebei	115.705	38.8292
Hunan	113.117	28.1667
Anhui	120.333	32
Jiangsu	119.693	31.4072
Zhejiang	121.35	28.35
Fujian	118.3	25.9
Guangdong	114.567	23.1
Hubei	114.321	30.2967
Jiangsu	119.133	31.1
Jiangsu	120.8	31.2
Jiangsu	118.85	31.9833
Hubei	114.321	30.2967
Zhejiang	119.53	30.21
Shandong	117.967	36.95
Jiangxi	115.6	28.7667
Hunan	113.05	28.4333
Liaoning	123.55	40.8
Hebei	120.45	38.6667
Jiangsu	118.833	31.95
Zhejiang	120.568	30.5833
Jiangsu	121.089	35.0558
Zhejiang	119.7	30.2333
Hubei	114.417	30.8191
Hunan	113.331	28.5511
Zhejiang	119.08	29.0923
Zhejiang	121.117	28.0333
Jiangsu	119.693	31.4072
Hunan	113.333	28.5833
Jiangxi	116.433	28.6167
Shandong	118.05	37.4833
Fujian	118.767	26.8167
Liaoning	123.55	41.8167
Jiangsu	118.833	31.8667
Anhui	119.7	32.5833
Sichuan	104.167	31.05
Zhejiang	121	30
Zhejiang	120.036	29.1403
Jiangxi	116.433	28.6167
Guangdong	114.28	23.18
Jilin	123.583	44.8333
Zhejiang	119.133	29.15
Shaanxi	107.88	35.28
Jiangsu	119.133	31.1
Hunan	113.331	28.5511
Jiangsu	119.767	31.2333
Zhejiang	120.24	29.76
Liaoning	123.4	41.0833
Jiangxi	116.092	28.0917
Henan	113.935	35.065
Zhejiang	119.87	30.39
Zhejiang	119.869	30.3925
Zhejiang	119.868	30.3902
Sichuan	105.28	31.16
Guangxi	111.25	23.41
Jiangxi	116.083	28.0833
Liaoning	123.34	41.49
Henan	114.4	35
Hunan	113.9	24.8333
Hubei	114.35	30.4667
Hunan	113.067	28.1833
Jiangsu	119.986	31.4765
Fujian	119.077	26.2039
Jiangsu	119.133	31.1
Guangxi	107.75	23.2167
Guangxi	108.85	23.5333
Anhui	118.467	31.8333
Heilongjiang	126.717	45.7333
Guangdong	113.5	23.1667
Hainan	110.217	20.3167
Henan	113.657	34.7839
Hubei	114.517	30.4667
Inner Mongolia	111.767	40.2667
Sichuan	104.167	31.05
Sichuan	104.167	31.05
Shandong	117.15	36.1667
Hunan	113.331	28.5511
Shanxi	112.58	37.4225
Jiangsu	119.683	31.4
Jiangxi	116.333	28.25
Jiangxi	113.2	28.1333
Sichuan	104.167	31.05
Shaanxi	109.323	36.8583
Sichuan	105.547	26.46
Chongqing	106.45	29.53
Hebei	116.181	40.1394
Henan	113.657	34.7839
Zhejiang	120.406	30.4353
Jiangsu	119.133	31.1
Hainan	109.976	19.7506
Guangxi	108.269	23.1844
Jiangxi	116.922	28.2044
Jiangxi	116.896	28.2344
Jiangxi	116.918	28.21
Jiangxi	115.315	26.3231
Jiangxi	116.34	28.2583
